# Supplementary material
Source: HighWire-hosted journal article supplement (https://www.annals.org/content/suppl/2008/02/12/0000605-200803180-00211)
Supplement: Kane_AT02_148-6-458-DC1-2.pdf [file Kane_AT02_148-6-458-DC1-2.pdf]

Appendix Table 2. The Effects of Behavioral Interventions on Female Urinary Incontinence: Results from Randomized Controlled Clinical Trials\*

| Author Sample Followup                                                   | Active Treatment                                                                                             | Control Treatment                                                                                    | Outcome                                        | (Events/Active Treatment) [Events/Control Treatment ] | Relative Risk (95% CI)                | Risk Difference (95%CI) | Quality Issues                                                                                                                                                                                                                         |
|--------------------------------------------------------------------------|--------------------------------------------------------------------------------------------------------------|------------------------------------------------------------------------------------------------------|------------------------------------------------|-------------------------------------------------------|---------------------------------------|-------------------------|----------------------------------------------------------------------------------------------------------------------------------------------------------------------------------------------------------------------------------------|
| <b>Continence</b>                                                        |                                                                                                              |                                                                                                      |                                                |                                                       |                                       |                         |                                                                                                                                                                                                                                        |
| Aksac, 2003; (98)<br>N = 50, stress UI<br>2 month followup               | Pelvic floor muscle training via biofeedback (vaginal probe in electromyography pressure mode)               | Usual care                                                                                           | Negative pad test                              | (16/20) [0/10]                                        | <b>17.29</b><br><b>(1.14; 261.69)</b> |                         | Intention to treat not stated. Randomization with choosing closed letters (patients had to pick up closed letters). Allocation concealment not adequate. Baseline data confirmed adequacy of randomization. Sample size not justified. |
|                                                                          | Pelvic floor muscle training and biofeedback via digital palpation at home                                   | Usual care                                                                                           | Negative pad test                              | (15/20) [0/10]                                        | <b>16.24</b><br><b>(1.07; 246.51)</b> |                         |                                                                                                                                                                                                                                        |
| Bo, 2005(105)<br>N = 47, urodynamic stress UI<br>180 month followup      | Pelvic floor muscle training under the supervision of physical therapist                                     | Home exercise groups                                                                                 | Self reported continence                       | (13/21) [4/26]                                        | <b>4.02</b><br><b>(1.54; 10.53)</b>   | 0.47<br>(0.22; 0.71)    | Intention to treat. Open label. Randomization and allocation concealment not reported. Baseline data confirmed adequacy of randomization. Sample size justified.                                                                       |
| Borello-France, 2006(146)<br>N = 44, stress UI<br>3 month followup       | pelvic-floor muscle exercises with electromyography biofeedback in the supine position                       | pelvic-floor muscle exercises with electromyography biofeedback in both supine and upright positions | Self reported continence+ negative stress test | (13/22) [13/22]                                       | 1.00<br>(0.61; 1.64)                  | 0.00<br>(-0.29; 0.29)   | Intention-to-treat. Open label. Block randomization schedule with a random-number table. Allocation concealment not reported. Baseline data confirmed adequacy of randomization. Sample size not justified.                            |
| Mørkved, 2002, (85)<br>N = 103, urodynamic stress UI<br>6 month followup | Pelvic floor muscle training, individually supervised by a physical therapist and at home with a biofeedback | Pelvic floor muscle training, individually supervised by a physical therapist and at                 | Negative pad test                              | (28/53) [21/50]                                       | 1.26<br>(0.83; 1.90)                  | 0.11<br>(-0.08; 0.30)   | Intention to treat. Single blind. Centralized but no computerized randomization stratified by results of a pad test with standardized bladder volume (20g or less and more than 20g of leakage). Allocation concealment not adequate.  |

|                                                                     |                                                                                                                                                                                          |                                                                                                        |                          |                    |                                                 |                          |                                                                                                                                                                                                                                                                  |
|---------------------------------------------------------------------|------------------------------------------------------------------------------------------------------------------------------------------------------------------------------------------|--------------------------------------------------------------------------------------------------------|--------------------------|--------------------|-------------------------------------------------|--------------------------|------------------------------------------------------------------------------------------------------------------------------------------------------------------------------------------------------------------------------------------------------------------|
|                                                                     | apparatus                                                                                                                                                                                | home without biofeedback                                                                               |                          |                    |                                                 |                          | Baseline data confirmed adequacy of randomization. Sample size justified.                                                                                                                                                                                        |
| Moore, 2003(104)<br>N = 145, stress and/or urge<br>3 month followup | Nurse continence advisors and consulting urogynecologist provided bladder training, gradual increase in fluid intake, pelvic floor muscle training, and transvaginal electro stimulation | Outpatient regimen with 15-20 minute consultation and referral to physiotherapist and bladder training | Negative pad test        | (37/74)<br>[27/71] | 1.31<br>(0.90;<br>1.91)                         | 0.12<br>(-0.04;<br>0.28) | Intention to treat. Open label. Computer-generated randomization stratified with respect to mild and moderate leakage with permuted blocks of 20. Allocation concealment not adequate. Baseline data confirmed adequacy of randomization. Sample size justified. |
| Bo, 1999(80)<br>N = 122, urodynamic stress UI<br>6 month followup   | Pelvic floor muscle training at home and in groups with skilled physical therapists                                                                                                      | Use of a continence guard                                                                              | Self reported continence | (14/29)<br>[1/32]  | <b>15.45</b><br><b>(2.16;</b><br><b>110.28)</b> | 0.45<br>(0.26;<br>0.64)  | Intention to treat. Single blind. Computer generated random numbers stratified by baseline leakage. Allocation concealment unclear. Baseline data confirmed adequacy of randomization. Sample size justified.                                                    |
| Goode, 2003(107)<br>N = 200, stress UI<br>2 month followup          | Behavioral training (biofeedback-assisted pelvic floor muscle training, bladder control strategies, and self-monitoring with bladder diaries) and pelvic floor electrical stimulation    | Self-administered behavioral training administered with a self-help booklet                            | Negative stress test     | (32/67)<br>[25/67] | 1.28<br>(0.86;<br>1.91)                         | 0.10<br>(-0.06;<br>0.27) | Intention to treat. Open label. Computer-generated stratified by types and severity of incontinence and race randomization with block size of 6. Allocation concealment unclear. Baseline data confirmed adequacy of randomization. Sample size justified.       |
| Wang, 2004(143)<br>N = 120, overactive bladder<br>3 month           | Electrical stimulation in the management of overactive bladder                                                                                                                           | Pelvic floor muscle training                                                                           | Self reported continence | (17/42)<br>[12/40] | 1.35<br>(0.74;<br>2.46)                         | 0.10<br>(-0.10;<br>0.31) | No intention to treat. Single blind. Central computer-generated randomization in blocks of 6. Allocation concealment adequate. Baseline data did not confirm adequacy of randomization. Sample                                                                   |

|                                                                         |                                                                                                                                                   |                                               |                          |                      |                                     |                       |                                                                                                                                                                                                                                                                  |
|-------------------------------------------------------------------------|---------------------------------------------------------------------------------------------------------------------------------------------------|-----------------------------------------------|--------------------------|----------------------|-------------------------------------|-----------------------|------------------------------------------------------------------------------------------------------------------------------------------------------------------------------------------------------------------------------------------------------------------|
| followup                                                                |                                                                                                                                                   |                                               |                          |                      |                                     |                       | size justified.                                                                                                                                                                                                                                                  |
| Cammu, 1998(147)<br>N = 30,<br>urodynamic stress UI<br>3 month followup | Weekly session of pelvic floor muscle training/vaginal probe-electromyography biofeedback                                                         | Vaginal weight cones (20, 32, 45, 57 and 70g) | Negative stress test     | (12/30)<br>[12/30]   | 1.00<br>(0.54; 1.86)                | 0.00<br>(-0.25; 0.25) | Intention to treat. Open label. Computerized randomization with random numbers tables. Allocation concealment not adequate. Baseline data confirmed adequacy of randomization. Sample size not justified                                                         |
| Wang, 2004(143)<br>N = 120,<br>overactive bladder<br>3 month followup   | Biofeedback-assisted pelvic floor muscle training with a vaginal probe-electromyography biofeedback                                               | Pelvic floor muscle training                  | Self reported continence | (15/38)<br>[12/40]   | 1.32<br>(0.71; 2.44)                | 0.09<br>(-0.12; 0.31) | No intention to treat. Single blind. Central computer-generated randomization in blocks of 6. Allocation concealment adequate. Baseline data did not confirm adequacy of randomization. Sample size justified.                                                   |
| Bo, 1999(80)<br>N = 122,<br>urodynamic stress UI<br>6 month followup    | pelvic floor muscle training at home and in groups with skilled physical therapists 1/week                                                        | Use of a continence guard                     | Negative pad test        | (11/29)<br>[2/32]    | <b>6.07</b><br><b>(1.47; 25.12)</b> | 0.32<br>(0.12; 0.51)  | Intention to treat. Single blind. Computer generated random numbers stratified by baseline leakage. Allocation concealment unclear. Baseline data confirmed adequacy of randomization. Baseline data confirmed adequacy of randomization. Sample size justified. |
| Kim, 2001(102)<br>N = 33, stress or mixed UI<br>3 month followup        | Continence Efficacy Intervention Program: common pelvic floor muscle education, audiovisual tape, schedule guideline, assessing self-care methods | Conventional care                             | Self reported continence | (6/16)<br>[2/17]     | 3.19<br>(0.75; 13.55)               | 0.26<br>(-0.03; 0.54) | No Intention to treat. Open label. Randomization by the order of coming to the clinic. Allocation concealment not reported. Baseline data confirmed adequacy of randomization. Sample size not justified.                                                        |
| Diokno, 2004(96)<br>N = 359,<br>continent women (0-5                    | Behavioral modification program: pelvic floor muscle training, bladder                                                                            | Usual care                                    | Self reported continence | (61/164)<br>[55/195] | 1.32<br>(0.98; 1.78)                | 0.09<br>(-0.01; 0.19) | Intention to treat not stated. Single blind (nurse examiner). Randomizations in blocks of 16 women to provide balanced recruitment between groups.                                                                                                               |

|                                                                                    |                                                                                                                        |                                                                                                               |                          |                    |                      |                        |                                                                                                                                                                                                                                                                                                                  |
|------------------------------------------------------------------------------------|------------------------------------------------------------------------------------------------------------------------|---------------------------------------------------------------------------------------------------------------|--------------------------|--------------------|----------------------|------------------------|------------------------------------------------------------------------------------------------------------------------------------------------------------------------------------------------------------------------------------------------------------------------------------------------------------------|
| days of incontinent episodes in the previous year)<br>12 month followup            | training                                                                                                               |                                                                                                               |                          |                    |                      |                        | Allocation concealment adequate. Results adjusted to baseline differences. Sample size not justified.                                                                                                                                                                                                            |
| Elser, 1999(144)<br>N = 204, stress UI or detrusor instability<br>3 month followup | Pelvic floor muscle training with visual and verbal biofeedback                                                        | Bladder training                                                                                              | Self reported continence | (25/68)<br>[17/68] | 1.47<br>(0.88; 2.46) | 0.12<br>(-0.04; 0.27)  | No intention to treat Open label. Stratified by severity of urinary incontinence, urodynamic diagnosis, and treatment site randomization. Allocation concealment not reported. Baseline data did not confirm adequacy of randomization. Sample size justified.                                                   |
| Mørkved, 2002, (85)<br>N = 103, urodynamic stress UI<br>6 month followup           | Pelvic floor muscle training, individually supervised by a physical therapist and at home with a biofeedback apparatus | Pelvic floor muscle training, individually supervised by a physical therapist and at home without biofeedback | Self Reported Continence | (19/53)<br>[14/50] | 1.28<br>(0.72; 2.27) | 0.08<br>(-0.10; 0.26)  | Intention to treat. Single blind. Centralized but no computerized randomization stratified by results of a pad test with standardized bladder volume (20 g or less and more than 20g of leakage). Allocation concealment not adequate. Baseline data confirmed adequacy of randomization. Sample size justified. |
| McFall, 2000(103)<br>N = 145, any UI<br>3 month followup                           | Community-based intervention: bladder training, managing the urge to urinate, and performing pelvic muscle exercises   | Usual care                                                                                                    | Self reported continence | (25/72)<br>[15/73] | 1.69<br>(0.97; 2.93) | 0.14<br>(0.0; 0.29)    | No intention to treat. Open label. Randomization and allocation concealment not reported. Baseline data confirmed adequacy of randomization. No justification for sample size.                                                                                                                                   |
| Alewijnse, 2003 (148)<br>N = 129, any UI<br>14 month followup                      | Pelvic floor muscle training with reminder and self-help guide                                                         | Bladder training and pelvic floor muscle training                                                             | Self reported continence | (17/52)<br>[21/51] | 0.79<br>(0.48; 1.32) | -0.08<br>(-0.27; 0.10) | Intention to treat. Open label. Allocation concealment unclear. Baseline data confirmed adequacy of randomization. Sample size justified.                                                                                                                                                                        |
| Bo, 2005(105)<br>N = 47,                                                           | Intensive pelvic floor muscle                                                                                          | Home exercise groups                                                                                          | Self reported continence | (6/21)<br>[4/26]   | 1.86<br>(0.60;       | 0.13<br>(-0.11;        | Intention to treat. Open label. Randomization and allocation                                                                                                                                                                                                                                                     |

|                                                                 |                                                                                                                                                               |                                                                                            |                          |                 |                   |                     |                                                                                                                                                                                                                                                            |
|-----------------------------------------------------------------|---------------------------------------------------------------------------------------------------------------------------------------------------------------|--------------------------------------------------------------------------------------------|--------------------------|-----------------|-------------------|---------------------|------------------------------------------------------------------------------------------------------------------------------------------------------------------------------------------------------------------------------------------------------------|
| urodynamic stress UI 180 month followup                         | training with 8-12 maximum contractions for 6-8 seconds 3 series/ day under the supervision of physical therapist for 6 months                                |                                                                                            |                          |                 | 5.73)             | 0.37)               | concealment not reported. Baseline data confirmed adequacy of randomization. Sample size justified.                                                                                                                                                        |
| Goode, 2003(107) N = 200, stress UI 2 month followup            | Behavioral training (biofeedback-assisted pelvic floor muscle training, home exercises, bladder control strategies, and self-monitoring with bladder diaries) | Self-administered behavioral training administered with a self-help booklet                | Negative stress test     | (18/66) [25/67] | 0.73 (0.44; 1.21) | -0.10 (-0.26; 0.06) | Intention to treat. Open label. Computer-generated stratified by types and severity of incontinence and race randomization with block size of 6. Allocation concealment unclear. Baseline data confirmed adequacy of randomization. Sample size justified. |
| Wells, 1991(135) N = 157, stress UI 6 month followup            | Pelvic muscle exercises                                                                                                                                       | Phenylpropanolamine hydrochloride in a dose of 50 mg/ day, increasing to 50 mg 2 times/day | Self reported continence | (22/82) [11/75] | 1.85 (0.96; 3.56) | 0.12 (0.00; 0.25)   | No Intention to treat. Open label. Randomization and allocation concealment not reported. Baseline data confirmed adequacy of randomization. Sample size not justified                                                                                     |
| Wyman, 1998(149) N = 204, urodynamic stress UI 6 month followup | Combination of bladder training and pelvic muscle exercise                                                                                                    | Bladder training                                                                           | Self reported continence | (16/67) [10/68] | 1.62 (0.79; 3.32) | 0.09 (-0.04; 0.22)  | No intention to treat. Open label. Allocation concealment unclear. Baseline data confirmed adequacy of randomization. Sample size justified.                                                                                                               |
| Arvonen, 2001(150) N = 37, stress UI 4 month followup           | Pelvic floor muscle training program                                                                                                                          | Pelvic floor muscle training program using weighted vaginal balls                          | Negative pad test        | (5/19) [9/18]   | 0.53 (0.22; 1.27) | -0.24 (-0.54; 0.07) | No intention to treat. Open label. Randomization and allocation concealment not reported. Baseline data confirmed adequacy of randomization. Sample size not justified.                                                                                    |

|                                                                                 |                                                                                                            | 50-100 g                                                                 |                          |                      |                                               |                          |                                                                                                                                                                                                                                                                                                                               |
|---------------------------------------------------------------------------------|------------------------------------------------------------------------------------------------------------|--------------------------------------------------------------------------|--------------------------|----------------------|-----------------------------------------------|--------------------------|-------------------------------------------------------------------------------------------------------------------------------------------------------------------------------------------------------------------------------------------------------------------------------------------------------------------------------|
| Berghmans, 1996, (151)<br>N = 40,<br>urodynamic stress UI<br>3 month followup   | Pelvic floor muscle training with electromyography biofeedback                                             | Pelvic floor muscle training                                             | Self reported continence | (5/20)<br>[3/20]     | 1.67<br>(0.46;<br>6.06)                       | 0.10<br>(-0.15;<br>0.35) | Intention to treat Single blind. Computer generated randomization stratified by seriousness of incontinence (grade 1 and 2) and by referral (general practitioner or urologist) with permuted blocks of 4. Allocation concealment not adequate. Baseline data confirmed adequacy of randomization. Sample size not justified. |
| Burns, 1993(100)<br>N = 135,<br>urodynamic stress UI<br>6 month followup        | Biofeedback using vaginal electromyography probe                                                           | Usual care                                                               | Self reported continence | (9/40)<br>[1/39]     | <b>8.78</b><br><b>(1.17;</b><br><b>66.04)</b> | 0.20<br>(0.06;<br>0.34)  | No Intention to treat. Single-blind. Randomization and allocation concealment not reported. Baseline data confirmed adequacy of randomization. Sample size not justified                                                                                                                                                      |
| Janssen, 2001(106)<br>N = 530, any UI<br>12 month followup                      | Individual pelvic floor muscle training and bladder training                                               | Group pelvic floor muscle training bladder training                      | Self reported continence | (28/126)<br>[57/404] | <b>1.58</b><br><b>(1.05;</b><br><b>2.36)</b>  | 0.08<br>(0.00;<br>0.16)  | Intention to treat. Single blind. Stratified by type, severity and duration of incontinence frequency sampling randomization. Allocation concealment not adequate. Baseline data confirmed adequacy of randomization. Sample size not justified.                                                                              |
| Lagro-Janssen, 1991(152)<br>N = 66,<br>urodynamic stress UI<br>3 month followup | Instructions in pelvic floor muscle training                                                               | No therapy                                                               | Self reported continence | (7/33)<br>[1/33]     | 7.00<br>(0.91;<br>53.78)                      | 0.18<br>(0.03;<br>0.33)  | Intention to treat not stated. Open label. Randomization and allocation concealment not reported. Baseline data confirmed adequacy of randomization. Sample size not justified.                                                                                                                                               |
| Janssen, 2001(106)<br>N = 530, any UI<br>12 month followup                      | Individual pelvic floor exercises 5 times/day and bladder training with delay voiding, training with 11 30 | Group pelvic floor exercises 5 times/day and bladder training with delay | Self reported continence | (25/126)<br>[53/404] | <b>1.5 (1.0;</b><br><b>2.3)</b>               | 0.07<br>(-0.01;<br>0.14) | Intention to treat. Single blind. Stratified by type, severity and duration of incontinence frequency sampling randomization. Allocation concealment not adequate. Baseline data confirmed adequacy of randomization. Sample size not                                                                                         |

|                                                                                    | minute sessions.                                                                                                    | voiding,<br>training with<br>9 2 hour<br>sessions                                                                                           |                             |                    |                                                |                          | justified.                                                                                                                                                                                                                     |
|------------------------------------------------------------------------------------|---------------------------------------------------------------------------------------------------------------------|---------------------------------------------------------------------------------------------------------------------------------------------|-----------------------------|--------------------|------------------------------------------------|--------------------------|--------------------------------------------------------------------------------------------------------------------------------------------------------------------------------------------------------------------------------|
| Wyman,<br>1998(149)<br>N = 204,<br>urodynamic<br>stress UI<br>6 month<br>followup  | Pelvic muscle<br>exercise with<br>biofeedback-<br>assisted<br>instruction                                           | Bladder<br>training                                                                                                                         | Self reported<br>continence | (13/69)<br>[10/68] | 1.28<br>(0.60;<br>2.72)                        | 0.04<br>(-0.08;<br>0.17) | No intention to treat. Open label.<br>Allocation concealment unclear.<br>Baseline data confirmed adequacy of<br>randomization. Sample size justified.                                                                          |
| Burgio,<br>2002(153)<br>N = 222,urge<br>or mixed UI<br>2 month<br>followup         | Biofeedback-<br>assisted<br>behavioral<br>training<br>implemented by<br>nurse<br>practitioners                      | Self-<br>administered<br>behavioral<br>treatment<br>using booklet<br>to advise<br>pelvic floor<br>muscle<br>training and<br>bladder control | Self reported<br>continence | (15/73)<br>[11/75] | 1.40<br>(0.69;<br>2.84)                        | 0.06<br>(-0.06;<br>0.18) | Intention-to-treat. Open label.<br>Randomization stratified by race,<br>type, and severity of incontinence.<br>Allocation concealment unclear.<br>Baseline data confirmed adequacy of<br>randomization. Sample size justified. |
|                                                                                    | Behavioral<br>training without<br>biofeedback<br>pelvic floor<br>muscle training                                    | Self-<br>administered<br>behavioral<br>treatment<br>using booklet<br>to advise<br>pelvic floor<br>muscle<br>training and<br>bladder control | Self reported<br>continence | (15/74)<br>[11/75] | 1.38<br>(0.68;<br>2.81)                        | 0.06<br>(-0.07;<br>0.18) |                                                                                                                                                                                                                                |
| Lagro-Janssen,<br>1992(99)<br>N = 106, stress<br>or urge UI<br>3 month<br>followup | Pelvic floor<br>muscle training<br>alone (stress) or<br>bladder training<br>(urge) or its<br>combination<br>(mixed) | Usual care                                                                                                                                  | Self reported<br>continence | (10/54)<br>[1/56]  | <b>10.37</b><br><b>(1.37;</b><br><b>78.28)</b> | 0.17<br>(0.06;<br>0.28)  | Intention to treat not stated. Open<br>label. Randomization and allocation<br>concealment not reported. Baseline<br>data confirmed adequacy of<br>randomization. Sample size not<br>justified.                                 |
| Goode,<br>2003(107)                                                                | Behavioral<br>training                                                                                              | Self-<br>administered                                                                                                                       | Self reported<br>continence | (11/66)<br>[10/67] | 1.12<br>(0.51;                                 | 0.02<br>(-0.11;          | Intention to treat. Open label.<br>Computer-generated stratified by                                                                                                                                                            |

|                                                                                       |                                                                                                                                                                                                   |                                                                             |                                                |                    |                          |                           |                                                                                                                                                                                                                                                                |
|---------------------------------------------------------------------------------------|---------------------------------------------------------------------------------------------------------------------------------------------------------------------------------------------------|-----------------------------------------------------------------------------|------------------------------------------------|--------------------|--------------------------|---------------------------|----------------------------------------------------------------------------------------------------------------------------------------------------------------------------------------------------------------------------------------------------------------|
| N = 200, stress UI<br>2 month<br>followup                                             | (biofeedback-assisted pelvic floor muscle training, home exercises, bladder control strategies, and self-monitoring with bladder diaries)                                                         | behavioral training administered with a self-help booklet                   |                                                |                    | 2.45)                    | 0.14)                     | types and severity of incontinence and race randomization with block size of 6. Allocation concealment unclear. Baseline data confirmed adequacy of randomization. Sample size justified.                                                                      |
| Burns, 1993(100)<br>N = 135, urodynamic stress UI<br>6 month<br>followup              | Pelvic muscle exercise with increased intensity                                                                                                                                                   | Usual care                                                                  | Self reported continence                       | (7/43)<br>[1/39]   | 6.35<br>(0.82;<br>49.32) | 0.14<br>(0.02;<br>0.26)   | No Intention to treat. Single-blind. Randomization and allocation concealment not reported. Baseline data confirmed adequacy of randomization. Sample size not justified                                                                                       |
| Goode, 2003(107)<br>N = 200, stress UI<br>2 month<br>followup                         | Behavioral training (biofeedback-assisted pelvic floor muscle training, home exercises, bladder control strategies, self-monitoring with bladder diaries) and pelvic floor electrical stimulation | Self-administered behavioral training administered with a self-help booklet | Self reported continence                       | (10/67)<br>[10/67] | 1.00<br>(0.45;<br>2.24)  | 0.00<br>(-0.12;<br>0.12)  | Intention to treat. Open label. Computer-generated stratified by types and severity of incontinence and race randomization with block size of 6. Allocation concealment unclear. Baseline data confirmed adequacy of randomization. Sample size justified.     |
| Elser, 1999(144)<br>N = 204, stress UI or detrusor instability<br>3 month<br>followup | Pelvic floor muscle training combined with bladder training                                                                                                                                       | Bladder training                                                            | Self reported continence+ negative stress test | (10/68)<br>[17/68] | 0.59<br>(0.29;<br>1.19)  | -0.10<br>(-0.24;<br>0.03) | No intention to treat Open label. Stratified by severity of urinary incontinence, urodynamic diagnosis, and treatment site randomization. Allocation concealment not reported. Baseline data did not confirm adequacy of randomization. Sample size justified. |
| Fantl, 1991(86)<br>N = 131,                                                           | Bladder training included participant                                                                                                                                                             | Usual care                                                                  | Self reported continence                       | (8/65)<br>[2/66]   | 4.06<br>(0.90;<br>18.41) | 0.09<br>(0.00;<br>0.18)   | No intention to treat. Open label Randomization stratified by urodynamic incontinence. Allocation                                                                                                                                                              |

|                                                                      |                                                                                              |                                                                                              |                                                         |                        |                                                            |                             |                                                                                                                                                                                                                                                                                                    |
|----------------------------------------------------------------------|----------------------------------------------------------------------------------------------|----------------------------------------------------------------------------------------------|---------------------------------------------------------|------------------------|------------------------------------------------------------|-----------------------------|----------------------------------------------------------------------------------------------------------------------------------------------------------------------------------------------------------------------------------------------------------------------------------------------------|
| urodynamic UI<br>1.5 month<br>followup                               | education,<br>voiding schedule,<br>and positive<br>reinforcement                             |                                                                                              |                                                         |                        |                                                            |                             | concealment unclear. Baseline data confirmed adequacy of randomization. Sample size justified.                                                                                                                                                                                                     |
| Arvonen,<br>2001(150)<br>N = 37, stress<br>UI<br>4 month<br>followup | Pelvic floor<br>muscle training<br>program                                                   | Pelvic floor<br>muscle<br>training<br>program using<br>weighted<br>vaginal balls<br>50-100 g | Self reported<br>continence                             | (0/19)<br>[4/18]       | 0.11<br>(0.01;<br>1.83)                                    | -0.22<br>(-0.43; -<br>0.02) | No intention to treat. Open label. Randomization and allocation concealment not reported. Baseline data confirmed adequacy of randomization. Sample size not justified.                                                                                                                            |
| Wells,<br>1991(135)<br>N = 157, stress<br>UI<br>6 month<br>followup  | Pelvic floor<br>muscle training                                                              | Phenylpropano<br>lamine<br>hydrochloride<br>(50 mg/day-<br>50 mg 2<br>times/day)             | Negative stress<br>test                                 | (77/82)<br>[70/75]     | 1.01<br>(0.93;<br>1.09)                                    | 0.01<br>(-0.07;<br>0.08)    | No Intention to treat. Open label. Randomization and allocation concealment not reported. Baseline data confirmed adequacy of randomization. Sample size not justified                                                                                                                             |
| Janssen,<br>2001(106)<br>N = 530, any<br>UI<br>9 month<br>followup   | Individual pelvic<br>floor muscle<br>training and<br>bladder training                        | Group pelvic<br>floor muscle<br>training and<br>bladder<br>training                          | Improved<br>continence at 3<br>months                   | (118/126)<br>[347/404] | <b>1.09</b><br><b>(1.03;</b><br><b>1.16)</b>               | 0.08<br>(0.02;<br>0.13)     | Intention to treat. Single blind. Stratified by type, severity and duration of incontinence frequency sampling randomization. Allocation concealment not adequate. Baseline data confirmed adequacy of randomization. Sample size not justified.                                                   |
| <b>Improvement in UI</b>                                             |                                                                                              |                                                                                              |                                                         |                        |                                                            |                             |                                                                                                                                                                                                                                                                                                    |
| Subak,<br>2005(138)<br>N = 48, any UI<br>3 month<br>followup         | Weight<br>reduction<br>intervention                                                          | Delayed<br>weight<br>reduction<br>intervention                                               | Improved<br>incontinent<br>episodes/ week               | (22/24)<br>[0/24]      | <b>45.00</b><br><b>(2.89;</b><br><b>701.8</b><br><b>5)</b> |                             | Intention to treat. Single blind (investigators assessing outcomes and statistical analysts). Randomization was stratified by type of incontinence, with randomly permuted blocks of 4. Allocation concealment adequate. Baseline data confirmed adequacy of randomization. Sample size justified. |
| Goode,<br>2003(107)<br>N = 200, stress<br>UI<br>2 month<br>followup  | Behavioral<br>training<br>(biofeedback-<br>assisted pelvic<br>floor muscle<br>training, home | Self-<br>administered<br>behavioral<br>training<br>administered<br>with a self-              | >50% reduction in<br>weekly<br>incontinence<br>episodes | (58/67)<br>[38/67]     | <b>1.53</b><br><b>(1.21;</b><br><b>1.92)</b>               | 0.30<br>(0.15;<br>0.44)     | Intention to treat. Open label. Computer-generated stratified by types and severity of incontinence and race randomization with block size of 6. Allocation concealment unclear. Baseline data confirmed adequacy of                                                                               |

|                                                                                      |                                                                                                                          |                                                                             |                                                |                        |                                                            |                         |                                                                                                                                                                                                                                                            |
|--------------------------------------------------------------------------------------|--------------------------------------------------------------------------------------------------------------------------|-----------------------------------------------------------------------------|------------------------------------------------|------------------------|------------------------------------------------------------|-------------------------|------------------------------------------------------------------------------------------------------------------------------------------------------------------------------------------------------------------------------------------------------------|
|                                                                                      | exercises, bladder control strategies, and self-monitoring with bladder diaries) and pelvic floor electrical stimulation | help booklet                                                                |                                                |                        |                                                            |                         | randomization. Sample size justified.                                                                                                                                                                                                                      |
| Janssen, 2001(106)<br>N = 530, any UI<br>9 month followup                            | Individual pelvic floor muscle training and bladder training                                                             | Group pelvic floor muscle training and bladder training                     | Improved continence at 9 months                | (107/126)<br>[315/404] | 1.09<br>(1.00;<br>1.19)                                    | 0.07<br>(0.00;<br>0.14) | Intention to treat. Single blind. Stratified by type, severity and duration of incontinence frequency sampling randomization. Allocation concealment not adequate. Baseline data confirmed adequacy of randomization. Sample size not justified.           |
| Lagro-Janssen, 1991(152)<br>N = 66, urodynamic stress UI 3 month followup            | Instructions in pelvic floor muscle training                                                                             | No therapy                                                                  | Improved continence                            | (28/33)<br>[0/33]      | <b>57.00</b><br><b>(3.62;</b><br><b>896.3</b><br><b>8)</b> | 0.85<br>(0.72;<br>0.98) | Intention to treat not stated. Open label. Randomization and allocation concealment not reported. Baseline data confirmed adequacy of randomization. Sample size not justified.                                                                            |
| Goode, 2002(154)<br>N = 70, urodynamic bladder dysfunction, urge UI 2 month followup | Sessions of biofeedback-assisted behavioral training by nurse practitioners                                              | Usual care                                                                  | Improved continence                            | (27/33)<br>[19/37]     | <b>1.59</b><br><b>(1.12;</b><br><b>2.27)</b>               | 0.30<br>(0.10;<br>0.51) | No Intention to treat. Single blind. Randomization and allocation concealment unclear. Baseline data confirmed adequacy of randomization. Sample size not justified.                                                                                       |
| Goode, 2003(107)<br>N = 200, stress UI 2 month followup                              | Behavioral training (biofeedback-assisted pelvic floor muscle training, home exercises,                                  | Self-administered behavioral training administered with a self-help booklet | >50% reduction in weekly incontinence episodes | (53/66)<br>[38/67]     | <b>1.42</b><br><b>(1.11;</b><br><b>1.80)</b>               | 0.24<br>(0.08;<br>0.39) | Intention to treat. Open label. Computer-generated stratified by types and severity of incontinence and race randomization with block size of 6. Allocation concealment unclear. Baseline data confirmed adequacy of randomization. Sample size justified. |

|                                                                                    | bladder control strategies, and self-monitoring with bladder diaries)                             |                                       |                                                             |                    |                                                 |                          |                                                                                                                                                                                                                                                                                                    |
|------------------------------------------------------------------------------------|---------------------------------------------------------------------------------------------------|---------------------------------------|-------------------------------------------------------------|--------------------|-------------------------------------------------|--------------------------|----------------------------------------------------------------------------------------------------------------------------------------------------------------------------------------------------------------------------------------------------------------------------------------------------|
| Fantl, 1991(86)<br>N = 131,<br>urodynamic UI<br>1.5 month<br>followup              | Bladder training included participant education; voiding schedule and positive reinforcement      | Usual care                            | >50% reduction in urinary incontinence episodes             | (49/65)<br>[16/66] | <b>3.11</b><br><b>(1.99;</b><br><b>4.87)</b>    | 0.51<br>(0.36;<br>0.66)  | No intention to treat. Open label Randomization stratified by urodynamic incontinence. Allocation concealment unclear. Baseline data confirmed adequacy of randomization. Sample size justified.                                                                                                   |
| Lagro-Janssen, 1991(152)<br>N = 66,<br>urodynamic stress UI<br>3 month<br>followup | Instructions in pelvic floor muscle training                                                      | No therapy                            | Improvement in psychological impact of urinary incontinence | (23/33)<br>[0/33]  | <b>47.00</b><br><b>(2.97;</b><br><b>742.97)</b> | 0.70<br>(0.53;<br>0.86)  | Intention to treat not stated. Open label. Randomization and allocation concealment not reported. Baseline data confirmed adequacy of randomization. Sample size not justified.                                                                                                                    |
| Lagro-Janssen, 1992(99)<br>N = 106, stress or urge UI<br>3 month<br>followup       | Pelvic floor muscle training alone (stress) or bladder training (urge) or its combination (mixed) | Usual care                            | Improved continence                                         | (40/54)<br>[2/56]  | <b>20.74</b><br><b>(5.27;</b><br><b>81.63)</b>  | 0.71<br>(0.58;<br>0.83)  | Intention to treat not stated. Open label. Randomization and allocation concealment not reported. Baseline data confirmed adequacy of randomization. Sample size not justified.                                                                                                                    |
| Subak, 2005(138)<br>N = 48, any UI<br>3 month<br>followup                          | Weight reduction intervention                                                                     | Delayed weight reduction intervention | Reduction in urge incontinent episodes a week               | (17/24)<br>[3/24]  | <b>5.67</b><br><b>(1.91;</b><br><b>16.84)</b>   | 0.58<br>(0.36;<br>0.81)  | Intention to treat. Single blind (investigators assessing outcomes and statistical analysts). Randomization was stratified by type of incontinence, with randomly permuted blocks of 4. Allocation concealment adequate. Baseline data confirmed adequacy of randomization. Sample size justified. |
| Berghmans, 1996, (151)<br>N = 40,<br>urodynamic stress UI<br>3 month               | Pelvic floor muscle training with electromyography biofeedback                                    | Pelvic floor muscle exercise          | Improved continence                                         | (14/20)<br>[14/20] | 1.00<br>(0.67;<br>1.50)                         | 0.00<br>(-0.28;<br>0.28) | Intention to treat Single blind. Computer generated randomization stratified by seriousness of incontinence (grade 1 and 2) and by referral (general practitioner or urologist) with permuted blocks of 4.                                                                                         |

|                                                                              |                                                                                                           |                                       |                                                              |                    |                                                            |                         |                                                                                                                                                                                                                                                                                                    |
|------------------------------------------------------------------------------|-----------------------------------------------------------------------------------------------------------|---------------------------------------|--------------------------------------------------------------|--------------------|------------------------------------------------------------|-------------------------|----------------------------------------------------------------------------------------------------------------------------------------------------------------------------------------------------------------------------------------------------------------------------------------------------|
| followup                                                                     |                                                                                                           |                                       |                                                              |                    |                                                            |                         | Allocation concealment not adequate. Baseline data confirmed adequacy of randomization. Sample size not justified.                                                                                                                                                                                 |
| Lagro-Janssen, 1991(152)<br>N = 66,<br>urodynamic stress UI 3 month followup | Instructions in pelvic floor muscle training                                                              | No therapy                            | Improvement in psychological impact of urinary incontinence  | (23/33)<br>[0/33]  | <b>47.00</b><br><b>(2.97;</b><br><b>742.9</b><br><b>7)</b> | 0.70<br>(0.54;<br>0.86) | Intention to treat not stated. Open label. Randomization and allocation concealment not reported. Baseline data confirmed adequacy of randomization. Sample size not justified.                                                                                                                    |
| McFall, 2000(103)<br>N = 145, any UI 3 month followup                        | Community-based intervention: bladder training, managing the urge to urinate, and pelvic muscle exercises | Usual care                            | >50% reduction in reduction in urinary incontinence episodes | (44/72)<br>[28/73] | <b>1.59</b><br><b>(1.13;</b><br><b>2.25)</b>               | 0.23<br>(0.07;<br>0.39) | No intention to treat. Open label. Randomization and allocation concealment not reported. Baseline data confirmed adequacy of randomization. No justification for sample size.                                                                                                                     |
| Burns, 1993 (100)<br>N = 135,<br>urodynamic stress UI 6 month followup       | Electromyography biofeedback and pelvic floor muscle training                                             | Usual care                            | Improved continence                                          | (24/40)<br>[2/39]  | <b>11.70</b><br><b>(2.96;</b><br><b>46.20)</b>             | 0.55<br>(0.38;<br>0.72) | No Intention to treat. Single-blind. Randomization and allocation concealment not reported. Baseline data confirmed adequacy of randomization. Sample size not justified                                                                                                                           |
| Burns,1990 (155)<br>N = 128, stress or mixed UI 2 month followup             | Biofeedback with vaginal electromyography probe and visual control                                        | Usual care                            | Self reported reduction in urine loss                        | (24/40)<br>[0/40]  | <b>49.00</b><br><b>(3.08;</b><br><b>779.0</b><br><b>7)</b> | 0.60<br>(0.45;<br>0.75) | Intention to treat not stated. Single blind. Randomization with permuted blocks of 10. Allocation concealment not reported. Baseline data confirmed adequacy of randomization. Sample size not justified.                                                                                          |
| Subak, 2005(138)<br>N = 48, any UI 3 month followup                          | Weight reduction intervention                                                                             | Delayed weight reduction intervention | Improvement in total incontinent episodes/ week              | (14/24)<br>[4/24]  | <b>3.50</b><br><b>(1.35;</b><br><b>9.11)</b>               | 0.42<br>(0.17;<br>0.66) | Intention to treat. Single blind (investigators assessing outcomes and statistical analysts). Randomization was stratified by type of incontinence, with randomly permuted blocks of 4. Allocation concealment adequate. Baseline data confirmed adequacy of randomization. Sample size justified. |

|                                                                    |                                                                                                                                                                                                       |                                                                             |                                                         |                    |                                           |                          |                                                                                                                                                                                                                                                            |
|--------------------------------------------------------------------|-------------------------------------------------------------------------------------------------------------------------------------------------------------------------------------------------------|-----------------------------------------------------------------------------|---------------------------------------------------------|--------------------|-------------------------------------------|--------------------------|------------------------------------------------------------------------------------------------------------------------------------------------------------------------------------------------------------------------------------------------------------|
| Goode, 2003(107)<br>N = 200, stress UI<br>2 month followup         | Behavioral training (biofeedback-assisted pelvic floor muscle training, home exercises, bladder control strategies, and self-monitoring with bladder diaries) and pelvic floor electrical stimulation | Self-administered behavioral training administered with a self-help booklet | >75% reduction in weekly incontinence episodes          | (40/67)<br>[30/67] | 1.33<br>(0.96;<br>1.86)                   | 0.15<br>(-0.02;<br>0.32) | Intention to treat. Open label. Computer-generated stratified by types and severity of incontinence and race randomization with block size of 6. Allocation concealment unclear. Baseline data confirmed adequacy of randomization. Sample size justified. |
| Burgio, 2002(153)<br>N = 222, urge or mixed UI<br>2 month followup | Pelvic floor muscle training                                                                                                                                                                          | Self-administered behavioral treatment using a self-help booklet            | Urinary incontinence does not restrict daily activities | (43/74)<br>[31/75] | <b>1.4</b><br><b>(1.0;</b><br><b>2.0)</b> | 0.17<br>(0.01;<br>0.33)  | Intention-to-treat. Open label. Randomization stratified by race, type, and severity of incontinence. Allocation concealment unclear. Baseline data confirmed adequacy of randomization. Sample size justified.                                            |
| Arvonen, 2001(150)<br>N = 37, stress UI<br>4 month followup        | Pelvic floor muscle training program                                                                                                                                                                  | Pelvic floor muscle training program using weighted vaginal balls 50-100g   | Improved continence                                     | (11/19)<br>[7/18]  | 1.49<br>(0.74;<br>2.98)                   | 0.19<br>(-0.13;<br>0.51) | No intention to treat. Open label. Randomization and allocation concealment not reported. Baseline data confirmed adequacy of randomization. Sample size not justified.                                                                                    |
| Goode, 2003(107)<br>N = 200, stress UI<br>2 month followup         | Behavioral training (biofeedback-assisted pelvic floor muscle training, home exercises, bladder control strategies, and self-monitoring                                                               | Self-administered behavioral training administered with a self-help booklet | >75% reduction in weekly incontinence episodes          | (38/66)<br>[30/67] | 1.29<br>(0.92;<br>1.80)                   | 0.13<br>(-0.04;<br>0.30) | Intention to treat. Open label. Computer-generated stratified by types and severity of incontinence and race randomization with block size of 6. Allocation concealment unclear. Baseline data confirmed adequacy of randomization. Sample size justified. |

|                                                                                                                           |                                                                                               |                                                                  |                                                                                   |                                              |                                                             |                                                |                                                                                                                                                                                                                                                          |
|---------------------------------------------------------------------------------------------------------------------------|-----------------------------------------------------------------------------------------------|------------------------------------------------------------------|-----------------------------------------------------------------------------------|----------------------------------------------|-------------------------------------------------------------|------------------------------------------------|----------------------------------------------------------------------------------------------------------------------------------------------------------------------------------------------------------------------------------------------------------|
|                                                                                                                           | with bladder diaries)                                                                         |                                                                  |                                                                                   |                                              |                                                             |                                                |                                                                                                                                                                                                                                                          |
| Diokno, 2004(96)<br>N = 359, continent women (0-5 days of incontinent episodes in the previous year)<br>12 month followup | Behavioral modification program: pelvic floor muscle training, bladder training               | Usual care                                                       | Improved continence                                                               | (92/164)<br>[80/195]                         | <b>1.37</b><br><b>(1.10;</b><br><b>1.70)</b>                | 0.15<br>(0.05;<br>0.25)                        | Intention to treat not stated. Single blind (nurse examiner). Randomizations in blocks of 16 women to provide balanced recruitment between groups. Allocation concealment adequate. Results adjusted to baseline differences. Sample size not justified. |
| Burns, 1993(100)<br>N = 135, urodynamic stress UI<br>6 month followup                                                     | Pelvic floor muscle training                                                                  | Usual care                                                       | Improved continence                                                               | (23/43)<br>[2/39]                            | <b>10.43</b><br><b>(2.63;</b><br><b>41.39)</b>              | 0.48<br>(0.32;<br>0.65)                        | No Intention to treat. Single-blind. Randomization and allocation concealment not reported. Baseline data confirmed adequacy of randomization. Sample size not justified                                                                                 |
| Burns, 1990(155)<br>N = 128, stress or mixed UI<br>2 month followup                                                       | Kegel pelvic floor muscle training                                                            | Usual care                                                       | Self reported reduction in urine loss                                             | (21/38)<br>[0/40]                            | <b>45.21</b><br><b>(2.83;</b><br><b>720.96)</b>             | 0.55<br>(0.39;<br>0.71)                        | No Intention to treat not stated. Single blind. Randomization with permuted blocks of 10. Allocation concealment not reported. Baseline data confirmed adequacy of randomization. Sample size not justified.                                             |
| Subak, 2002(156)<br>N = 152, any UI<br>1.5 month followup                                                                 | Sessions on bladder training by nurse educators and followed individualized voiding schedules | Usual care                                                       | Improved continence                                                               | (39/77)<br>[11/75]                           | <b>3.41</b><br><b>(1.89;</b><br><b>6.15)</b>                | 0.35<br>(0.22;<br>0.49)                        | No Intention to treat. Single blind. Computer based randomization. Allocation concealment unclear. Baseline confirmed adequacy of randomization. Sample size justified.                                                                                  |
| Burgio, 2002(153)<br>N = 222, urge or mixed UI<br>2 month followup                                                        | Biofeedback-assisted behavioral training implemented by nurse                                 | Self-administered behavioral treatment using a self-help booklet | Urinary incontinence does not restrict daily activities<br>Improved continence as | (36/73)<br>[31/75]<br><br>(33/73)<br>[20/75] | 1.19<br>(0.84;<br>1.70)<br><br><b>1.70</b><br><b>(1.08;</b> | 0.08<br>(-0.08;<br>0.24)<br><br>0.19<br>(0.03; | Intention-to-treat. Open label. Randomization stratified by race, type, and severity of incontinence. Allocation concealment unclear. Baseline data confirmed adequacy of randomization. Sample size justified.                                          |

|                                                                                   |                                                                                                                                                  |                                                                                  |                                                             |                    |                                                             |                                  |                                                                                                                                                                                                                                                                                       |
|-----------------------------------------------------------------------------------|--------------------------------------------------------------------------------------------------------------------------------------------------|----------------------------------------------------------------------------------|-------------------------------------------------------------|--------------------|-------------------------------------------------------------|----------------------------------|---------------------------------------------------------------------------------------------------------------------------------------------------------------------------------------------------------------------------------------------------------------------------------------|
|                                                                                   | practitioners<br>Pelvic floor<br>muscle training<br>with 10sec<br>contractions and<br>10 sec relation<br>for 45 min/day                          | to advise<br>pelvic floor<br>muscle<br>training and<br>bladder<br>control        | "much better"<br>Improved<br>continence as<br>"much better" | (36/74)<br>[20/75] | <b>2.66</b><br><b>1.82</b><br><b>(1.17;</b><br><b>2.84)</b> | 0.34)<br>0.22<br>(0.07;<br>0.37) |                                                                                                                                                                                                                                                                                       |
| Bo,1999(80)<br>N = 122,<br>urodynamic<br>stress UI<br>6 month<br>followup         | Pelvic floor<br>muscle training<br>at home and in<br>groups with<br>skilled physical<br>therapists                                               | Use of a<br>continence<br>guard                                                  | Urinary<br>continence and<br>almost continent               | (12/29)<br>[1/32]  | <b>13.24</b><br><b>(1.83;</b><br><b>95.63)</b>              | 0.38<br>(0.19;<br>0.57)          | Intention to treat. Single blind.<br>Computer generated random numbers<br>stratified by baseline leakage.<br>Allocation concealment unclear.<br>Baseline data confirmed adequacy of<br>randomization. Baseline data<br>confirmed adequacy of randomization.<br>Sample size justified. |
| Aksac, 2003;<br>(98)<br>N = 50, stress<br>UI<br>2 month<br>followup               | Pelvic floor<br>muscle training<br>with<br>biofeedback                                                                                           | Usual care                                                                       | Improvement in<br>pad test                                  | (5/20)<br>[2/10]   | 1.25<br>(0.29;<br>5.35)                                     | 0.05<br>(-0.26;<br>0.36)         | Intention to treat not stated.<br>Randomization with choosing closed<br>letters (patients had to pick up closed<br>letters). Allocation concealment not<br>adequate. Baseline data confirmed<br>adequacy of randomization. Sample<br>size not justified.                              |
| Wyman,<br>1998(149)<br>N = 204,<br>urodynamic<br>stress UI<br>6 month<br>followup | Pelvic muscle<br>exercise with<br>biofeedback-<br>assisted<br>instruction<br>Combination of<br>bladder training<br>and pelvic<br>muscle exercise | Bladder<br>training                                                              | 75-99%<br>reduction in<br>incontinence<br>episodes/ week    | (14/69)<br>[9/68]  | 1.53<br>(0.71;<br>3.30)                                     | 0.07<br>(0.05;<br>0.20)          | No intention to treat. Open label.<br>Allocation concealment unclear.<br>Baseline data confirmed adequacy of<br>randomization. Sample size justified.                                                                                                                                 |
| Wells,<br>1991(135)<br>N = 157, stress<br>UI<br>6 month<br>followup               | Pelvic floor<br>muscle training                                                                                                                  | Phenylpropan<br>olamine<br>hydrochloride<br>(50 mg/day-<br>50 mg 2<br>times/day) | Improved<br>continence                                      | (17/82)<br>[29/75] | <b>0.54</b><br><b>(0.32;</b><br><b>0.89)</b>                | -0.18<br>(-0.32; -<br>0.04)      | No Intention to treat. Open label.<br>Randomization and allocation<br>concealment not reported. Baseline<br>data confirmed adequacy of<br>randomization. Sample size not<br>justified                                                                                                 |
| Aksac, 2003;<br>(98)<br>N = 50, stress                                            | Pelvic floor<br>muscle exercise<br>(contractions for                                                                                             | Usual care                                                                       | Improvement in<br>stress urinary<br>incontinence in         | (4/20)<br>[2/10]   | 1.0<br>(0.2;<br>4.6)                                        | 0.00<br>(-0.30;<br>0.30)         | Intention to treat not stated.<br>Randomization with choosing closed<br>letters (patients had to pick up closed                                                                                                                                                                       |

UI  
2 month  
followup

10 seconds and relaxation for 20 seconds) via biofeedback (vaginal probe in electromyography pressure mode) 3 times/week

pad test

letters). Allocation concealment not adequate. Baseline data confirmed adequacy of randomization. Sample size not justified.

**UI**

|                                                                                          |                                                                                                                                                                                    |                                                                          |                                                                                                                                    |                                              |                                                        |                                                            |                                                                                                                                                                                                |
|------------------------------------------------------------------------------------------|------------------------------------------------------------------------------------------------------------------------------------------------------------------------------------|--------------------------------------------------------------------------|------------------------------------------------------------------------------------------------------------------------------------|----------------------------------------------|--------------------------------------------------------|------------------------------------------------------------|------------------------------------------------------------------------------------------------------------------------------------------------------------------------------------------------|
| Bo, 2005(105)<br>N = 47,<br>urodynamic<br>stress UI<br>180 month<br>followup             | Intensive pelvic floor muscle training under the supervision of physical therapist                                                                                                 | Home exercise groups                                                     | Stress UI                                                                                                                          | (19/21)<br>[21/26]                           | 1.12<br>(0.89;<br>1.41)                                | 0.10<br>(-0.10;<br>0.29)                                   | Intention to treat. Open label. Randomization and allocation concealment not reported. Baseline data confirmed adequacy of randomization. Sample size justified.                               |
| Manonai, 2006(157)<br>N = 42, at least one type of UI<br>3 month<br>followup             | Self-selected diet with low fat and low cholesterol foods and soy protein 25g in various forms of soy foods containing more than 50mg/day of isoflavones                           | Self selected diet with low fat and low cholesterol foods                | % of women reporting urgency and mean scores after treatment<br><br>% of women reporting frequency and mean scores after treatment | (21/36)<br>[18/36]<br><br>(18/36)<br>[16/38] | 1.2<br>(0.8;<br>1.8)<br><br>1.1<br>(0.7;<br>1.8)       | 0.08 (-<br>0.15; 0.31)<br><br>0.06<br>(0.17;<br>0.29)      | No intention to treat. Single blind (physician and cytopathologist). Allocation concealment unclear. Baseline data provided with no analysis for incontinence rate. Sample size not justified. |
| McClurg, 2006(158)<br>N = 30,<br>multiple<br>sclerosis and<br>UI<br>24 month<br>followup | Pelvic floor training and advice and electromyography biofeedback<br><br>Pelvic floor training and advice with electromyography biofeedback + neuromuscular electrical stimulation | Pelvic floor training and advice<br><br>Pelvic floor training and advice | UI<br><br>UI                                                                                                                       | (5/10)<br>[8/10]<br><br>(5/10)<br>[8/10]     | 0.63<br>(0.31;<br>1.25)<br><br>0.63<br>(0.31;<br>1.25) | -0.30<br>(-0.70;<br>0.10)<br><br>-0.30<br>(-0.70;<br>0.10) | Intention to treat. Open label. Computer generated randomization list. Allocation concealment unclear. Baseline data confirmed adequacy of randomization. Sample size not justified            |

|                                                                           |                                                                                                                                                                                                     |                                                           |                                                                                            |                                                      |                                                                        |                                                        |                                                                                                                                                                                                                                          |
|---------------------------------------------------------------------------|-----------------------------------------------------------------------------------------------------------------------------------------------------------------------------------------------------|-----------------------------------------------------------|--------------------------------------------------------------------------------------------|------------------------------------------------------|------------------------------------------------------------------------|--------------------------------------------------------|------------------------------------------------------------------------------------------------------------------------------------------------------------------------------------------------------------------------------------------|
| Brown, 2006(95)<br>N = 1,957,<br>continent<br>34.8 month<br>followup      | Intensive lifestyle therapy to lose and maintain at least 7% of initial body weight through a low fat diet and to engage in moderate-intensity physical activity for at least 150 minutes each week | Placebo twice daily                                       | Prevalence of stress UI after treatment<br><br>Urge UI                                     | (206/659<br>[242/650])<br><br>(156/659)<br>[169/660] | 0.85<br>(0.73; 0.99)<br><br>0.92<br>(0.77; 1.12)                       | -0.05<br>(-0.11; 0.003)<br><br>-0.02<br>(-0.07; 0.03)  | Intention to treat. Double-blind. Randomization was stratified by clinical center. Allocation concealment unclear. Baseline data confirmed adequacy of randomization. Sample size justified for the primary outcome-diabetes prevention. |
| Manonai, 2006(157)<br>N = 42, at least one type of UI<br>3 month followup | Self-selected diet with low-fat and low-cholesterol foods and soy protein (50 mg/day of isoflavones)                                                                                                | Self-selected diet with low-fat and low-cholesterol foods | Urge UI                                                                                    | (6/36)<br>[8/36]                                     | 0.75<br>(0.29; 1.94)                                                   | -0.06<br>(-0.24; 0.13)                                 | No intention to treat. Single blind (physician and cytopathologist). Allocation concealment unclear. Baseline data provided with no analysis for incontinence rate. Sample size not justified.                                           |
| Bo, 2005(105)<br>N = 47,<br>urodynamic stress UI<br>180 month followup    | Intensive pelvic floor muscle training under the supervision of physical therapist                                                                                                                  | Home exercise groups                                      | Urge UI                                                                                    | (3/21)<br>[10/26]                                    | 0.37<br>(0.12; 1.18)                                                   | -0.24<br>(-0.48; 0.00)                                 | Intention to treat. Open label. Randomization and allocation concealment not reported. Baseline data confirmed adequacy of randomization. Sample size justified.                                                                         |
| Bo, 2000(159)<br>N = 59,<br>urodynamic stress UI<br>6 month followup      | Pelvic floor muscle training                                                                                                                                                                        | Untreated control group                                   | UI with intercourse                                                                        | (3/29)<br>[13/30]                                    | <b>0.24</b><br><b>(0.08; 0.75)</b>                                     | -0.33<br>(-0.54; -0.12)                                | No Intention to treat. Open label. Computer generated randomization stratified by degree of leakage. Allocation concealment unclear. Baseline data confirmed adequacy of randomization. Sample size justified                            |
| McFall, 2000(103)<br>N = 145, any UI<br>3 month followup                  | Community-based intervention :bladder training, managing the urge to urinate,                                                                                                                       | Usual care                                                | Self reported bothersomeness of urinary incontinence<br><br>Use absorbent pads for urinary | (42/72)<br>[62/73]<br><br>(39/72)<br>[56/73]         | <b>0.7</b><br><b>(0.6; 0.9)</b><br><br><b>0.7</b><br><b>(0.6; 0.9)</b> | -0.27<br>(-0.41; -0.13)<br><br>-0.23<br>(-0.38; -0.07) | No intention to treat. Open label. Randomization and allocation concealment not reported. Baseline data confirmed adequacy of randomization. No justification for sample size.                                                           |

|                                                                           | and performing pelvic muscle exercises                                                                                                                   |                                                                                       | incontinence                                                                                                                                          |                    |                                              |                             |                                                                                                                                                                                                                                         |
|---------------------------------------------------------------------------|----------------------------------------------------------------------------------------------------------------------------------------------------------|---------------------------------------------------------------------------------------|-------------------------------------------------------------------------------------------------------------------------------------------------------|--------------------|----------------------------------------------|-----------------------------|-----------------------------------------------------------------------------------------------------------------------------------------------------------------------------------------------------------------------------------------|
| Manonai, 2006(157)<br>N = 42, at least one type of UI<br>3 month followup | Self-selected diet with low fat and low cholesterol foods and soy protein 25g in various forms of soy foods containing more than 50mg/day of isoflavones | Self selected diet with low fat and low cholesterol foods                             | % of women reporting stress incontinence and mean scores after treatment                                                                              | (18/36)<br>[0/36]  | <b>37.0</b><br><b>(2.3;</b><br><b>591.5)</b> | 0.50<br>(0.33;<br>0.67)     | No intention to treat. Single blind (physician and cytopathologist). Allocation concealment unclear. Baseline data provided with no analysis for incontinence rate. Sample size not justified.                                          |
| Aukee, 2004, (87)<br>N = 35,<br>urodynamic stress UI<br>12 month followup | Pelvic floor training by physiotherapist 5 times/12 weeks with home biofeedback                                                                          | Home program with given verbal and written instructions for home practice             | Gynecologic surgery                                                                                                                                   | (9)<br>[5]         | 1.5<br>(0.6;<br>3.6)                         | 0.16<br>(-0.16;<br>0.48)    | Intention to treat. Open label. Randomization was performed by a random numbers table, in blocks of four. Allocation concealment unclear. Baseline data confirmed adequacy of randomization. Sample size not justified.                 |
| Bo, 2000(159)<br>N = 59,<br>urodynamic stress UI<br>6 month followup      | Pelvic floor muscle exercise with 8-12 maximum contractions in 3 series/day and 45 min/week group sessions                                               | Untreated control group                                                               | Problem with interference with physical activity<br>Problems because of avoiding places and situations<br>Problems with interference with social life | (13/29)<br>[24/30] | <b>0.6</b><br><b>(0.4;</b><br><b>0.9)</b>    | -0.35<br>(-0.58; -<br>0.12) | No Intention to treat. Open label. Computer generated randomization stratified by degree of leakage. Allocation concealment unclear. Baseline data confirmed adequacy of randomization. Sample size justified                           |
| Mørkved, 2002, (85)<br>N = 103<br>urodynamic stress<br>6 months followup  | Pelvic floor muscle training with 3 sets of 10 contractions 3 times/day, individually supervised by a                                                    | Pelvic floor muscle training with 3 sets of 10 contractions 3 times/day, individually | UI is Minor problem<br>UI is Moderate problem                                                                                                         | (17/53)<br>[18/50] | 0.89<br>(0.52;<br>1.53)                      | -0.04<br>(-0.22;<br>0.14)   | Intention to treat. Single blind. Centralized but no computerized randomization stratified by results of a pad test with standardized bladder volume (20 g or less and more than 20 g of leakage). Allocation concealment not adequate. |
|                                                                           |                                                                                                                                                          |                                                                                       |                                                                                                                                                       | (8/53)<br>[5/50]   | 1.51<br>(0.53;<br>4.31)                      | 0.05<br>(-0.08; 0.18)       |                                                                                                                                                                                                                                         |

physical therapist. supervised by  
 At home, 3 sets of a physical  
 10 high intensity therapist. At  
 (close to home, 3 sets  
 maximum) of 10 high  
 intensity  
 contractions per (close to  
 day with a maximum)  
 biofeedback contractions  
 apparatus per day  
 without  
 biofeedback

Baseline data confirmed adequacy of  
 randomization.  
 Sample size justified.

|                                                                               |                                                                                                                                                                                    |                                                                                         |                                                            |                   |                                 |                         |                                                                                                                                                                                                  |
|-------------------------------------------------------------------------------|------------------------------------------------------------------------------------------------------------------------------------------------------------------------------------|-----------------------------------------------------------------------------------------|------------------------------------------------------------|-------------------|---------------------------------|-------------------------|--------------------------------------------------------------------------------------------------------------------------------------------------------------------------------------------------|
| Fantl, 1991(86)<br>N = 131, urodynamic UI<br>1.5 month<br>followup            | Bladder training using 6 weekly visits included patient education; voiding schedule to have micturition from every 30-60 minutes to every 2.5-3 hours; and positive reinforcement. | Usual care                                                                              | Self reported increase in episodes of urinary incontinence | (5/65)<br>[28/66] | <b>0.2</b><br><b>(0.1; 0.4)</b> | -0.35<br>(-0.48; -0.21) | No intention to treat. Open label Randomization stratified by urodynamic incontinence. Allocation concealment unclear. Baseline data confirmed adequacy of randomization. Sample size justified. |
| Lagro-Janssen, 1992(99)<br>N = 106, stress or urge UI<br>3 months<br>followup | Pelvic floor exercises alone (stress) or bladder training (urge) or its combination (mixed)                                                                                        | Usual care                                                                              | Self reported severe urinary incontinence                  | (4/54)<br>[23/56] | <b>0.2</b><br><b>(0.1; 0.5)</b> | -0.34<br>(-0.48; -0.19) | Intention to treat not stated. Open label. Randomization and allocation concealment not reported. Baseline data confirmed adequacy of randomization. Sample size not justified.                  |
| Arvonen, 2001(150)<br>N = 37, stress UI<br>month<br>followup                  | Pelvic floor muscle training program with contractions/relaxations for 5 seconds 10 times 2 times/day                                                                              | Pelvic floor muscle training program with contractions relaxations for 20/20 seconds 10 | Leakage >50g                                               | (1/19)<br>[1/18]  | 0.9<br><b>(0.1; 14.0)</b>       | 0.00<br>(-0.15; 0.14)   | No intention to treat. Open label. Randomization and allocation concealment not reported. Baseline data confirmed adequacy of randomization. Sample size not justified.                          |

|                                                                                            |                                                                                                                                                                                                                                                                                  | times 2<br>times/day<br>using<br>weighted<br>vaginal balls<br>50-100g                                                                                                                                                                       |                                                                                               |                  |                         |                             |                                                                                                                                                                                                                                                                                                                                                |
|--------------------------------------------------------------------------------------------|----------------------------------------------------------------------------------------------------------------------------------------------------------------------------------------------------------------------------------------------------------------------------------|---------------------------------------------------------------------------------------------------------------------------------------------------------------------------------------------------------------------------------------------|-----------------------------------------------------------------------------------------------|------------------|-------------------------|-----------------------------|------------------------------------------------------------------------------------------------------------------------------------------------------------------------------------------------------------------------------------------------------------------------------------------------------------------------------------------------|
| Bo, 2005(105)<br>N = 47,<br>urodynamic<br>stress UI<br>180 month<br>followup               | Intensive pelvic<br>floor exercise<br>with 8-12<br>maximum<br>contractions for<br>6-8 seconds 3<br>series/day under<br>the supervision<br>of physical<br>therapist for 6<br>months                                                                                               | Home<br>exercise<br>groups                                                                                                                                                                                                                  | Self reported<br>severe and<br>very severe<br>urinary<br>incontinence<br>15 years<br>followup | (1/21)<br>[7/26] | 0.2<br>(0.0;<br>1.3)    | -0.22<br>(-0.41; -<br>0.03) | Intention to treat. Open label.<br>Randomization and allocation<br>concealment not reported. Baseline data<br>confirmed adequacy of randomization.<br>Sample size justified.                                                                                                                                                                   |
| Lagro-Janssen,<br>1992(99)<br>N = 106, stress<br>or urge UI<br>3 months<br>followup        | Pelvic floor<br>exercises alone<br>(stress) or<br>bladder training<br>(urge) or its<br>combination<br>(mixed)                                                                                                                                                                    | Usual care                                                                                                                                                                                                                                  | Self reported<br>deterioration<br>in urinary<br>incontinence                                  | (1/54)<br>[2/56] | 0.5<br>(0.0;<br>5.6)    | -0.02<br>(-0.08;<br>0.04)   | Intention to treat not stated. Open<br>label. Randomization and allocation<br>concealment not reported. Baseline<br>data confirmed adequacy of<br>randomization. Sample size not<br>justified.                                                                                                                                                 |
| Mørkved,<br>2002(85)<br>N = 103<br>urodynamic<br>stress<br>6 months<br>6 month<br>followup | Pelvic floor<br>muscle training<br>with 3 sets of 10<br>contractions 3<br>times/day,<br>individually<br>supervised by a<br>physical therapist.<br>At home, 3 sets of<br>10 high intensity<br>(close to<br>maximum)<br>contractions per<br>day with a<br>biofeedback<br>apparatus | Pelvic floor<br>muscle<br>training with<br>3 sets of 10<br>contractions 3<br>times/day,<br>individually<br>supervised by<br>a physical<br>therapist. At<br>home, 3 sets<br>of 10 high<br>intensity<br>(close to<br>maximum)<br>contractions | UI is very<br>problematic                                                                     | (1/53)<br>[3/50] | 0.31<br>(0.03;<br>2.92) | -0.04<br>(-0.12;<br>0.03)   | Intention to treat. Single blind.<br>Centralized but no computerized<br>randomization stratified by results of a<br>pad test with standardized<br>bladder volume (20g or less and more<br>than 20 g of<br>leakage). Allocation concealment not<br>adequate.<br>Baseline data confirmed adequacy of<br>randomization.<br>Sample size justified. |

per day  
without  
biofeedback

---

\* UI = urinary incontinence.
