# Supplementary material
Source: HighWire-hosted journal article supplement (https://www.annals.org/content/suppl/2008/02/12/0000605-200803180-00211)
Supplement: Kane_AT03_148-6-458-DC1-3.pdf [file Kane_AT03_148-6-458-DC1-3.pdf]

Appendix Table 3. Pooled Effects of Pelvic Floor Muscle Training Compared with Regular Care in Women\*

| Continence                            | Estimates                       |        |                                  |        |                              |        |
|---------------------------------------|---------------------------------|--------|----------------------------------|--------|------------------------------|--------|
|                                       | <u>OR, (I-V) (95%CI)</u>        |        | <u>OR, (M-H) (95%CI) (95%CI)</u> |        | <u>Peto OR (95%CI)</u>       |        |
| PFMT+ biofeedback                     | <b>21.36 (3.52; 129.71)</b>     |        | <b>21.36 (3.52; 129.71)</b>      |        | <b>10.59 (3.94; 28.48)</b>   |        |
| Heterogeneity (p value, I-squared,%)  | 0.302                           | 6.00%  | 0.302                            | 6.00%  | 0.192                        | 41.20% |
| PFMT                                  | <b>10.75 (3.80; 30.37)</b>      |        | <b>10.75 (3.80; 30.37)</b>       |        | <b>7.18 (3.58; 14.41)</b>    |        |
| Heterogeneity (p value, I-squared,%)  | 0.697                           | 0.00%  | 0.694                            | 0.00%  | 0.57                         | 0.00%  |
| PFMT+ bladder training                | <b>2.20 (1.18; 4.08)</b>        |        | <b>2.21 (1.18; 4.12)</b>         |        | <b>1.90 (1.34; 2.71)</b>     |        |
| Heterogeneity (p value, I-squared,%)  | 0.17                            | 40.40% | 0.164                            | 41.30% | 0.14                         | 45.30% |
|                                       | <u><b>RR, (I-V) (95%CI)</b></u> |        | <u><b>RR, (M-H) (95%CI)</b></u>  |        |                              |        |
| PFMT+ biofeedback                     | <b>11.17 (2.21; 56.44)</b>      |        | <b>11.17 (2.21; 56.44)</b>       |        |                              |        |
| Heterogeneity (p value, I-squared, %) | 0.695                           | 0.00%  | 0.686                            | 0.00%  |                              |        |
| PFMT                                  | <b>7.13 (2.76; 18.42)</b>       |        | <b>7.13 (2.76; 18.42)</b>        |        |                              |        |
| Heterogeneity (p value, I-squared, %) | 0.937                           | 0.00%  | 0.93                             | 0.00%  |                              |        |
| PFMT+ bladder training                | <b>1.75 (1.07; 2.86)</b>        |        | <b>1.77 (1.07; 2.94)</b>         |        |                              |        |
| Heterogeneity (p value, I-squared, %) | 0.143                           | 44.80% | 0.127                            | 47.40% |                              |        |
|                                       | <u><b>RD, (I-V) (95%CI)</b></u> |        | <u><b>RD, (M-H) (95%CI)</b></u>  |        |                              |        |
| PFMT                                  | 0.33 (0.10; 0.57)               |        | 0.33 (0.10; 0.57)                |        |                              |        |
| Heterogeneity (p value, I-squared, %) | 0                               | 87.30% | 0                                | 87.30% |                              |        |
| PFMT+ bladder training                | <b>0.13 (0.07; 0.20)</b>        |        | <b>0.13 (0.07; 0.20)</b>         |        |                              |        |
| Heterogeneity (p value, I-squared, %) | 0.595                           | 0.00%  | 0.571                            | 0.00%  |                              |        |
| <b>Improvement in UI</b>              |                                 |        |                                  |        |                              |        |
|                                       | <u><b>OR, (I-V) (95%CI)</b></u> |        | <u><b>OR, (M-H) (95%CI)</b></u>  |        | <u><b>Peto OR(95%CI)</b></u> |        |
| PFMT+ biofeedback                     | 5.19 (0.98; 27.44)              |        | 5.19 (0.97; 27.75)               |        | 5.47 (2.90; 10.33)           |        |
| Heterogeneity (p value, I-squared, %) | 0.024                           | 73.20% | 0.023                            | 73.50% | 0.044                        | 67.90% |
| PFMT                                  | 17.73 ( 1.14; 276.58)           |        | 17.83 (1.09; 292.06)             |        | 12.11 (6.46; 22.71)          |        |
| Heterogeneity (p value, I-squared, %) | 0.004                           | 81.80% | 0.003                            | 82.40% | 0.007                        | 79.70% |
| PFMT+ bladder training                | 5.37 (1.86; 15.50)              |        | 5.40 (1.84; 15.83)               |        | 3.24 (2.43; 4.32)            |        |
| Heterogeneity (p value, I-squared, %) | 0                               | 88.10% | 0                                | 88.50% | 0                            | 90.10% |
|                                       | <u><b>RR, (I-V) (95%CI)</b></u> |        | <u><b>RR, (M-H) (95%CI)</b></u>  |        |                              |        |
| PFMT+ biofeedback                     | 2.52 (0.72; 8.79)               |        | 2.57 (0.57; 11.63)               |        |                              |        |
| Heterogeneity (p value, I-squared, %) | 0.02                            | 75.40% | 0.00                             | 83.10% |                              |        |
| PFMT                                  | 7.15 (1.00; 51.34)              |        | 7.44 (0.82; 67.67)               |        |                              |        |
| Heterogeneity (p value, I-squared, %) | 0.02                            | 73.60% | 0.01                             | 79.00% |                              |        |
| PFMT+ bladder training                | 2.53 (1.38; 4.63)               |        | 2.62 (1.35; 5.12)                |        |                              |        |
| Heterogeneity (p value, I-squared, %) | 0.00                            | 86.20% | 0.00                             | 88.80% |                              |        |
|                                       | <u><b>RD, (I-V) (95%CI)</b></u> |        | <u><b>RD, (M-H) (95%CI)</b></u>  |        |                              |        |
| PFMT+ biofeedback                     | 0.31 (0.02; 0.60)               |        | 0.31 (0.02; 0.60)                |        |                              |        |
| Heterogeneity (p value, I-squared, %) | 0.00                            | 80.90% | 0.01                             | 81.00% |                              |        |

|                                       |                   |                   |  |
|---------------------------------------|-------------------|-------------------|--|
| PFMT                                  | 0.48 (0.09; 0.88) | 0.48 (0.07; 0.90) |  |
| Heterogeneity                         | 0.00 92.60%       | 0.00 93.40%       |  |
| PFMT+ bladder training                | 0.36 (0.10; 0.61) | 0.36 (0.10; 0.62) |  |
| Heterogeneity (p value, I-squared, %) | 0.00 93.60%       | 0.00 94.00%       |  |

\*Pooled odds ratio, relative risk, and risk difference were calculated with random effects models using inverse variance or Mantel-Haenszel methods. I-V = inverse variance; MH = Mantel-Haenszel; OR = odds ratio; RD = risk difference; RR = relative risk.
