# Supplementary material
Source: HighWire-hosted journal article supplement (https://www.annals.org/content/suppl/2008/02/12/0000605-200803180-00211)
Supplement: Kane_AT04_148-6-458-DC1-4.pdf [file Kane_AT04_148-6-458-DC1-4.pdf]

Appendix Table 4. The Effects of Physical Rehabilitation Therapies on Female Urinary Incontinence: Results from Randomized Controlled Clinical Trials\*

| Author Sample Followup                                    | Active Treatment                                     | Control Treatment                             | Outcome                                               | (Events/<br>Active Treatment)<br>[Events/Control<br>Treatment] | Relative<br>Risk<br>(95%<br>CI)                 | Risk<br>Differenc<br>e<br>(95%CI) | Quality Issues                                                                                                                                                                |
|-----------------------------------------------------------|------------------------------------------------------|-----------------------------------------------|-------------------------------------------------------|----------------------------------------------------------------|-------------------------------------------------|-----------------------------------|-------------------------------------------------------------------------------------------------------------------------------------------------------------------------------|
| <b>Improvement or continence</b>                          |                                                      |                                               |                                                       |                                                                |                                                 |                                   |                                                                                                                                                                               |
| But, 2003(113)<br>N = 52, any UI<br>2 month followup      | Functional magnetic stimulation with Pulsegen device | Placebo treatment with sham not active device | Self Reported resolved urge UI                        | (24/30)<br>[5/22]                                              | <b>3.52</b><br><b>(1.60;</b><br><b>7.76)</b>    | 0.57<br>(0.35;<br>0.80)           | No intention to treat. Double-blind. Randomization and allocation concealment not reported. Baseline data confirmed adequacy of randomization. Sample size not justified.     |
|                                                           |                                                      |                                               | Self Reported Continence                              | (12/30)<br>[0/22]                                              | <b>18.55</b><br><b>(1.16;</b><br><b>297.42)</b> | 0.40<br>(0.22;<br>0.58)           |                                                                                                                                                                               |
|                                                           |                                                      |                                               | Reduction in urge urinary incontinence at night       | (11/30)<br>[4/22]                                              | 2.02<br>(0.74;<br>5.50)                         | 0.18<br>(-0.05;<br>0.42)          |                                                                                                                                                                               |
|                                                           |                                                      |                                               | Reduction in urge urinary incontinence during the day | (7/30)<br>[1/22]                                               | 5.13<br>(0.68;<br>38.77)                        | 0.19<br>(0.01;<br>0.36)           |                                                                                                                                                                               |
| But, 2005(160)<br>N = 39, mixed UI<br>2 month followup    | Functional magnetic stimulation applied continuously | Sham inactive device                          | Self Reported Continence                              | (17/23)<br>[11/16]                                             | 1.08<br>(0.71;<br>1.62)                         | 0.05<br>(-0.24;<br>0.34)          | No intention to treat. Double blind. Randomization and allocation concealment not reported. Baseline data not reported. Sample size not justified.                            |
|                                                           |                                                      |                                               | Improvement in mixed urinary incontinence             | (11/26)<br>[3/13]                                              | 1.83<br>(0.62;<br>5.45)                         | 0.19<br>(-0.11;<br>0.49)          |                                                                                                                                                                               |
| Luber, 1997(109)<br>N = 57, stress UI<br>3 month followup | Functional electrical stimulation                    | Sham stimulation with inactive device         | Negative stress test                                  | (3/20)<br>[3/24]                                               | 1.20<br>(0.27;<br>5.30)                         | 0.03<br>(-0.18;<br>0.23)          | Double-blind. Randomization using the table of random numbers. Allocation concealment not adequate. Baseline data confirmed adequacy of randomization. Sample size justified. |

|                                                                                       |                                                                                                                                          |                                                                 |                                                                     |                  |                          |                           |                                                                                                                                                                                                                                               |
|---------------------------------------------------------------------------------------|------------------------------------------------------------------------------------------------------------------------------------------|-----------------------------------------------------------------|---------------------------------------------------------------------|------------------|--------------------------|---------------------------|-----------------------------------------------------------------------------------------------------------------------------------------------------------------------------------------------------------------------------------------------|
| Pages,2001(79)<br>N = 51,<br>urodynamic stress UI<br>1 month followup                 | Specific physical therapy program: Group therapy and home pelvic floor muscle training, recommendation of weight loss and aerobic sports | Biofeedback training in group and individually with biofeedback | Self Reported Continence                                            | (6/27)<br>[4/13] | 0.72<br>(0.25;<br>2.12)  | -0.09<br>(-0.38;<br>0.21) | No intention to treat. Open label. Randomization and allocation concealment unclear. Baseline data not reported. Sample size not justified.                                                                                                   |
| Smith, 1996(108)<br>N = 57,<br>stress UI and detrusor instability<br>4 month followup | Electrical stimulation                                                                                                                   | Kegel exercise                                                  | Self Reported Continence                                            | (2/9)<br>[1/9]   | 2.00<br>(0.22;<br>18.33) | 0.11<br>(-0.23;<br>0.45)  | Intention to treat not stated. Open label. Randomization and allocation concealment not reported. Baseline data confirmed adequacy of randomization. Sample size not justified.                                                               |
|                                                                                       |                                                                                                                                          |                                                                 | Improved Urinary Incontinence among those with detrusor instability | (4/18)<br>[1/9]  | 2.00<br>(0.26;<br>15.38) | 0.11<br>(-0.17;<br>0.39)  |                                                                                                                                                                                                                                               |
| Sand, 1995(84)<br>N = 52,<br>urodynamic stress UI<br>3.75 month followup              | Active pelvic floor stimulator                                                                                                           | Sham inactive device.                                           | Self Reported Continence                                            | (7/35)<br>[2/17] | 1.70<br>(0.39;<br>7.33)  | 0.08<br>(-0.12;<br>0.28)  | Intention to treat. Double-blind. Computer-generated random numbers with blocks at a 2:1 rate favoring active over placebo devices. Allocation concealment unclear. Baseline data confirmed adequacy of randomization. Sample size justified. |
| Luber, 1997(109)<br>N = 57,<br>stress UI<br>3 month followup                          | Functional electrical stimulation                                                                                                        | Sham stimulation with inactive device                           | Negative stress test                                                | (3/20)<br>[3/24] | 1.20<br>(0.27;<br>5.30)  | 0.03<br>(-0.18;<br>0.23)  | Double-blind. Randomization using the table of random numbers. Allocation concealment not adequate. Baseline data confirmed adequacy of randomization. Sample size justified.                                                                 |
|                                                                                       |                                                                                                                                          |                                                                 | Self Reported Continence                                            | (2/20)<br>[4/24] | 0.60<br>(0.12;<br>2.94)  | -0.07<br>(-0.27;<br>0.13) |                                                                                                                                                                                                                                               |

|                                                                                 |                                                                                                                                                                                                                                             |                                                                                                                                                                                                                                        |                                                                                |                    |                          |                          |                                                                                                                                                                                                                                                                  |
|---------------------------------------------------------------------------------|---------------------------------------------------------------------------------------------------------------------------------------------------------------------------------------------------------------------------------------------|----------------------------------------------------------------------------------------------------------------------------------------------------------------------------------------------------------------------------------------|--------------------------------------------------------------------------------|--------------------|--------------------------|--------------------------|------------------------------------------------------------------------------------------------------------------------------------------------------------------------------------------------------------------------------------------------------------------|
| Bo,1999(80)<br>N = 122,<br>urodynamic<br>stress UI<br>6 month<br>followup       | Electrical<br>stimulation                                                                                                                                                                                                                   | Use of a<br>continence<br>guard                                                                                                                                                                                                        | Self Reported<br>Continence                                                    | (3/32)<br>[1/32]   | 3.00<br>(0.33;<br>27.33) | 0.06<br>(-0.06;<br>0.18) | Intention to treat. Single blind. Computer generated random numbers stratified by baseline leakage. Allocation concealment unclear. Baseline data confirmed adequacy of randomization. Baseline data confirmed adequacy of randomization. Sample size justified. |
| Amaro,<br>2006(88)<br>N = 40,<br>predominant<br>urge UI<br>2 month<br>followup  | Effective<br>intravaginal<br>electrical<br>stimulation                                                                                                                                                                                      | Sham<br>intravaginal<br>electrical<br>stimulation                                                                                                                                                                                      | Reduction in<br>urge urinary<br>incontinence                                   | (17/20)<br>[14/20] | 1.21<br>(0.86;<br>1.71)  | 0.15<br>(-0.10;<br>0.40) | Double blind. Randomization and allocation concealment unclear. Baseline data confirmed adequacy of randomization. Sample size justified.                                                                                                                        |
| Pages,2001<br>(79)<br>N = 51,<br>urodynamic<br>stress UI<br>1 month<br>followup | Specific<br>physical<br>therapy<br>program.<br>Group therapy<br>5 time/week<br>and home<br>pelvic floor<br>exercise with<br>50 contractions<br>for 10 minutes<br>2 times/day.<br>Recommendati<br>on of weight<br>loss and<br>aerobic sports | Biofeedback<br>training and<br>stimulation<br>daily 90<br>minutes in<br>group and<br>individually<br>for 15<br>minutes, 5<br>times/week.<br>Intra vaginal<br>pressure<br>sensor and<br>visual<br>biofeedback<br>in computer<br>monitor | Fewer stress<br>urinary<br>incontinence<br>episodes (-<br>50%) and<br>symptoms | (20/27)<br>[9/13]  | 1.1<br>(0.7;<br>1.6)     | 0.05<br>(-0.25;<br>0.35) | No intention to treat. Open label. Randomization and allocation concealment unclear. Baseline data not reported. Sample size not justified.                                                                                                                      |

|                                                                                                |                                                                                                                                                                                                                                                                                |                                                                                                 |                                                                    |                   |                         |                          |                                                                                                                                                                                                                                               |
|------------------------------------------------------------------------------------------------|--------------------------------------------------------------------------------------------------------------------------------------------------------------------------------------------------------------------------------------------------------------------------------|-------------------------------------------------------------------------------------------------|--------------------------------------------------------------------|-------------------|-------------------------|--------------------------|-----------------------------------------------------------------------------------------------------------------------------------------------------------------------------------------------------------------------------------------------|
| Spruijt, 2003(114)<br>N = 51,<br>stress, urge<br>or mixed<br>UI<br>2 month<br>followup         | Intravaginal<br>electrical<br>stimulation of<br>the pelvic floor<br>using<br>stimulator<br>generated<br>biphasic<br>current pulses<br>with a duration<br>of ms and a<br>frequency of<br>50Hz (stress<br>urinary<br>incontinence)<br>or 20Hz (urge<br>urinary<br>incontinence). | Kegel<br>exercise<br>program with<br>verbal<br>instructions<br>on how to<br>exercise at<br>home | % of improved<br>pelvic muscle<br>strength                         | (18/25)<br>[5/12] | 1.7<br>(0.8;<br>3.5)    | 0.30<br>(-0.03;<br>0.63) | No intention to treat. Open label. Blocked randomization. Allocation concealment not reported. Baseline data confirmed adequacy of randomization. Sample size justified.                                                                      |
| Smith, 1996(108)<br>N = 57,<br>stress UI and<br>detrusor<br>instability<br>4 month<br>followup | Electrical<br>stimulation<br>using<br>frequency 12.5<br>Hz. -50 Hz and<br>amplitude 5-<br>25mA for 15 to<br>60 min<br>2/dayday                                                                                                                                                 | Kegel<br>exercise                                                                               | Improved<br>continence in<br>women with<br>Detrusor<br>instability | (9/18)<br>[3/9]   | 1.50<br>(0.53;<br>4.21) | 0.17<br>(-0.22;<br>0.55) | Intention to treat not stated. Open label. Randomization and allocation concealment not reported. Baseline data confirmed adequacy of randomization. Sample size not justified.                                                               |
| Sand, 1995(84)<br>N = 52,<br>urodynamic<br>stress UI<br>3.75 month<br>followup                 | Active pelvic<br>floor stimulator                                                                                                                                                                                                                                              | Sham<br>inactive<br>device                                                                      | Self Reported<br>Continence                                        | (7/35)<br>[2/17]  | 1.70<br>(0.39;<br>7.33) | 0.28<br>(0.04;<br>0.53)  | Intention to treat. Double-blind. Computer-generated random numbers with blocks at a 2:1 rate favoring active over placebo devices. Allocation concealment unclear. Baseline data confirmed adequacy of randomization. Sample size justified. |

|                                                                                                                                |                                                                                                                                                                                      |                                                                                                 |                                                                                                                                    |                    |                                              |                          |                                                                                                                                                                                                                                                                                                  |
|--------------------------------------------------------------------------------------------------------------------------------|--------------------------------------------------------------------------------------------------------------------------------------------------------------------------------------|-------------------------------------------------------------------------------------------------|------------------------------------------------------------------------------------------------------------------------------------|--------------------|----------------------------------------------|--------------------------|--------------------------------------------------------------------------------------------------------------------------------------------------------------------------------------------------------------------------------------------------------------------------------------------------|
| Spruijt, 2003(114)<br>N = 51,<br>stress, urge<br>or mixed<br>UI<br>2 month<br>followup                                         | Intravaginal<br>electrical<br>stimulation<br>with duration<br>of 1ms and a<br>frequency of<br>50Hz (stress<br>urinary<br>incontinence)<br>or 20Hz (urge<br>urinary<br>incontinence). | Kegel<br>exercise<br>program with<br>verbal<br>instructions<br>on how to<br>exercise at<br>home | % with<br>improved<br>subjective<br>outcome<br>variables<br>PRAFAB<br>score<br>% with<br>improved<br>frequency of<br>urine leakage | (11/25)<br>[5/12]  | 1.1<br>(0.5;<br>2.4)                         | 0.02<br>(-0.32;<br>0.36) | No intention to treat. Open label. Blocked randomization. Allocation concealment not reported. Baseline data confirmed adequacy of randomization. Sample size justified.                                                                                                                         |
|                                                                                                                                |                                                                                                                                                                                      |                                                                                                 |                                                                                                                                    | (11/25)<br>[3/12]  | 1.8<br>(0.6;<br>5.2)                         | 0.19<br>(-0.12;<br>0.50) |                                                                                                                                                                                                                                                                                                  |
| Smith, 1996(108)<br>N = 57,<br>stress UI and<br>detrusor<br>instability<br>48 month<br>followup                                | Electrical<br>stimulation<br>using<br>frequency 12.5<br>Hz. -50 Hz and<br>amplitude 5-<br>10mA-80mA<br>for 15 to 60<br>min 2/day                                                     | Kegel<br>exercise                                                                               | Improved<br>continence in<br>women with<br>stress UI                                                                               | (4/9)<br>[3/9]     | 1.33<br>(0.41;<br>4.33)                      | 0.11<br>(-0.34;<br>0.56) | Intention to treat not stated. Open label. Randomization and allocation concealment not reported. Baseline data confirmed adequacy of randomization. Sample size not justified.                                                                                                                  |
| Sand, 1995(84)<br>N = 52,<br>urodynamic<br>stress UI<br>3.75 month<br>followup                                                 | Active pelvic<br>floor gradually<br>adjusted<br>stimulator                                                                                                                           | Sham<br>inactive<br>device                                                                      | Improvement<br>by 50% in<br>voiding diary                                                                                          | (13/35)<br>[2/17]  | 3.16<br>(0.80;<br>12.44)                     | 0.25<br>(0.03;<br>0.48)  | Intention to treat. Double-blind. Computer-generated random numbers with blocks at a 2:1 rate favoring active over placebo devices. Allocation concealment unclear. Baseline data confirmed adequacy of randomization. Sample size justified.                                                    |
| Brubaker, 1997(161)<br>N = 148,<br>detrusor<br>instability or<br>urodynamic<br>stress, or<br>mixed UI<br>2.5 month<br>followup | Transvaginal<br>electric<br>stimulation                                                                                                                                              | Sham<br>inactive<br>device                                                                      | Improved<br>continence                                                                                                             | (21/60)<br>[10/61] | <b>2.14</b><br><b>(1.10;</b><br><b>4.14)</b> | 0.19<br>(0.03;<br>0.34)  | No intention to treat. Double-blind. Computer generated randomization stratified by incontinence type. Allocation concealment unclear but centralized data manager blinded for treatment status analyzed the data. Baseline data confirmed adequacy of randomization. Sample size not justified. |

|                                                                                                                                |                                                                  |                                 |                                                         |                    |                          |                           |                                                                                                                                                                                                                                                                                                                       |
|--------------------------------------------------------------------------------------------------------------------------------|------------------------------------------------------------------|---------------------------------|---------------------------------------------------------|--------------------|--------------------------|---------------------------|-----------------------------------------------------------------------------------------------------------------------------------------------------------------------------------------------------------------------------------------------------------------------------------------------------------------------|
| Spruijt, 2003(114)<br>N = 51,<br>stress, urge<br>or mixed<br>UI<br>2 month<br>followup                                         | Intravaginal<br>electrical<br>stimulation                        | Kegel<br>exercise<br>program    | Improved<br>continence                                  | (7/25)<br>[4/12]   | 0.84<br>(0.30;<br>2.32)  | -0.05<br>(-0.37;<br>0.27) | No intention to treat. Open label. Blocked<br>randomization. Allocation concealment<br>not reported. Baseline data confirmed<br>adequacy of randomization. Sample size<br>justified.                                                                                                                                  |
|                                                                                                                                |                                                                  |                                 | Reduced<br>amount of<br>urine loss                      | (7/25)<br>[3/12]   | 1.12<br>(0.35;<br>3.59)  | 0.03<br>(-0.27;<br>0.33)  |                                                                                                                                                                                                                                                                                                                       |
|                                                                                                                                |                                                                  |                                 | Improvement<br>in detrusor<br>instability               | (6/25)<br>[3/12]   | 0.96<br>(0.29;<br>3.20)  | -0.01<br>(-0.31;<br>0.29) |                                                                                                                                                                                                                                                                                                                       |
| Bo, 1999(80)<br>N = 122,<br>urodynamic<br>stress UI<br>6 month<br>followup                                                     | Electrical<br>stimulation                                        | Use of a<br>continence<br>guard | Self Reported<br>Continence                             | (3/32)<br>[1/32]   | 3.00<br>(0.33;<br>27.33) | 0.06<br>(-0.06;<br>0.18)  | Intention to treat. Single blind. Computer<br>generated random numbers stratified by<br>baseline leakage. Allocation concealment<br>unclear. Baseline data confirmed<br>adequacy of randomization. Baseline data<br>confirmed adequacy of randomization.<br>Sample size justified.                                    |
| <b>UI</b>                                                                                                                      |                                                                  |                                 |                                                         |                    |                          |                           |                                                                                                                                                                                                                                                                                                                       |
| But, 2005(160)<br>N = 39,<br>mixed UI<br>2 month<br>followup                                                                   | Functional<br>magnetic<br>stimulation<br>applied<br>continuously | Sham<br>inactive<br>device      | Incidence of<br>idiopathic<br>detrusor over<br>activity | (1/26)<br>[3/13]   | 0.17<br>(0.02;<br>1.45)  | -0.19<br>(-0.43;<br>0.05) | No intention to treat. Double blind.<br>Randomization and allocation<br>concealment not reported. Baseline data<br>not reported. Sample size not justified.                                                                                                                                                           |
| Brubaker, 1997(161)<br>N = 148,<br>detrusor<br>instability or<br>urodynamic<br>stress, or<br>mixed UI<br>2.5 month<br>followup | Transvaginal<br>electric<br>stimulation                          | Sham<br>inactive<br>device      | Urodynamic<br>diagnosis of<br>detrusor over<br>activity | (16/60)<br>[25/61] | 0.63<br>(0.38;<br>1.06)  | -0.15<br>(-0.32;<br>0.01) | No intention to treat. Double-blind.<br>Computer generated randomization<br>stratified by incontinence type. Allocation<br>concealment unclear but centralized data<br>manager blinded for treatment status<br>analyzed the data. Baseline data<br>confirmed adequacy of randomization.<br>Sample size not justified. |

|                                                                                             |                                                                                                                                                                                     |                                                                                                 |                                                                                                         |                                           |                                                   |                                                          |                                                                                                                                                                                                                 |
|---------------------------------------------------------------------------------------------|-------------------------------------------------------------------------------------------------------------------------------------------------------------------------------------|-------------------------------------------------------------------------------------------------|---------------------------------------------------------------------------------------------------------|-------------------------------------------|---------------------------------------------------|----------------------------------------------------------|-----------------------------------------------------------------------------------------------------------------------------------------------------------------------------------------------------------------|
| Emmons, 2005(89)<br>N = 85,<br>overactive<br>bladder with<br>urge UI<br>4 month<br>followup | Acupuncture<br>treatment<br>expected to<br>improve<br>bladder<br>symptoms                                                                                                           | Placebo<br>acupuncture<br>treatment<br>designed to<br>promote<br>relaxation                     | Proportion of<br>subjects with<br>detrusor<br>contractions<br>during<br>cystometry                      | (7/44)<br>[11/41]                         | 0.59<br>(0.25;<br>1.38)                           | -0.11<br>(-0.28;<br>0.06)                                | No intention to treat. Single-blind. Computer-generated randomization with random numbers table. Allocation concealment not adequate. Baseline data confirmed adequacy of randomization. Sample size justified. |
| Amaro, 2006(88)<br>N = 40,<br>predominant<br>urge UI<br>2.75 month<br>followup              | Effective<br>Intravaginal<br>electrical<br>stimulation                                                                                                                              | Sham<br>Intravaginal<br>electrical<br>stimulation                                               | Urge urinary<br>incontinence<br>at 1 month<br>follow up                                                 | (3/20)<br>[6/20]                          | 0.5<br>(0.1;<br>1.7)                              | -0.15<br>(-0.40;<br>0.10)                                | Double blind. Randomization and allocation concealment unclear. Baseline data confirmed adequacy of randomization. Sample size justified.                                                                       |
| Spruijt, 2003(114)<br>N = 51,<br>stress, urge<br>or mixed<br>UI<br>2 month<br>followup      | Intravaginal<br>electrical<br>stimulation<br>with duration<br>of 1msec and<br>frequency of<br>50Hz (stress<br>urinary<br>incontinence)<br>or 20Hz (urge<br>urinary<br>incontinence) | Kegel<br>exercise<br>program with<br>verbal<br>instructions<br>on how to<br>exercise at<br>home | % with<br>deterioration of<br>urinary<br>incontinence<br>% with<br>unchanged<br>urinary<br>incontinence | (6/25)<br>[7/12]<br><br>(11/25)<br>[1/12] | 0.4<br>(0.2;<br>1.0)<br><br>5.3<br>(0.8;<br>36.3) | 0.36<br>(0.11;<br>0.61)<br><br>-0.34<br>(-0.67;<br>0.02) | No intention to treat. Open label. Blocked randomization. Allocation concealment not reported. Baseline data confirmed adequacy of randomization. Sample size justified.                                        |

\*Bold- significant differences at 95% confidence level. UI = urinary incontinence.
