# Supplementary material
Source: HighWire-hosted journal article supplement (https://www.annals.org/content/suppl/2008/02/12/0000605-200803180-00211)
Supplement: Kane_AT05_148-6-458-DC1-5.pdf [file Kane_AT05_148-6-458-DC1-5.pdf]

Appendix Table 5. The Effects of Injectable Bulking Agents on Female Urinary Incontinence: Results from Randomized Controlled Clinical Trials\*

| Author Sample Followup                                                                                | Active Treatment                                                                                                                                    | Control Treatment                                                                                         | Outcome                  | Events /Active Treatment ) [Events/Control Treatment ] | Relative Risk (95% CI)              | Risk Difference (95%CI) | Quality Issues                                                                                                                                                                                                                  |
|-------------------------------------------------------------------------------------------------------|-----------------------------------------------------------------------------------------------------------------------------------------------------|-----------------------------------------------------------------------------------------------------------|--------------------------|--------------------------------------------------------|-------------------------------------|-------------------------|---------------------------------------------------------------------------------------------------------------------------------------------------------------------------------------------------------------------------------|
| Strasser, 2007(115)<br>N = 63,<br>intrinsic sphincter insufficiency or stress UI<br>12 month followup | Transurethral ultrasonography -guided injections of autologous myoblasts and fibroblasts; regular training and trans vaginal electrical stimulation | Conventional endoscopic injections of collagen; regular training and trans vaginal electrical stimulation | Self Reported Continence | (38/42) [2/21]                                         | <b>9.50</b><br><b>(2.53; 35.63)</b> | 0.81<br>(0.66; 0.96)    | Intention to treat. Single blind. Computer-generated randomization list with permuted blocks and ratio of 2:1. Allocation concealment unclear. Baseline data confirmed adequacy of randomization. Sample size not justified.    |
| Bano, 2005(83)<br>N = 50,<br>urodynamic stress UI<br>6 month followup                                 | Peri or transurethral porcine dermal implant injection (Permacol)                                                                                   | Transurethral silicone injection (Macroplastique)                                                         | Negative pad test        | (15/25) [9/25]                                         | 1.67<br>(0.90; 3.08)                | 0.24<br>(-0.03; 0.51)   | No Intention to treat. Open label. Randomization and allocation concealment not reported. Baseline data confirmed adequacy of randomization. Sample size not justified.                                                         |
| Corcos, 2005(67)<br>N = 133, stress UI<br>13 month followup                                           | Intraurethral collagen sub mucosal injection                                                                                                        | Surgery (needle bladder neck suspensions, Burch, and slings).                                             | Negative pad test        | (34/66) [37/67]                                        | 0.93<br>(0.68; 1.28)                | -0.04<br>(-0.21; 0.13)  | Intention to treat. Centralized randomization stratified by center with randomly distributed blocks 4 and 6 in size. Allocation concealment adequate. Baseline data confirmed adequacy of randomization. Sample size justified. |

|                                                                                                      |                                                                                            |                                                                                          |                                                                                               |                   |                   |                     |                                                                                                                                                                                                      |
|------------------------------------------------------------------------------------------------------|--------------------------------------------------------------------------------------------|------------------------------------------------------------------------------------------|-----------------------------------------------------------------------------------------------|-------------------|-------------------|---------------------|------------------------------------------------------------------------------------------------------------------------------------------------------------------------------------------------------|
| Schulz, 2004(82)<br>N = 40,<br>urodynamic stress or mixed UI<br>12 month followup                    | Periurethral route of injection of bulking agent-dextran copolymer                         | Transurethral route of injection of bulking agent-dextran copolymer                      | Negative pad test                                                                             | (1/20) [3/20]     | 0.33 (0.04; 2.94) | -0.10 (-0.28; 0.08) | Intention to treat. Open label. Computer generated block randomization scheme. Allocation concealment not reported. Baseline data confirmed adequacy of randomization. Sample size not justified.    |
| Bano, 2005(83)<br>N = 50,<br>urodynamic stress UI<br>6 month followup                                | Peri or transurethral porcine dermal implant injection (Permacol)                          | Transurethral silicone injection (Macroplastique)                                        | Improvement in pad test                                                                       | (15/25) [10/25]   | 1.50 (0.84; 2.67) | 0.20 (-0.07; 0.47)  | No Intention to treat. Open label. Randomization and allocation concealment not reported. Baseline data confirmed adequacy of randomization. Sample size not justified.                              |
|                                                                                                      |                                                                                            |                                                                                          | Improved urinary incontinence scores (Stamey)                                                 | (14/25) [10/25]   | 1.40 (0.77; 2.53) | 0.16 (-0.11; 0.43)  |                                                                                                                                                                                                      |
|                                                                                                      |                                                                                            |                                                                                          | Improved urinary incontinence scores (Kings College Hospital Quality of Health Questionnaire) | (14/25) [7/25]    | 2.00 (0.98; 4.10) | 0.28 (0.02; 0.54)   |                                                                                                                                                                                                      |
| Appell, 2006(68)<br>N = 173,<br>stress UI<br>12 month followup                                       | Transurethral radiofrequency energy collagen micro-remodeling                              | The sham treatment                                                                       | Improvement >10 point I-QOL score                                                             | (53/110) [28/63]  | 1.08 (0.77; 1.52) | 0.04 (-0.12; 0.19)  | No intention to treat. Single blind. Computer generated randomization with ratio 2:1. Allocation concealment not reported. Baseline data confirmed adequacy of randomization. Sample size justified. |
| Lightner, 2001(162)<br>N = 355,<br>intrinsic sphincter deficiency and stress UI<br>12 month followup | Injection of bulking agent 1.0 ml Durasphere maximum 5 times with a minimum 7-day interval | Injection of bulking agent bovine collagen maximum 5 times with a minimum 7-day interval | Improvement of 1 or more continence grades                                                    | (76/176) [79/188] | 1.03 (0.81; 1.30) | 0.01 (-0.09; 0.11)  | No Intention to treat. Double blind. Randomization and allocation concealment not reported. Baseline data not reported. Sample size not justified.                                                   |

|                                                                                                       |                                                                                                                                      |                                                                                             |                                                                                               |                                          |                                                                 |                                                           |                                                                                                                                                                                                                              |
|-------------------------------------------------------------------------------------------------------|--------------------------------------------------------------------------------------------------------------------------------------|---------------------------------------------------------------------------------------------|-----------------------------------------------------------------------------------------------|------------------------------------------|-----------------------------------------------------------------|-----------------------------------------------------------|------------------------------------------------------------------------------------------------------------------------------------------------------------------------------------------------------------------------------|
| Schulz, 2004(82)<br>N = 40,<br>urodynamic stress or mixed UI<br>12 month followup                     | Periurethral route of injection of bulking agent-dextran copolymer                                                                   | Transurethral route of injection of bulking agent-dextran copolymer                         | Improved continence                                                                           | (6/20)<br>[7/20]                         | 0.86<br>(0.35; 2.10)                                            | -0.05<br>(-0.34; 0.24)                                    | Intention to treat. Open label. Computer generated block randomization scheme. Allocation concealment not reported. Baseline data confirmed adequacy of randomization. Sample size not justified.                            |
| Lee, 2001(163)<br>N = 68<br>12 month followup                                                         | Periurethral injections of autologous fat from the anterior abdominal wall or buttock                                                | Placebo (saline)                                                                            | Cured or improved                                                                             | (6/35)<br>[6/33]                         | 0.94<br>(0.34; 2.63)                                            | -0.01<br>(-0.19; 0.17)                                    | No Intention to treat. Double blind. Computerized randomization with random number tables. Allocation concealment not reported. Baseline data confirmed adequacy of randomization. Sample size justified.                    |
| Strasser, 2007(115)<br>N = 63,<br>intrinsic sphincter insufficiency or stress UI<br>12 month followup | Transurethral ultrasonography-guided injections of autologous myoblasts and fibroblasts; regular training and electrical stimulation | Conventional endoscopic injections of collagen; regular training and electrical stimulation | Substantial improvement in urinary continence<br><br>Slight improvement in urinary continence | (3/42)<br>[1/21]<br><br>(1/42)<br>[6/21] | 1.50<br>(0.17; 13.56)<br><br><b>0.08</b><br><b>(0.01; 0.65)</b> | 0.02<br><br>-0.10;<br>0.14)<br><br>-0.26<br>(-0.46; 0.06) | Intention to treat. Single blind. Computer-generated randomization list with permuted blocks and ratio of 2:1. Allocation concealment unclear. Baseline data confirmed adequacy of randomization. Sample size not justified. |
| Lightner, 2001(162)<br>N = 355,<br>intrinsic sphincter deficiency and stress UI<br>12 month followup  | Injection of bulking agent Durasphere max                                                                                            | Injection of bulking agent bovine collagen                                                  | Incidence of urgency                                                                          | (43/176)<br>[22/188]                     | <b>2.09</b><br><b>(1.30; 3.34)</b>                              | 0.13<br>(0.05; 0.21)                                      | No Intention to treat. Double blind. Randomization and allocation concealment not reported. Baseline data not reported. Sample size not justified.                                                                           |

|                                                                                                                   |                                                                                                            |                                                                         |                       |                   |                                              |                             |                                                                                                                                                                                                                                 |
|-------------------------------------------------------------------------------------------------------------------|------------------------------------------------------------------------------------------------------------|-------------------------------------------------------------------------|-----------------------|-------------------|----------------------------------------------|-----------------------------|---------------------------------------------------------------------------------------------------------------------------------------------------------------------------------------------------------------------------------|
| Strasser, 2007(115)<br>N = 63,<br>intrinsic<br>sphincter<br>insufficiency<br>or stress UI<br>12 month<br>followup | Transurethral<br>ultrasonograph<br>y-guided<br>injections of<br>autologous<br>myoblasts and<br>fibroblasts | Conventional<br>endoscopic<br>injections of<br>collagen                 | UI                    | (4/42)<br>[19/21] | <b>0.11</b><br><b>(0.04;</b><br><b>0.27)</b> | -0.81<br>(-0.96; -<br>0.66) | Intention to treat. Single blind. Computer-generated randomization list with permuted blocks and ratio of 2:1. Allocation concealment unclear. Baseline data confirmed adequacy of randomization. Sample size not justified.    |
| Corcos, 2005(67)<br>N = 133, stress<br>UI<br>13 month<br>followup                                                 | Intraurethral<br>collagen sub<br>mucosal<br>injection                                                      | Surgery (needle<br>bladder neck<br>suspension,<br>Burch, and<br>slings) | Complete<br>retention | (1/66)<br>[9/67]  | <b>0.1</b><br><b>(0.0;</b><br><b>0.9)</b>    | -0.12<br>(-0.21; -<br>0.03) | Intention to treat. Centralized randomization stratified by center with randomly distributed blocks 4 and 6 in size. Allocation concealment adequate. Baseline data confirmed adequacy of randomization. Sample size justified. |

\*Bold- significant differences at 95% confidence level. QOL = quality of life; UI = urinary incontinence.
