# Supplementary material
Source: HighWire-hosted journal article supplement (https://www.annals.org/content/suppl/2008/02/12/0000605-200803180-00211)
Supplement: Kane_AT06_148-6-458-DC1-6.pdf [file Kane_AT06_148-6-458-DC1-6.pdf]

Appendix Table 6. The Effects of Medical Devices on Female Urinary Incontinence: Results from Randomized Controlled Clinical Trials\*

| Author Sample Followup                                                 | Active Treatment                                                              | Control Treatment                                               | Outcome                                                                                                                                      | (Events /Active Treatment ) [Events/Control Treatment ] | Relative Risk (95% CI)                 | Risk Difference (95%CI)                      | Quality Issues                                                                                                                                                                                                                                                   |
|------------------------------------------------------------------------|-------------------------------------------------------------------------------|-----------------------------------------------------------------|----------------------------------------------------------------------------------------------------------------------------------------------|---------------------------------------------------------|----------------------------------------|----------------------------------------------|------------------------------------------------------------------------------------------------------------------------------------------------------------------------------------------------------------------------------------------------------------------|
| Robinson, 2003(117)<br>N = 24, mixed or stress 4 month followup        | Urethral device (NEAT) –sterile urethral insert with disposable applicator    | Reliance Insert sterile balloon device                          | Negative pad test                                                                                                                            | (9/13) [7/11]                                           | 1.09 (0.61; 1.93)                      | 0.06 (-0.32; 0.44)                           | No Intention to treat. Single blind. Randomization and allocation concealment not reported. Baseline data confirmed adequacy of randomization. Sample size not justified.                                                                                        |
| Nygaard, 1995(81)<br>N = 20, urodynami c stress UI No followup         | 40 minute standardized aerobics sessions wearing a Hodge pessary with support | 40 minute standardized aerobics sessions wearing a super tampon | Continent during exercise                                                                                                                    | (7/20) [12/20]                                          | 0.6 (0.3; 1.2)                         | -0.25 (-0.55; 0.05)                          | No intention to treat. Open label. Block randomization. Allocation concealment not reported. Baseline data not reported. Sample size not justified.                                                                                                              |
| Thyssen, 2001(69)<br>N = 94, predominant stress UI 1.25 month followup | Conveen Continenace disposable Intravaginal device                            | Contrelle continence tampon                                     | Self Reported Continenace                                                                                                                    | (34/94) [45/94]                                         | 0.76 (0.54; 1.06)                      | -0.12 (-0.26; 0.02)                          | No Intention to treat. Open label. Block randomization. Allocation concealment not reported. Baseline data not reported. Sample size not justified.                                                                                                              |
| Bo,1999(80)<br>N = 122, urodynami c stress UI 6 month followup         | Vaginal cones of 20, 40, and 70g for 20 minutes/day                           | Untreated control group offered use of a continence guard       | Objective cure as <2g leakage on pad test with standardized bladder volume<br>Subjective cure as (number of women stating that condition was | (4/29) [2/32]<br><br>(2/29) [1/32]                      | 2.2 (0.4; 11.2)<br><br>2.2 (0.2; 23.1) | 0.08 (-0.08; 0.23)<br><br>0.04 (-0.07; 0.15) | Intention to treat. Single blind. Computer generated random numbers stratified by baseline leakage. Allocation concealment unclear. Baseline data confirmed adequacy of randomization. Baseline data confirmed adequacy of randomization. Sample size justified. |

|                                                                                       |                                                                                                                                                                                                                                                   |                                                                                                                                                                                                                                               |                                                                   |                    |                      |                          |                                                                                                                                                                                       |
|---------------------------------------------------------------------------------------|---------------------------------------------------------------------------------------------------------------------------------------------------------------------------------------------------------------------------------------------------|-----------------------------------------------------------------------------------------------------------------------------------------------------------------------------------------------------------------------------------------------|-------------------------------------------------------------------|--------------------|----------------------|--------------------------|---------------------------------------------------------------------------------------------------------------------------------------------------------------------------------------|
|                                                                                       |                                                                                                                                                                                                                                                   |                                                                                                                                                                                                                                               | “unproblematic”<br>after treatment)                               |                    |                      |                          |                                                                                                                                                                                       |
| Seo, 2004(119)<br>N = 120,<br>any UI<br>1.5 months<br>followup                        | Pelvic floor<br>exercise (5 second<br>contraction and 10<br>second relaxation,<br>3-5 times for >5<br>minutes/day) and<br>functional<br>electrical<br>stimulation<br>biofeedback<br>(35Hz-50Hz for<br>24 seconds); 2<br>training<br>sessions/week | Vaginal cone<br>,150g<br>dumbbell-<br>shaped made<br>of fine<br>ceramic<br>material                                                                                                                                                           | Self reported<br>improvement in<br>urinary<br>incontinence        | (55/60)<br>[53/60] | 1.0<br>(0.9;<br>1.2) | 0.03<br>(-0.07;<br>0.14) | Intention to treat not stated. Open label.<br>Randomization and allocation<br>concealment not reported. Baseline data<br>not reported. Sample size not justified.                     |
| Robinson,<br>2003(117)<br>N = 24<br>with mixed<br>or stress 4<br>month<br>followup    | Urethral device<br>(NEAT) sterile<br>urethral insert<br>with disposable<br>applicator<br>packaged with<br>device                                                                                                                                  | Reliance<br>insert sterile<br>balloon type<br>device                                                                                                                                                                                          | Success as a<br>50% or greater<br>reduction in<br>urine loss      | (9/13)<br>[6/11]   | 1.3<br>(0.7;<br>2.4) | 0.15<br>(-0.24;<br>0.53) | No Intention to treat. Single blind.<br>Randomization and allocation<br>concealment not reported. Baseline data<br>confirmed adequacy of randomization.<br>Sample size not justified. |
| Thyssen,<br>2001(69)<br>N = 94,<br>predominant<br>stress UI<br>1.25 month<br>followup | Conveen<br>continence<br>disposable<br>intravaginal<br>device guard,<br>CCG made of<br>hydrophilic<br>polyurethane<br>requires soaking<br>in water before<br>being placed on a<br>handle like<br>applicator for<br>insertion                      | Contrelle<br>Continence<br>Tampon, CCT,<br>coloplastic<br>made of<br>hydrophobic<br>polyurethane<br>and supplied<br>ready-<br>assembled<br>within an<br>applicator,<br>allowing<br>insertion<br>directly into<br>the vagina with<br>no manual | Self reported<br>Improvement in<br>stress urinary<br>incontinence | (38/94)<br>[34/94] | 1.1<br>(0.8;<br>1.6) | 0.04<br>(-0.10;<br>0.18) | No Intention to treat. Open label. Block<br>randomization. Allocation concealment<br>not reported. Baseline data not reported.<br>Sample size not justified.                          |

|                                                                           |                                                                  |                                 |                                               |                  |                          |                          |                                                                                                                                                                                                                                                                                    |
|---------------------------------------------------------------------------|------------------------------------------------------------------|---------------------------------|-----------------------------------------------|------------------|--------------------------|--------------------------|------------------------------------------------------------------------------------------------------------------------------------------------------------------------------------------------------------------------------------------------------------------------------------|
|                                                                           |                                                                  | <b>contact</b>                  |                                               |                  |                          |                          |                                                                                                                                                                                                                                                                                    |
| Bo,1999(80)<br>N = 122,<br>urodynamic<br>stress UI<br>6 month<br>followup | The vaginal<br>cones of 20, 40,<br>and 70g for 20<br>minutes/day | Use of a<br>continence<br>guard | Urinary<br>continence and<br>almost continent | (5/29)<br>[1/32] | 5.52<br>(0.68;<br>44.49) | 0.14<br>(-0.01;<br>0.29) | Intention to treat. Single blind. Computer<br>generated random numbers stratified by<br>baseline leakage. Allocation concealment<br>unclear. Baseline data confirmed<br>adequacy of randomization. Baseline data<br>confirmed adequacy of randomization.<br>Sample size justified. |

\*Bold- significant differences at 95% confidence level. CCT = Contrelle Continence Tampon; CCG = Conveen Continence Guard; NEAT = new urethral device; UI = urinary incontinence.
