# Supplementary material
Source: HighWire-hosted journal article supplement (https://www.annals.org/content/suppl/2008/02/12/0000605-200803180-00211)
Supplement: Kane_AT07_148-6-458-DC1-7.pdf [file Kane_AT07_148-6-458-DC1-7.pdf]

Appendix Table 7. The Effects of Hormone Therapy on Female Urinary Incontinence: Results from Randomized Controlled Clinical Trials\*

| Author Sample Followup                                                                                 | Active Treatment                                                                                                        | Control Treatment                                                                             | Outcome                  | (Events/ (Active Treatment) ) [Events/Control Treatment] | Relative Risk (95% CI)   | Risk Difference (95%CI) | Quality Issues                                                                                                                                                                                     |
|--------------------------------------------------------------------------------------------------------|-------------------------------------------------------------------------------------------------------------------------|-----------------------------------------------------------------------------------------------|--------------------------|----------------------------------------------------------|--------------------------|-------------------------|----------------------------------------------------------------------------------------------------------------------------------------------------------------------------------------------------|
| Akhila, 2006(126) N= 116, post-menopausal symptoms 12 month followup                                   | Estradiol gel percutaneous 1.25 g/day                                                                                   | Transdermal patch with 50 mg/day estradiol                                                    | Self Reported Continence | (26/29) [40/40]                                          | 0.89 (0.78; 1.02)        | -0.10 (-0.22; 0.02)     | No intention to treat. Open label. Allocation concealment unclear. Baseline data confirmed the adequacy of randomization. Sample size not justified.                                               |
| Chompoota weep 1998, (164) N = 20, urogenital symptoms related to estrogen deficiency 2 month followup | Combined contraceptive Intravaginal 1 pill/ week at bedtime with 250 mg levonorgestrel +30 micrograms ethinyl estradiol | Intravaginal conjugated estrogen cream (1 g = 0.625mg conjugated equine estrogens) at bedtime | Self Reported Continence | (9/10) [9/10]                                            |                          | 0.00 (-0.32; 0.32)      | Intention to treat not stated. Open label. Randomization procedure not reported. Allocation concealment unclear. Baseline data confirmed the adequacy of randomization. Sample size not justified. |
| Akhila, 2006(126) N = 116 post-menopausal symptoms 12 month followup                                   | Conjugated equine estrogen 0.625 orally/day                                                                             | Transdermal patch with 50 mg/day estradiol                                                    | Self Reported Continence | (19/47) [40/40]                                          | <b>0.41 (0.29; 0.58)</b> | -0.60 (-0.74; -0.45)    | No intention to treat. Open label. Allocation concealment unclear. Baseline data confirmed the adequacy of randomization. Sample size not justified.                                               |

|                                                                    |                                                                                                       |                                                                          |                             |                     |                             |                     |                                                                                                                                                                                                                                                      |
|--------------------------------------------------------------------|-------------------------------------------------------------------------------------------------------|--------------------------------------------------------------------------|-----------------------------|---------------------|-----------------------------|---------------------|------------------------------------------------------------------------------------------------------------------------------------------------------------------------------------------------------------------------------------------------------|
| Waetjen, 2004(165)<br>N = 963<br>36 month followup                 | Raloxifene 60mg /day or Raloxifene 120mg/day                                                          | Placebo                                                                  | Self Reported Continence    | (243/638) [125/325] | 0.99 (0.84; 1.17)           | 0.00 (-0.07; 0.06)  | No intention to treat Open label. Randomization and allocation concealment not reported. Baseline data confirmed adequacy of randomization. Sample size justified.                                                                                   |
| Rufford, 2003(124)<br>N = 40, urgency 6 month followup             | 25mg 17 beta-estradiol implant subcutaneous tissue                                                    | Placebo implant                                                          | Self Reported Continence    | (7/20) [6/20]       | 1.17 (0.48; 2.86)           | 0.05 (-0.24; 0.34)  | No intention to treat. Double blind. Allocation concealment adequate. Baseline data confirmed the adequacy of randomization. Sample size justified.                                                                                                  |
| Mikkelsen, 1995(127)<br>N = 47<br>36 month followup                | Vagifem (25 micrograms oestradiol) administered as vaginal pessaries daily 3 weeks prior to surgery   | Placebo administered as vaginal pessaries daily 3 weeks prior to surgery | Self Reported Continence    | (5/21) [6/19]       | 0.75 (0.27; 2.07)           | -0.08 (-0.35; 0.20) | No intention to treat. Double blind. Allocation concealment unclear. Baseline data not presented. Sample size not justified.                                                                                                                         |
| Kok, 1999(141)<br>N = 102<br>6 month followup                      | 2mg 17 b-oestradiol in combination with either 2.5, 5, 10, or 15 mg dydrogesterone, orally once a day | Changes from baseline. No placebo group                                  | Self Reported Continence    | (23/102) [0/102]    | <b>47.00 (2.89; 763.52)</b> | 0.23 (0.14; 0.31)   | Intention to treat not stated. Double-blind. Randomization with permuted blocks Allocation concealment unclear. Nonparametric tests for randomization bias. Baseline data confirmed the adequacy of randomization. No justification for sample size. |
| Holtedahl, 1998(116)<br>N = 90, positive pad test 6 month followup | Local estrogen in vagitories or jelly plus physiotherapy and electro stimulation                      | No treatment                                                             | Self Reported Continence    | (8/36) [0/44]       | <b>20.68 (1.23; 346.46)</b> | 0.22 (0.08; 0.36)   | No intention to treat. Randomization by phone from the university department. Allocation concealment unclear. Open label. Baseline data confirmed adequacy of randomization. Sample size justified.                                                  |
| Rufford, 2003(124)<br>N = 40, urgency 6 month followup             | 25mg 17 beta-estradiol implant subcutaneous tissue                                                    | Placebo implant                                                          | Self Reported Continence    | (4/20) [3/20]       | 1.33 (0.34; 5.21)           | 0.05 (-0.18; 0.28)  | No intention to treat. Double blind. Allocation concealment adequate. Baseline data confirmed the adequacy of randomization. Sample size justified.                                                                                                  |
|                                                                    |                                                                                                       |                                                                          | Stress Incontinence % Cured | (4/20) [3/20]       | 1.3 (0.3; 5.2)              | 0.05 (-0.18; 0.28)  |                                                                                                                                                                                                                                                      |

|                                                                            |                                                                                                       |                                         | Urgency, % Of Cured             | (3/20<br>[2/20]        | 1.5 (0.3;<br>8.0)                                  | 0.05<br>(-0.15;<br>0.25)  |                                                                                                                                                                                                                                                                                               |
|----------------------------------------------------------------------------|-------------------------------------------------------------------------------------------------------|-----------------------------------------|---------------------------------|------------------------|----------------------------------------------------|---------------------------|-----------------------------------------------------------------------------------------------------------------------------------------------------------------------------------------------------------------------------------------------------------------------------------------------|
| Grady, 2001(166)<br>N = 1,525<br>48 month followup                         | 0.625mg of conjugated estrogens plus 2.5mg of medroxyprogesterone acetate in one tablet daily         | Placebo                                 | Self Reported Continence        | (109/768)<br>[134/757] | 0.80<br>(0.64;<br>1.01)                            | -0.04<br>(-0.07;<br>0.00) | No Intention to treat. Double blind. Randomization using randomly permuted blocks of size 4 stratified by site. Allocation concealment adequate (reported previously). Sample size justified                                                                                                  |
| Jackson, 1999(167)<br>N = 67,<br>urodynamic stress UI<br>6 month followup  | Change from baseline after oestradiol valerate 2mg daily                                              | Change from baseline after placebo      | Self Reported Continence        | (5/33)<br>[5/34]       | 1.03<br>(0.33;<br>3.23)                            | 0.00<br>(-0.17;<br>0.18)  | No Intention to treat. Double-blind Randomization (computer generated simple random sampling) by hospital pharmacy. Allocation concealment unclear Sample size justified for the primary outcome-% of total collagen. No baseline comparison reported                                         |
| Dessole, 2004 (168)<br>N = 88,<br>positive stress test<br>6 month followup | Intravaginal estriol ovules: 1 ovule (1mg ) once daily for 2 weeks and then 2 ovules once weekly      | Placebo vaginal suppositories           | Continence, improved continence | (30/44)<br>[7/44]      | <b>4.29</b><br><b>(2.11;</b><br><b>8.71)</b>       | 0.52<br>(0.35;<br>0.70)   | Intention to treat. Double-blind. Randomization was obtained using sets of sequenced, sealed, opaque envelopes, each containing the bottle number to be given to each participant. Allocation concealment adequate. Baseline data confirmed adequacy of randomization. Sample size justified. |
| Kok, 1999(141)<br>N = 102<br>6 month followup                              | 2mg 17 b-oestradiol in combination with either 2.5, 5, 10, or 15 mg dydrogesterone, orally once a day | Changes from baseline. No placebo group | Disappearance of nocturia       | (67/102)<br>[0/102]    | <b>135.00</b><br><b>(8.47;</b><br><b>2,151.44)</b> | 0.66<br>(0.56;<br>0.75)   | Intention to treat not stated. Double-blind. Randomization with permuted blocks Allocation concealment unclear. Nonparametric tests for randomization bias. Baseline data confirmed the adequacy of randomization. No justification for sample size.                                          |
| Ahlstrom, 1990(169)<br>N = 29,<br>stress UI<br>1.5 month followup          | Estriol 4mg once daily and phenylpropanolamine 50 mg twice daily                                      | Estriol 4mg once daily                  | Improved continence             | (13/29)<br>[11/29]     | 1.18<br>(0.64;<br>2.19)                            | 0.07<br>(-0.18;<br>0.32)  | No intention to treat. Double blind. Allocation concealment unclear. Baseline data not provided but reported as balanced. Sample size not justified.                                                                                                                                          |

|                                                                          |                                                                                  |                                                                 |                                                                                            |                      |                                               |                             |                                                                                                                                                                                                                                                                                                                          |
|--------------------------------------------------------------------------|----------------------------------------------------------------------------------|-----------------------------------------------------------------|--------------------------------------------------------------------------------------------|----------------------|-----------------------------------------------|-----------------------------|--------------------------------------------------------------------------------------------------------------------------------------------------------------------------------------------------------------------------------------------------------------------------------------------------------------------------|
| Holtedahl, 1998(116)<br>N = 90,<br>positive pad test<br>6 month followup | Local estrogen in vagitories or jelly plus physiotherapy and electro stimulation | No treatment                                                    | Reduction in frequency amount, or wet episodes                                             | (14/36)<br>[4/44]    | <b>4.28</b><br><b>(1.54;</b><br><b>11.87)</b> | 0.30<br>(0.12;<br>0.48)     | No intention to treat. Randomization by phone from the university department. Allocation concealment unclear. Open label. Baseline data confirmed adequacy of randomization. Sample size justified.                                                                                                                      |
| Waetjen, 2004(165)<br>N = 963<br>36 month followup                       | Raloxifene 60mg/day or Raloxifene 120mg/day                                      | Placebo                                                         | Incontinent episodes/day at 3 years<br>Improved urinary incontinence at 3 years            | (57/638)<br>[22/325] | 1.3 (0.8;<br>2.1)                             | -0.11<br>(-0.20; -<br>0.02) | No intention to treat Open label. Randomization and allocation concealment not reported. Baseline data confirmed adequacy of randomization. Sample size justified.                                                                                                                                                       |
| Waetjen, 2005(125)<br>N = 417<br>36 month followup                       | 14mg/day of transdermal E2 for 4 months                                          | Placebo for 4 months                                            | Improved incontinence: the number of incontinence episodes per week decreased by 2 or more | (52/208)<br>[74/209] | 0.7<br>(0.5;<br>1.0)                          | -0.10<br>(-0.19; -<br>0.02) | Intention to treat. Double-blind. Computer-generated randomization stratified by clinical center in blocks of 4. Treatment numbers were printed on labels adhered to identical-looking study medications. Allocation concealment adequate. Baseline data confirmed the adequacy of randomization. Sample size justified. |
| Vardy, 2003(139)<br>N = 58<br>5 month followup                           | Conjugated equine estrogen 0.625mg                                               | Placebo                                                         | Pelvic organ prolapse quantization, % of subjects with improved scores                     | (4/15)<br>[0/13]     | 7.9<br>(0.5;<br>133.8)                        | 0.27<br>(0.03;<br>0.51)     | Intention to treat not stated. Double-blind. Allocation concealment unclear. Subjects had Incontinence at baseline (32.7%) with unknown distribution in the groups. No justification for sample size.                                                                                                                    |
| Long, 2006(170)<br>N = 73<br>3 month followup                            | Oral 0.625mg of conjugated equine estrogen per tablet                            | Topical 0.63mg conjugated equine estrogen per 1 g vaginal cream | Improved scores in Bristol Female Lower Urinary Tract Symptoms Questionnaires              | (8/37)<br>[9/36]     |                                               | -0.03<br>(-0.23;<br>0.16)   | No Intention to treat. Two investigators were blind to each other's results. Allocation concealment unclear. No justification for the sample size. No comparison provided between groups, before/after treatments only.                                                                                                  |

|                                                                                                                                 |                                                                                              |                  |                                                                                                   |                        |                                    |                        |                                                                                                                                                                                                                                                                                                                          |
|---------------------------------------------------------------------------------------------------------------------------------|----------------------------------------------------------------------------------------------|------------------|---------------------------------------------------------------------------------------------------|------------------------|------------------------------------|------------------------|--------------------------------------------------------------------------------------------------------------------------------------------------------------------------------------------------------------------------------------------------------------------------------------------------------------------------|
| Vardy, 2003(139)<br>N = 58<br>5 month followup                                                                                  | Conjugated equine estrogen 0.625mg                                                           | Placebo          | Improvement of urinary symptoms; Average change in angle of deflection                            | (3/15)<br>[0/13]       | 6.1<br>(0.3; 108.6)                | 0.20<br>(-0.02; 0.42)  | Intention to treat not stated. Double-blind. Allocation concealment unclear. Subjects had Incontinence at baseline (32.7%) with unknown distribution in the groups. No justification for sample size.                                                                                                                    |
| Waetjen, 2005(125)<br>N = 417<br>4 month followup<br>24 month followup                                                          | 14mg of transdermal E2 per day                                                               | Placebo 4 months | Decrease by >2 incontinence episodes per week                                                     | (30/208)<br>[57/209]   | <b>0.53</b><br><b>(0.36; 0.79)</b> | -0.13<br>(-0.21; 0.05) | Intention to treat. Double-blind. Computer-generated randomization stratified by clinical center in blocks of 4. Treatment numbers were printed on labels adhered to identical-looking study medications. Allocation concealment adequate. Baseline data confirmed the adequacy of randomization. Sample size justified. |
|                                                                                                                                 | 14mg of transdermal E2 per day for 2 years                                                   | Placebo 2 years  | Decrease by >2 incontinence episodes per week                                                     | (27/208)<br>[35/209]   | 0.78<br>(0.49; 1.23)               | -0.04<br>(-0.11; 0.03) |                                                                                                                                                                                                                                                                                                                          |
|                                                                                                                                 |                                                                                              |                  | Improved stress incontinence: the number of incontinence episodes per week decreased by 2 or more | (37/208)<br>[61/209]   | <b>0.6</b><br><b>(0.4; 0.9)</b>    | 0.00<br>(-0.07; 0.06)  |                                                                                                                                                                                                                                                                                                                          |
| Vardy, 2003(139)<br>N = 58<br>5 month followup                                                                                  | Raloxifene 60mg                                                                              | Placebo          | Improvement of urinary symptoms and angle of deflection                                           | (1/15)<br>[0/13]       | 2.63<br>(0.12; 59.40)              | 0.07<br>(-0.11; 0.24)  | Intention to treat not stated. Double-blind. Allocation concealment unclear. Subjects had Incontinence at baseline (32.7%) with unknown distribution in the groups. No justification for sample size.                                                                                                                    |
| Grady, 2001(166)<br>N = 1,525<br>100% female<br>4 month followup<br>12 month followup<br>24 month followup<br>36 month followup | 0.63mg of conjugated estrogens plus 2.5mg of medroxyprogesterone acetate in one tablet daily | Placebo          | Decrease by at least 2 episodes per week                                                          | (215/768)<br>[241/757] | 0.88<br>(0.75; 1.03)               | -0.04<br>(-0.08; 0.01) | No Intention to treat. Double blind. Randomization using randomly permuted blocks of size 4 stratified by site. Allocation concealment adequate (reported previously). Sample size justified                                                                                                                             |
|                                                                                                                                 |                                                                                              |                  |                                                                                                   | (214/768)<br>[248/757] | <b>0.85</b><br><b>(0.73; 0.99)</b> | -0.05<br>(-0.10; 0.00) |                                                                                                                                                                                                                                                                                                                          |
|                                                                                                                                 |                                                                                              |                  |                                                                                                   | (191/768)<br>[236/757] | <b>0.80</b><br><b>(0.68; 0.94)</b> | -0.06<br>(-0.11; 0.02) |                                                                                                                                                                                                                                                                                                                          |
|                                                                                                                                 |                                                                                              |                  |                                                                                                   | (181/768)<br>[222/757] | <b>0.80</b><br><b>(0.68; 0.95)</b> | -0.06<br>(-0.10; 0.01) |                                                                                                                                                                                                                                                                                                                          |
|                                                                                                                                 |                                                                                              |                  |                                                                                                   |                        |                                    |                        |                                                                                                                                                                                                                                                                                                                          |

|                                                                           |                                                                                  |         |                                                      |                        |                                              |                             |                                                                                                                                                                                                                                                                      |
|---------------------------------------------------------------------------|----------------------------------------------------------------------------------|---------|------------------------------------------------------|------------------------|----------------------------------------------|-----------------------------|----------------------------------------------------------------------------------------------------------------------------------------------------------------------------------------------------------------------------------------------------------------------|
| 48 month followup                                                         |                                                                                  |         |                                                      | (162/768)<br>[203/757] | <b>0.79</b><br><b>(0.66;</b><br><b>0.94)</b> | -0.06<br>(-0.10; -<br>0.01) |                                                                                                                                                                                                                                                                      |
|                                                                           |                                                                                  |         | Improved or markedly improved continence             | (158/768)<br>[194/757] | <b>0.80</b><br><b>(0.67;</b><br><b>0.97)</b> | -0.05<br>(-0.09; -<br>0.01) |                                                                                                                                                                                                                                                                      |
| Jackson, 1999(167)<br>N = 67,<br>urodynamic stress UI<br>6 month followup | Post oestradiol valerate 2mg daily                                               | Placebo | Urge UI                                              | (33/33)<br>[33/34]     | 1.03<br>(0.95;<br>1.12)                      | 0.03<br>(-0.05;<br>0.11)    | No Intention to treat.<br>Double-blind<br>Randomization (computer generated simple random sampling) by hospital pharmacy.<br>Allocation concealment unclear<br>Sample size justified for the primary outcome-% of total collagen.<br>No baseline comparison reported |
|                                                                           |                                                                                  |         | Stress UI                                            | (33/33)<br>[34/34]     |                                              | 0.00<br>(-0.06;<br>0.06)    |                                                                                                                                                                                                                                                                      |
|                                                                           |                                                                                  |         | Frequency of incontinence episodes (more than never) | (33/33)<br>[34/34]     |                                              | 0.00<br>(-0.06;<br>0.06)    |                                                                                                                                                                                                                                                                      |
|                                                                           |                                                                                  |         | Quantity of lost urine (more than none)              | (33/33)<br>[34/34]     |                                              | 0.00<br>(-0.06;<br>0.06)    |                                                                                                                                                                                                                                                                      |
|                                                                           |                                                                                  |         | Urinary urgency                                      | (31/33)<br>[33/34]     | 0.97<br>(0.87;<br>1.07)                      | -0.03<br>(-0.13;<br>0.07)   |                                                                                                                                                                                                                                                                      |
|                                                                           |                                                                                  |         | Unexplained UI                                       | (24/33)<br>[16/34]     | <b>1.55</b><br><b>(1.02;</b><br><b>2.34)</b> | 0.26<br>(0.03;<br>0.48)     |                                                                                                                                                                                                                                                                      |
|                                                                           |                                                                                  |         | Wearing protection                                   | (24/33)<br>[24/34]     | 1.03<br>(0.76;<br>1.39)                      | 0.02<br>(-0.19;<br>0.24)    |                                                                                                                                                                                                                                                                      |
| Steinauer, 2005(122)<br>N = 184, any UI<br>50.4 month followup            | Oral daily conjugated estrogen (0.63mg) and medroxy progesterone acetate (2.5mg) | Placebo | Incident UI                                          | (382/597)<br>[302/611] | <b>1.29</b><br><b>(1.17;</b><br><b>1.43)</b> | 0.15<br>(0.09;<br>0.20)     | Intention to treat. Double-blind.<br>Randomization in each of 20 clinical centers using randomly permuted blocks of 4. Groups of continent women were comparable at baseline. No justification for sample size<br>Incontinence - secondary outcome.                  |

|                                                                                 |                                                                                                    |         |                                                                                     |                                              |                                                                         |                                                           |                                                                                                                                                                                                                                                                               |
|---------------------------------------------------------------------------------|----------------------------------------------------------------------------------------------------|---------|-------------------------------------------------------------------------------------|----------------------------------------------|-------------------------------------------------------------------------|-----------------------------------------------------------|-------------------------------------------------------------------------------------------------------------------------------------------------------------------------------------------------------------------------------------------------------------------------------|
| Jackson, 1999(167)<br>N = 67,<br>urodynamic<br>stress UI<br>6 month<br>followup | Oestradiol<br>valerate 2mg<br>daily                                                                | Placebo | Inability to stop<br>midstream                                                      | (20/33)<br>[24/34]                           | 0.86<br>(0.60;<br>1.22)                                                 | -0.10<br>(-0.33;<br>0.13)                                 | No Intention to treat.<br>Double-blind<br>Randomization (computer generated<br>simple random sampling) by hospital<br>pharmacy.<br>Allocation concealment unclear<br>Sample size justified for the primary<br>outcome-% of total collagen.<br>No baseline comparison reported |
| Steinauer, 2005(122)<br>N = 184<br>50.4 month<br>followup                       | Oral daily<br>conjugated<br>estrogen<br>(0.63mg) and<br>medroxy<br>progesterone<br>acetate (2.5mg) | Placebo | Incident UI in<br>women younger<br>than 60 years<br>Incident of<br>weekly stress UI | (57/96)<br>[42/88]<br>(322/597)<br>[232/611] | 1.24<br>(0.95;<br>1.64)<br><b>1.42</b><br><b>(1.25;</b><br><b>1.61)</b> | 0.12<br>(-0.03;<br>0.26)<br>0.16<br>(0.10;<br>0.22)       | Intention to treat. Double-blind.<br>Randomization in each of 20 clinical<br>centers using randomly permuted blocks<br>of 4. Groups of continent women were<br>comparable at baseline. No justification<br>for sample size<br>Incontinence - secondary outcome.               |
| Jackson, 1999(167)<br>N = 67,<br>urodynamic<br>stress UI<br>6 month<br>followup | Oestradiol<br>valerate 2mg<br>daily                                                                | Placebo | Changing outer<br>clothing<br><br>Intermittent<br>stream                            | (17/33)<br>[17/34]<br><br>(17/33)<br>[20/34] | 1.03<br>(0.64;<br>1.65)<br><br>0.85<br>(0.55;<br>1.32)                  | 0.02<br>(-0.22;<br>0.25)<br><br>-0.09<br>(-0.32;<br>0.15) | No Intention to treat.<br>Double-blind<br>Randomization (computer generated<br>simple random sampling) by hospital<br>pharmacy.<br>Allocation concealment unclear<br>Sample size justified for the primary<br>outcome-% of total collagen.<br>No baseline comparison reported |
| Steinauer, 2005(122)<br>N = 1,208<br>50.4 month<br>followup                     | Oral daily<br>conjugated<br>estrogen<br>(0.63mg) and<br>medroxy<br>progesterone<br>acetate (2.5mg) | Placebo | Incident of<br>weekly urge UI                                                       | (287/597)<br>[220/611]                       | <b>1.34</b><br><b>(1.17;</b><br><b>1.53)</b>                            | 0.12<br>(0.07;<br>0.18)                                   | Intention to treat. Double-blind.<br>Randomization in each of 20 clinical<br>centers using randomly permuted blocks<br>of 4. Groups of continent women were<br>comparable at baseline. No justification<br>for sample size<br>Incontinence - secondary outcome.               |

|                                                                           |                                                                                                                |                                            |                          |                                                 |                                                                     |                                                    |                                                                                                                                                                                                                                                                                                                          |
|---------------------------------------------------------------------------|----------------------------------------------------------------------------------------------------------------|--------------------------------------------|--------------------------|-------------------------------------------------|---------------------------------------------------------------------|----------------------------------------------------|--------------------------------------------------------------------------------------------------------------------------------------------------------------------------------------------------------------------------------------------------------------------------------------------------------------------------|
| Waetjen, 2005(125)<br>N = 417<br>24 month followup                        | 14mg of transdermal E2 per day for 2 years                                                                     | Placebo 2 years                            | Incident UI              | (81/208)<br>[77/209]                            | 1.06<br>(0.83; 1.35)                                                | 0.02<br>(-0.07; 0.11)                              | Intention to treat. Double-blind. Computer-generated randomization stratified by clinical center in blocks of 4. Treatment numbers were printed on labels adhered to identical-looking study medications. Allocation concealment adequate. Baseline data confirmed the adequacy of randomization. Sample size justified. |
| Lose, 2000(171)<br>N = 251<br>6 month followup                            | Oestradiol-releasing ring, 7.5mg oestradiol                                                                    | Oestriol pessaries 0.5 mg every second day | Stress UI<br><br>Urge UI | (46/134)<br>[48/117]<br><br>(44/134)<br>[0/117] | 0.84<br>(0.61; 1.15)<br><br><b>77.79</b><br><b>(4.84; 1,249.40)</b> | -0.07<br>(-0.19; 0.05)<br><br>0.33<br>(0.25; 0.41) | Intention to treat. Open label. Central randomization. Allocation concealment unclear. Baseline data confirmed the adequacy of randomization. Sample size justified.                                                                                                                                                     |
| Dessole, 2004(168)<br>N = 88,<br>positive stress test<br>6 month followup | Intravaginal estriol ovules: 1 ovule (1mg ) once daily for 2 weeks and then 2 ovules once weekly for 6 months. | Placebo vaginal suppositories              | Stress UI                | (14/44)<br>[37/44]                              | <b>0.38</b><br><b>(0.24; 0.59)</b>                                  | -0.52<br>(-0.70; -0.35)                            | Intention to treat. Double-blind. Randomization was obtained using sets of sequenced, sealed, opaque envelopes, each containing the bottle number to be given to each participant. Allocation concealment adequate. Baseline data confirmed adequacy of randomization. Sample size justified.                            |
| Lose, 2000(171)<br>N = 251<br>6 month followup                            | Oestradiol-releasing ring, 7.5mg oestradiol                                                                    | Oestriol pessaries 0.5 mg every second day | Nocturia                 | (42/134)<br>[41/117]                            | 0.89<br>(0.63; 1.27)                                                | -0.04<br>(-0.15; 0.08)                             | Intention to treat. Open label. Central randomization. Allocation concealment unclear. Baseline data confirmed the adequacy of randomization. Sample size justified.                                                                                                                                                     |
| Jackson, 1999(167)<br>N = 67,<br>urodynamic stress UI<br>6 month followup | Oestradiol valerate 2mg/day                                                                                    | Placebo                                    | Abnormal stream          | (10/33)<br>[7/34]                               | 1.47<br>(0.64; 3.41)                                                | 0.10<br>(-0.11; 0.30)                              | No Intention to treat. Double-blind Randomization (computer generated simple random sampling) by hospital pharmacy. Allocation concealment unclear Sample size justified for the primary outcome-% of total collagen. No baseline comparison reported                                                                    |

|                                                          |                                                      |                                                                 |                            |                        |                          |                           |                                                                                                                                                                                                                                                                             |
|----------------------------------------------------------|------------------------------------------------------|-----------------------------------------------------------------|----------------------------|------------------------|--------------------------|---------------------------|-----------------------------------------------------------------------------------------------------------------------------------------------------------------------------------------------------------------------------------------------------------------------------|
| Long, 2006(170)<br>N = 73<br>3 months followup           | Oral 0.63mg of conjugated equine estrogen per tablet | Topical 0.63mg conjugated equine estrogen per 1 g vaginal cream | Nocturia                   | (10/37)<br>[3/36]      | 3.24<br>(0.97;<br>10.83) | 0.19<br>(0.02;<br>0.36)   | No Intention to treat. Two investigators were blind to each other's results. Allocation concealment unclear. No justification for the sample size. No comparison provided between groups, before/after treatments only.                                                     |
| Lose, 2000(171)<br>N = 251<br>6 month followup           | Oestradiol-releasing ring, 7.5mg oestradiol          | Oestriol pessaries 0.5mg every second day                       | Self reported urgency      | (36/134)<br>[39/117]   | 0.81<br>(0.55;<br>1.18)  | -0.06<br>(-0.18;<br>0.05) | Intention to treat. Open label. Central randomization. Allocation concealment unclear. Baseline data confirmed the adequacy of randomization. Sample size justified.                                                                                                        |
| Waetjen, 2004(165)<br>N = 963<br>36 month followup       | Raloxifene 60mg /day or raloxifene 120mg/day         | Placebo                                                         | Urge UI                    | (164/638)<br>[89/325]  | 0.94<br>(0.75;<br>1.17)  | -0.02<br>(-0.08;<br>0.04) | No intention to treat Open label. Randomization and allocation concealment not reported. Baseline data confirmed adequacy of randomization. Sample size justified.                                                                                                          |
| Vardy, 2003(139)<br>N = 58<br>5 month followup           | Conjugated equine estrogen 0.63mg;                   | Placebo                                                         | Any indicator of prolapse. | (3/15)<br>[2/13]       | 1.30<br>(0.26;<br>6.62)  | 0.05<br>(-0.24;<br>0.33)  | Intention to treat not stated. Double-blind. Allocation concealment unclear. Subjects had Incontinence at baseline (32.7%) with unknown distribution in the groups. No justification for sample size.                                                                       |
| Vestergaard, 2003(140)<br>N = 1,006<br>60 month followup | Sequential oral oestrogen and progestogen            | No HRT                                                          | UI with mild discomfort    | (100/502)<br>[101/504] | 0.99<br>(0.78;<br>1.27)  | 0.00<br>(-0.05;<br>0.05)  | Intention to treat. Open label. Group 1 and 2 were block-randomized in groups of ten by the envelope method. Baseline data providing difference between treatment regimens not analyzed. No justification for sample size. Outcomes reported in two groups: HRT vs. No HRT. |
| Waetjen, 2004(165)<br>N = 963<br>36 month followup       | Raloxifene 60mg/day or raloxifene 120mg/day          | Placebo                                                         | Mixed UI                   | (111/638)<br>[47/325]  | 1.20<br>(0.88;<br>1.65)  | 0.03<br>(-0.02;<br>0.08)  | No intention to treat Open label. Randomization and allocation concealment not reported. Baseline data confirmed adequacy of randomization. Sample size justified.                                                                                                          |

|                                                          |                                                         |                                                                 |                                                          |                          |                          |                        |                                                                                                                                                                                                                                                                             |
|----------------------------------------------------------|---------------------------------------------------------|-----------------------------------------------------------------|----------------------------------------------------------|--------------------------|--------------------------|------------------------|-----------------------------------------------------------------------------------------------------------------------------------------------------------------------------------------------------------------------------------------------------------------------------|
| Hendrix, 2005(121)<br>N = 3,073<br>12 month followup     | Estrogen alone: 0.625mg conjugated equine estrogen      | Placebo                                                         | Incident Stress Urinary Incontinence                     | (266/1526)<br>[131/1547] | <b>2.1 (1.7; 2.5)</b>    | 0.09<br>(0.07; 0.11)   | Intention to treat Double-blind. Central randomization at a 1:1 ratio. The study pill bottles had unique bar codes and computer-based selection to enable double-blinded dispensing. Incontinence - secondary outcome. Baseline data confirmed adequacy of randomization.   |
| Goldstein, 2002(172)<br>N = 2,924<br>36 month followup   | Levomeloxifene 0.5mg/day                                | Placebo                                                         | Self reported Urinary incontinence on both active groups | (338/978)<br>[37/970]    | <b>9.1 (6.5; 12.6)</b>   | 0.31<br>(0.28; 0.34)   | Intention to treat not stated. Double-blind. No justification for the sample size. Allocation concealment unclear. Only a subset of the data was ever validated; no summary statistics were calculated for demographic data. No justification for sample size.              |
| Long, 2006(170)<br>N = 73<br>3 month followup            | Oral 0.63mg of conjugated equine estrogen per tablet    | Topical 0.63mg conjugated equine estrogen per 1 g vaginal cream | Stress UI                                                | (6/37)<br>[13/36]        | 0.45<br>(0.19; 1.05)     | -0.20<br>(-0.40; 0.00) | No Intention to treat. Two investigators were blind to each other's results. Allocation concealment unclear. No justification for the sample size. No comparison provided between groups, before/after treatments only.                                                     |
| Hendrix, 2005(121)<br>N = 5,182<br>12 month followup     | 0.63mg of CEE plus 2.5mg of medroxyprogesterone acetate | Placebo                                                         | Incident Stress UI                                       | (429/2675)<br>[218/2507] | <b>1.84 (1.58; 2.15)</b> | 0.07<br>(0.06; 0.09)   | Intention to treat Double-blind. Central randomization at a 1:1 ratio. The study pill bottles had unique bar codes and computer-based selection to enable double-blinded dispensing. Incontinence - secondary outcome. Baseline data confirmed adequacy of randomization.   |
| Waetjen, 2004(165)<br>N = 963<br>36 month followup       | Raloxifene 60mg/day or raloxifene 120mg/day             | Placebo                                                         | Stress UI                                                | (99/638)<br>[55/325]     | 0.92<br>(0.68; 1.24)     | -0.01<br>(-0.06; 0.04) | No intention to treat Open label. Randomization and allocation concealment not reported. Baseline data confirmed adequacy of randomization. Sample size justified.                                                                                                          |
| Vestergaard, 2003(140)<br>N = 1,006<br>60 month followup | Sequential oral oestrogen and progestogen               | No HRT                                                          | Frequent voiding: mild discomfort                        | (70/502)<br>[81/504]     | 0.87<br>(0.65; 1.17)     | -0.02<br>(-0.07; 0.02) | Intention to treat. Open label. Group 1 and 2 were block-randomized in groups of ten by the envelope method. Baseline data providing difference between treatment regimens not analyzed. No justification for sample size. Outcomes reported in two groups: HRT vs. No HRT. |

|                                                                           |                                                      |                                                                |                                                           |                          |                          |                         |                                                                                                                                                                                                                                                                           |
|---------------------------------------------------------------------------|------------------------------------------------------|----------------------------------------------------------------|-----------------------------------------------------------|--------------------------|--------------------------|-------------------------|---------------------------------------------------------------------------------------------------------------------------------------------------------------------------------------------------------------------------------------------------------------------------|
| Hendrix, 2005(121)<br>N = 5,182<br>12 month followup                      | Estrogen alone: 0.63mg of conjugated equine estrogen | Placebo                                                        | Incident urge UI                                          | (210/1526)<br>[184/1547] | 1.16<br>(0.96; 1.39)     | 0.02<br>(-0.01; 0.02)   | Intention to treat Double-blind. Central randomization at a 1:1 ratio. The study pill bottles had unique bar codes and computer-based selection to enable double-blinded dispensing. Incontinence - secondary outcome. Baseline data confirmed adequacy of randomization. |
| Goldstein, 2002(172)<br>N = 2,924<br>36 month followup                    | Levorneloxifene 0.5mg/day                            | Placebo                                                        | Self reported micturition frequency in both active groups | (184/978)<br>[39/970]    | <b>4.7 (3.4; 6.5)</b>    | 0.15<br>(0.12; 0.18)    | Intention to treat not stated. Double-blind. No justification for the sample size. Allocation concealment unclear. Only a subset of the data was ever validated; no summary statistics were calculated for demographic data. No justification for sample size.            |
| Long, 2006(170)<br>N = 73<br>3 months followup                            | Oral 0.63mg of conjugated equine estrogen per tablet | Topical 0.63mg conjugated equine estrogen per 1g vaginal cream | Urinary frequency                                         | (3/37)<br>[12/36]        | <b>0.24 (0.07; 0.79)</b> | -0.25<br>(-0.43; -0.07) | No Intention to treat. Two investigators were blind to each other's results. Allocation concealment unclear. No justification for the sample size. No comparison provided between groups, before/after treatments only.                                                   |
| Jackson, 1999(167)<br>N = 67,<br>urodynamic stress UI<br>6 month followup | Oestradiol valerate 2mg/day                          | Placebo                                                        | UI with intercourse                                       | (2/33)<br>[1/34]         | 2.06<br>(0.20; 21.65)    | 0.03<br>(-0.07; 0.13)   | No Intention to treat. Double-blind Randomization (computer generated simple random sampling) by hospital pharmacy. Allocation concealment unclear Sample size justified for the primary outcome-% of total collagen. No baseline comparison reported                     |
| Long, 2006(170)<br>N = 73<br>3 month followup                             | Oral 0.63mg of conjugated equine estrogen per tablet | Topical 0.63mg conjugated equine estrogen per 1g vaginal cream | Urge UI                                                   | (2/37)<br>[3/36]         | 0.65<br>(0.12; 3.66)     | -0.03<br>(-0.15; 0.09)  | No Intention to treat. Two investigators were blind to each other's results. Allocation concealment unclear. No justification for the sample size. No comparison provided between groups, before/after treatments only.                                                   |

|                                                      |                                                                                                   |         |                                                             |                        |                                        |                          |                                                                                                                                                                                                                                                                           |
|------------------------------------------------------|---------------------------------------------------------------------------------------------------|---------|-------------------------------------------------------------|------------------------|----------------------------------------|--------------------------|---------------------------------------------------------------------------------------------------------------------------------------------------------------------------------------------------------------------------------------------------------------------------|
| Goldstein, 2005(123)<br>N = 619<br>36 month followup | Conjugated equine estrogen<br>0.63 mg/d                                                           | Placebo | Incident UI                                                 | (8/158)<br>[1/152]     | 7.70<br>(0.97;<br>60.80)               | 0.04<br>(0.01;<br>0.08)  | Intention to treat. Double-blind. Randomized block design (block size = 4); baseline data confirmed adequate randomization.<br>No justification of sample size.<br>Incontinence - secondary outcome.                                                                      |
| Hendrix, 2005(121)<br>N = 5,182<br>12 month followup | Estrogen alone:<br>0.63mg of conjugated equine estrogen plus 2.5mg of medroxyprogesterone acetate | Placebo | Incident mixed UI                                           | (76/1526)<br>[50/1547] | <b>1.54</b><br><b>(1.09;<br/>2.19)</b> | 0.02<br>(0.00;<br>0.03)  | Intention to treat Double-blind. Central randomization at a 1:1 ratio. The study pill bottles had unique bar codes and computer-based selection to enable double-blinded dispensing. Incontinence - secondary outcome. Baseline data confirmed adequacy of randomization. |
|                                                      |                                                                                                   | Placebo | Incident mixed UI                                           | (99/2675)<br>[69/2507] | 1.34<br>(0.99;<br>1.82)                | 0.01<br>(0.00;<br>0.02)  |                                                                                                                                                                                                                                                                           |
| Warming, 2003(173)<br>N = 301<br>12 month followup   | Levomeloxifene<br>1.25, 5,10, or 20 mg per day                                                    | Placebo | UI (including worsening of a previously existing condition) | (5)<br>[0]             |                                        | 0.02<br>(-0.01;<br>0.06) | Intention to treat not stated. Double-blind. Allocation Concealment unclear. No justification for sample size. Outcomes reported independent of the dose of levormeloxifene.                                                                                              |
| Goldstein, 2005(123)<br>N = 619<br>36 month followup | Raloxifene,<br>60mg/day                                                                           | Placebo | Incident UI                                                 | (1/152)<br>[1/152]     | 1.00<br>(0.06;<br>15.84)               | 0.00<br>(-0.02;<br>0.02) | Intention to treat. Double-blind. Randomized block design (block size = 4); baseline data confirmed adequate randomization.<br>No justification of sample size.<br>Incontinence - secondary outcome.                                                                      |
|                                                      | Raloxifene,<br>150mg/day                                                                          | Placebo | Incident UI                                                 | (1/157)<br>[1/152]     | 0.97<br>(0.06;<br>15.34)               | 0.00<br>(-0.02;<br>0.02) |                                                                                                                                                                                                                                                                           |
| Waetjen, 2004(165)<br>N = 963<br>36 month followup   | Raloxifene<br>60mg/day or<br>Raloxifene<br>120mg/day                                              | Placebo | Restricts daily activities:<br>sometimes at 3 years         | (389/638)<br>[198/325] | 1.0 (0.9;<br>1.1)                      | 0.00<br>(-0.06;<br>0.07) | No intention to treat Open label. Randomization and allocation concealment not reported. Baseline data confirmed adequacy of randomization.<br>Sample size justified.                                                                                                     |
|                                                      |                                                                                                   |         | Effect on feelings:<br>Somewhat at 3 years                  | (373/638)<br>[191/325] | 1.0<br>(0.9;<br>1.1)                   | 0.00<br>(-0.07;<br>0.06) |                                                                                                                                                                                                                                                                           |

|                                                                           |                                        |                  |                                                                                                             |                        |                                 |                                    |                                                                                                                                                                                                                                                                                                                             |
|---------------------------------------------------------------------------|----------------------------------------|------------------|-------------------------------------------------------------------------------------------------------------|------------------------|---------------------------------|------------------------------------|-----------------------------------------------------------------------------------------------------------------------------------------------------------------------------------------------------------------------------------------------------------------------------------------------------------------------------|
| Jackson, 1999(167)<br>N = 67,<br>urodynamic stress UI<br>6 month followup | Post oestradiol valerate 2mg/day       | Post placebo     | More than 7 episodes of nocturnal incontinence                                                              | (31/33)<br>[28/34]     | 1.1<br>(1.0; 1.4)               | 0.12<br>(-0.04; 0.27)              | No Intention to treat.<br>Double-blind<br>Randomization (computer generated simple random sampling) by hospital pharmacy.<br>Allocation concealment unclear<br>Sample size justified for the primary outcome-% of total collagen.<br>No baseline comparison reported                                                        |
| Waetjen, 2005(125)<br>N = 417<br>36 month followup                        | 14mg/day transdermal E2 for 4 months   | Placebo 4 months | Unchanged urge incontinence: the number of incontinence episodes/week increased or decreased no more than 1 | (178/208)<br>[162/209] | <b>1.1</b><br><b>(1.0; 1.2)</b> | <b>0.08</b><br><b>(0.01; 0.15)</b> | Intention to treat. Double-blind.<br>Computer-generated randomization stratified by clinical center in blocks of 4. Treatment numbers were printed on labels adhered to identical-looking study medications. Allocation concealment adequate. Baseline data confirmed the adequacy of randomization. Sample size justified. |
| Goldstein, 2005(123)<br>N = 619<br>36 month followup                      | Conjugated equine estrogen 0.625mg/day | Placebo          | Severity of incontinence: moderate or severe                                                                | (9/158)<br>[1/152]     | <b>8.66(1.1;67.52)</b>          | <b>0.05</b><br><b>(0.01;0.09)</b>  | Intention to treat. Double-blind.<br>Randomized block design (block size = 4); baseline data confirmed adequate randomization.<br>No justification of sample size.<br>Incontinence - secondary outcome.                                                                                                                     |
| Jackson, 1999(167)<br>N = 67,<br>urodynamic stress UI<br>6 month followup | Post oestradiol valerate 2mg/day       | Post placebo     | More than 7 episodes of daytime incontinence                                                                | (25/33)<br>[23/34]     | 1.1<br>(0.8; 1.5)               | 0.08<br>(-0.13; 0.30)              | No Intention to treat.<br>Double-blind<br>Randomization (computer generated simple random sampling) by hospital pharmacy.<br>Allocation concealment unclear<br>Sample size justified for the primary outcome-% of total collagen.<br>No baseline comparison reported                                                        |
| Vardy, 2003(139)<br>N = 58<br>5 month                                     | Raloxifene 60mg                        | Placebo          | Consideration of any indicator of prolapse.                                                                 | (11/15)<br>[2/13]      | <b>4.8 (1.3; 17.7)</b>          | 0.58<br>(0.28; 0.88)               | Intention to treat not stated. Double-blind.<br>Allocation concealment unclear. Subjects had Incontinence at baseline (32.7%) with unknown distribution in the groups.<br>No justification for sample size.                                                                                                                 |

|                                                        |                                                                                               |                      |                                                                                                               |                     |                                    |                                    |                                                                                                                                                                                                                                                                                                                          |
|--------------------------------------------------------|-----------------------------------------------------------------------------------------------|----------------------|---------------------------------------------------------------------------------------------------------------|---------------------|------------------------------------|------------------------------------|--------------------------------------------------------------------------------------------------------------------------------------------------------------------------------------------------------------------------------------------------------------------------------------------------------------------------|
| Waetjen, 2005(125)<br>N = 417<br>24 month followup     | 14mg/day transdermal E2 for 2 years                                                           | Placebo 2 years      | Unchanged stress incontinence: the number of incontinence episodes/week increased or decreased no more than 1 | (151/208) [129/209] | <b>1.2</b><br><b>(1.0; 1.3)</b>    | 0.11<br>(0.02; 0.20)               | Intention to treat. Double-blind. Computer-generated randomization stratified by clinical center in blocks of 4. Treatment numbers were printed on labels adhered to identical-looking study medications. Allocation concealment adequate. Baseline data confirmed the adequacy of randomization. Sample size justified. |
| Vardy, 2003(139)<br>N = 58<br>5 month followup         | Raloxifene 60mg                                                                               | Placebo              | Pelvic organ prolapse quantitation, % of subjects with worsened scores                                        | (10/15) [2/13]      | <b>4.3</b><br><b>(1.2; 16.3)</b>   | 0.51<br>(0.20; 0.82)               | Intention to treat not stated. Double-blind. Allocation concealment unclear. Subjects had Incontinence at baseline (32.7%) with unknown distribution in the groups. No justification for sample size.                                                                                                                    |
|                                                        | Tamoxifen 20mg;                                                                               | Placebo              | Consideration of any indicator of prolapse.                                                                   | (9/15) [2/13]       | <b>3.9 (1.0; 14.9)</b>             | <b>0.45</b><br><b>(0.13; 0.76)</b> |                                                                                                                                                                                                                                                                                                                          |
| Waetjen, 2004(165)<br>N = 963<br>36 month followup     | Raloxifene 60mg/day or Raloxifene 120mg/day                                                   | Placebo              | No change in urinary incontinence at 3 years                                                                  | (218/638) [119/325] | 0.9<br>(0.8; 1.1)                  | -0.02<br>(-0.09; 0.04)             | No intention to treat Open label. Randomization and allocation concealment not reported. Baseline data confirmed adequacy of randomization. Sample size justified.                                                                                                                                                       |
| Waetjen, 2005(125)<br>N = 417<br>4 months followup     | 14mg/day transdermal E2 for 4 months                                                          | Placebo for 4 months | Unchanged incontinence: ≤1 increase/decrease incontinence episodes/week                                       | (106/208) [95/209]  | 1.1<br>(0.9; 1.4)                  | 0.06<br>(-0.04; 0.15)              | Intention to treat. Double-blind. Computer-generated randomization stratified by clinical center in blocks of 4. Treatment numbers were printed on labels adhered to identical-looking study medications. Allocation concealment adequate. Baseline data confirmed the adequacy of randomization. Sample size justified. |
|                                                        |                                                                                               |                      | Wears protection for incontinence at 3 years                                                                  | (161/208) [67/209]  | 1.2 (1.0; 1.6)                     | 0.05<br>(-0.01; 0.10)              |                                                                                                                                                                                                                                                                                                                          |
| Grady, 2001(166)<br>N = 1,525<br>36-48 months followup | 0.625mg of conjugated estrogens plus 2.5mg of medroxyprogesterone acetate in one tablet daily | Placebo              | Worsened or markedly worsened 48 months                                                                       | (293/768) [202/757] | <b>1.43</b><br><b>(1.23; 1.66)</b> | 0.11<br>(0.07; 0.16)               | No Intention to treat. Double blind. Randomization using randomly permuted blocks of size 4 stratified by site. Allocation concealment adequate (reported previously). Sample size justified                                                                                                                             |
|                                                        |                                                                                               |                      | Worsened-increase ≥2/week episodes 48 months                                                                  | (290/768) [212/757] | <b>1.35</b><br><b>(1.17; 1.56)</b> | 0.10<br>(0.05; 0.14)               |                                                                                                                                                                                                                                                                                                                          |

|                                                                          |                                                                                               |              |                                                                          |                        |                                                 |                           |                                                                                                                                                                                                       |
|--------------------------------------------------------------------------|-----------------------------------------------------------------------------------------------|--------------|--------------------------------------------------------------------------|------------------------|-------------------------------------------------|---------------------------|-------------------------------------------------------------------------------------------------------------------------------------------------------------------------------------------------------|
|                                                                          |                                                                                               |              | Worsened-increase $\geq 2$ /week episodes 36 months                      | (256/768)<br>[187/757] | <b>1.35</b><br>( <b>1.15</b> ;<br><b>1.58</b> ) | 0.09<br>(0.04;<br>0.13)   |                                                                                                                                                                                                       |
| Vardy, 2003(139)<br>N = 58<br>5 month followup                           | Tamoxifen 20mg                                                                                | Placebo      | Increase or worsening in symptoms of incontinence                        | (5/15)<br>[2/13]       | 2.2<br>(0.5;<br>9.3)                            | 0.18<br>(-0.13;<br>0.49)  | Intention to treat not stated. Double-blind. Allocation concealment unclear. Subjects had Incontinence at baseline (32.7%) with unknown distribution in the groups. No justification for sample size. |
| Grady, 2001(166)<br>N = 1,525<br>24 months followup                      | 0.625mg of conjugated estrogens plus 2.5mg of medroxyprogesterone acetate in one tablet daily | Placebo      | Worsened-increase of at least 2/ week episodes 24 months                 | (246/768)<br>[178/757] | <b>1.36</b><br>( <b>1.16</b> ;<br><b>1.61</b> ) | 0.09<br>(0.04;<br>0.13)   | No Intention to treat. Double blind. Randomization using randomly permuted blocks of size 4 stratified by site. Allocation concealment adequate (reported previously). Sample size justified          |
| Vardy, 2003(139)<br>N = 58<br>5 month followup                           | Tamoxifen 20mg                                                                                | Placebo      | Pelvic organ prolapse quantitation, % of subjects with worsened scores   | (5/15)<br>[2/13]       | 2.2<br>(0.5;<br>9.3)                            | 0.18<br>(-0.13;<br>0.49)  | Intention to treat not stated. Double-blind. Allocation concealment unclear. Subjects had Incontinence at baseline (32.7%) with unknown distribution in the groups. No justification for sample size. |
| Grady, 2001(166)<br>N = 1,525<br>12 month followup                       | 0.625mg of conjugated estrogens plus 2.5mg of medroxyprogesterone acetate in one tablet daily | Placebo      | Worsened-increase of at least 2/ week episodes 12 months                 | (224/768)<br>[180/757] | <b>1.23</b><br>( <b>1.04</b> ;<br><b>1.45</b> ) | 0.05<br>(0.01;<br>0.10)   | No Intention to treat. Double blind. Randomization using randomly permuted blocks of size 4 stratified by site. Allocation concealment adequate (reported previously). Sample size justified          |
| Holtedahl, 1998(116)<br>N = 90,<br>positive pad test<br>6 month followup | Local estrogen in vagitories or jelly plus physiotherapy and electro stimulation              | No treatment | Unchanged incontinence: no changes in frequency, amount, or wet episodes | (10/36)<br>[27/44]     | <b>0.5</b><br>( <b>0.3</b> ;<br><b>0.8</b> )    | -0.34<br>(-0.54;<br>0.13) | No intention to treat. Randomization by phone from the university department. Allocation concealment unclear. Open label. Baseline data confirmed adequacy of randomization. Sample size justified.   |

|                                                    |                                                                                               |                  |                                                                                                |                     |                                              |                          |                                                                                                                                                                                                                                                                                                                          |
|----------------------------------------------------|-----------------------------------------------------------------------------------------------|------------------|------------------------------------------------------------------------------------------------|---------------------|----------------------------------------------|--------------------------|--------------------------------------------------------------------------------------------------------------------------------------------------------------------------------------------------------------------------------------------------------------------------------------------------------------------------|
| Grady, 2001(166)<br>N = 1,525<br>4 month followup  | 0.625mg of conjugated estrogens plus 2.5mg of medroxyprogesterone acetate in one tablet daily | Placebo          | Worsened-increase of at least 2/ week episodes 4 months                                        | (202/768) [166/757] | <b>1.20</b><br><b>(1.00;</b><br><b>1.43)</b> | 0.04<br>(0.00;<br>0.09)  | No Intention to treat. Double blind. Randomization using randomly permuted blocks of size 4 stratified by site. Allocation concealment adequate (reported previously). Sample size justified                                                                                                                             |
| Vardy, 2003(139)<br>N = 58<br>5 month followup     | Conjugated equine estrogen 0.625mg                                                            | Placebo          | Pelvic organ prolapse quantitation, % of subjects with worsened scores                         | (4/15) [2/13]       | 1.7<br>(0.4;<br>8.0)                         | 0.11<br>(-0.18;<br>0.41) | Intention to treat not stated. Double-blind. Allocation concealment unclear. Subjects had Incontinence at baseline (32.7%) with unknown distribution in the groups. No justification for sample size.                                                                                                                    |
| Waetjen, 2005(125)<br>N = 417<br>36 month followup | 14mg/day transdermal E2 for 4 months                                                          | Placebo 4 months | Worsened incontinence: the number of incontinence episodes/week increased by 2 or more         | (50/208) [40/209]   | 1.3<br>(0.9;<br>1.8)                         | 0.05<br>(-0.03;<br>0.13) | Intention to treat. Double-blind. Computer-generated randomization stratified by clinical center in blocks of 4. Treatment numbers were printed on labels adhered to identical-looking study medications. Allocation concealment adequate. Baseline data confirmed the adequacy of randomization. Sample size justified. |
| Waetjen, 2004(165)<br>N = 963<br>36 month followup | Raloxifene 60mg/day or Raloxifene 120mg/day                                                   | Placebo          | Incontinent episodes <1/month at 3 years                                                       | (146/638) [67/325]  | 1.1 (0.9;<br>1.4)                            | 0.02<br>(-0.03;<br>0.08) | No intention to treat Open label. Randomization and allocation concealment not reported. Baseline data confirmed adequacy of randomization. Sample size justified.                                                                                                                                                       |
| Waetjen, 2005(125)<br>N = 417<br>36 month followup | 14mg/day transdermal E2 for 4 months                                                          | Placebo 4 months | Worsened stress incontinence: the number of incontinence episodes/week increased by 2 or more. | (42/208) [28/209]   | 1.5<br>(1.0;<br>2.3)                         | 0.07<br>(0.00;<br>0.14)  | Intention to treat. Double-blind. Computer-generated randomization stratified by clinical center in blocks of 4. Treatment numbers were printed on labels adhered to identical-looking study medications. Allocation concealment adequate. Baseline data confirmed the adequacy of randomization. Sample size justified. |

|                                                          |                                             |                 |                                                                                              |                       |                   |                        |                                                                                                                                                                                                                                                                                                                          |
|----------------------------------------------------------|---------------------------------------------|-----------------|----------------------------------------------------------------------------------------------|-----------------------|-------------------|------------------------|--------------------------------------------------------------------------------------------------------------------------------------------------------------------------------------------------------------------------------------------------------------------------------------------------------------------------|
| Vestergaard, 2003(140)<br>N = 1,006<br>60 month followup | Sequential oral oestrogen and progestogen   | No HRT          | Frequent voiding: Moderate to severe discomfort (2-4)                                        | (100/502)<br>[96/504] | 1.0<br>(0.8; 1.3) | 0.01<br>(-0.04; 0.06)  | Intention to treat. Open label. Group 1 and 2 were block-randomized in groups of ten by the envelope method. Baseline data providing difference between treatment regimens not analyzed. No justification for sample size. Outcomes reported in two groups: HRT vs. No HRT.                                              |
| Vardy, 2003(139)<br>N = 58<br>5 month followup           | Raloxifene 60mg                             | Placebo         | Increase or worsening in symptoms of incontinence                                            | (2/15)<br>[2/13]      | 0.9<br>(0.1; 5.3) | -0.02<br>(-0.28; 0.24) | Intention to treat not stated. Double-blind. Allocation concealment unclear. Subjects had Incontinence at baseline (32.7%) with unknown distribution in the groups. No justification for sample size.                                                                                                                    |
| Waetjen, 2005(125)<br>N = 417<br>24 month followup       | 14mg/day transdermal E2 for 2 years         | Placebo 2 years | Worsened incontinence: the number of incontinence episodes/week increased by 2 or more.      | (35/208)<br>[35/209]  | 1.0<br>(0.7; 1.5) | 0.00<br>(-0.07; 0.07)  | Intention to treat. Double-blind. Computer-generated randomization stratified by clinical center in blocks of 4. Treatment numbers were printed on labels adhered to identical-looking study medications. Allocation concealment adequate. Baseline data confirmed the adequacy of randomization. Sample size justified. |
| Vardy, 2003(139)<br>N = 58<br>5 month followup           | Raloxifene 60mg                             | Placebo         | Increase or worsening in symptoms of incontinence                                            | (2/15)<br>[2/13]      | 0.9<br>(0.1; 5.3) | -0.02<br>(-0.28; 0.24) | Intention to treat not stated. Double-blind. Allocation concealment unclear. Subjects had Incontinence at baseline (32.7%) with unknown distribution in the groups. No justification for sample size.                                                                                                                    |
| Waetjen, 2004(165)<br>N = 963<br>36 month followup       | Raloxifene 60mg/day or Raloxifene 120mg/day | Placebo         | Worsened urinary incontinence at 3 years                                                     | (53/638)<br>[21/325]  | 1.3<br>(0.8; 2.1) | 0.02<br>(-0.02; 0.05)  | No intention to treat Open label. Randomization and allocation concealment not reported. Baseline data confirmed adequacy of randomization. Sample size justified.                                                                                                                                                       |
| Waetjen, 2005(125)<br>N = 417<br>36 month followup       | 14mg/day transdermal E2 for 2 years         | Placebo 2 years | Worsened urge incontinence: the number of incontinence episodes/week increased by 2 or more. | (27/208)<br>[38/209]  | 0.7<br>(0.5; 1.1) | -0.05<br>(-0.12; 0.02) | Intention to treat. Double-blind. Computer-generated randomization stratified by clinical center in blocks of 4. Treatment numbers were printed on labels adhered to identical-looking study medications. Allocation concealment adequate. Baseline data confirmed the adequacy of randomization. Sample size justified. |

|                                                                          |                                                                                  |                 |                                                                                                |                      |                        |                         |                                                                                                                                                                                                                                                                                                                          |
|--------------------------------------------------------------------------|----------------------------------------------------------------------------------|-----------------|------------------------------------------------------------------------------------------------|----------------------|------------------------|-------------------------|--------------------------------------------------------------------------------------------------------------------------------------------------------------------------------------------------------------------------------------------------------------------------------------------------------------------------|
| Holtedahl, 1998(116)<br>N = 90,<br>positive pad test<br>6 month followup | Local estrogen in vagitories or jelly plus physiotherapy and electro stimulation | No treatment    | Worse incontinence: self reported worsening of severity or impact                              | (4/36)<br>[13/44]    | 0.4<br>(0.1; 1.1)      | -0.18<br>(-0.35; -0.01) | No intention to treat. Randomization by phone from the university department. Allocation concealment unclear. Open label. Baseline data confirmed adequacy of randomization. Sample size justified.                                                                                                                      |
| Waetjen, 2005(125)<br>N = 417<br>24 month followup                       | 14mg/day transdermal E2 for 2 years                                              | Placebo 2 years | Worsened stress incontinence: the number of incontinence episodes/week increased by 2 or more. | (20/208)<br>[19/209] | 1.1<br>(0.6; 1.9)      | 0.01<br>(-0.05; 0.06)   | Intention to treat. Double-blind. Computer-generated randomization stratified by clinical center in blocks of 4. Treatment numbers were printed on labels adhered to identical-looking study medications. Allocation concealment adequate. Baseline data confirmed the adequacy of randomization. Sample size justified. |
| Waetjen, 2004(165)<br>N = 963<br>36 month followup                       | Raloxifene 60mg/day or Raloxifene 120mg/day                                      | Placebo         | Incontinent episodes/day at 3 years                                                            | (57/638)<br>[22/325] | 1.3 (0.8; 2.1)         | 0.02<br>(-0.01; 0.06)   | No intention to treat Open label. Randomization and allocation concealment not reported. Baseline data confirmed adequacy of randomization. Sample size justified.                                                                                                                                                       |
| Vestergaard, 2003(140)<br>N = 1,006<br>60 month followup                 | Sequential oral oestrogen and progestogen oral continuous oestradiol             | No HRT          | Incontinence with moderate to severe discomfort (2-4)                                          | (40/502)<br>[45/504] | 0.9 (0.6; 1.3)         | -0.01<br>(-0.04; 0.02)  | Intention to treat. Open label. Group 1 and 2 were block-randomized in groups of ten by the envelope method. Baseline data providing difference between treatment regimens not analyzed. No justification for sample size. Outcomes reported in two groups: HRT vs. No HRT.                                              |
| Goldstein, 2005(123)<br>N = 619<br>36 month followup                     | Conjugated equine estrogen 0.625mg/day                                           | Placebo         | New or worsening urinary incontinence during the study                                         | (11/158)<br>[2/152]  | <b>5.3 (1.2; 23.5)</b> | 0.06<br>(0.01; 0.10)    | Intention to treat. Double-blind. Randomized block design (block size = 4); baseline data confirmed adequate randomization. No justification of sample size. Incontinence - secondary outcome.                                                                                                                           |
| Waetjen, 2004(165)<br>N = 963<br>36 month followup                       | Raloxifene 60mg/day or Raloxifene 120mg/day                                      | Placebo         | Severe and very severe at 3 years                                                              | (29/638)<br>[14/325] | 1.1 (0.6; 2.0)         | 0.00<br>(-0.02; .03)    | No intention to treat Open label. Randomization and allocation concealment not reported. Baseline data confirmed adequacy of randomization. Sample size justified.                                                                                                                                                       |

|                                                             |                                                                              |                  |                                                                                              |                  |                       |                      |                                                                                                                                                                                                                                                                                                                          |
|-------------------------------------------------------------|------------------------------------------------------------------------------|------------------|----------------------------------------------------------------------------------------------|------------------|-----------------------|----------------------|--------------------------------------------------------------------------------------------------------------------------------------------------------------------------------------------------------------------------------------------------------------------------------------------------------------------------|
| Warming, 2003(173)<br>N = 301<br>12 month followup          | Levormeloxifene 1.25, 5, 10, or 20mg/day                                     | Placebo          | Urogenital prolapse                                                                          | (6/201) [0/50]   | 3.3 (0.2; 57.3)       | 0.03 (-0.01; 0.07)   | Intention to treat not stated. Double-blind. Allocation Concealment unclear. No justification for sample size. Outcomes reported independent of the dose of levormeloxifene.                                                                                                                                             |
| Waetjen, 2005(125)<br>N = 417<br>4 months followup          | 14mg/day transdermal E2 for 4 months                                         | Placebo 4 months | Worsened urge incontinence: the number of incontinence episodes/week increased by 2 or more. | (5/208) [21/209] | <b>0.2</b> (0.1; 0.6) | -0.08 (-0.12; -0.03) | Intention to treat. Double-blind. Computer-generated randomization stratified by clinical center in blocks of 4. Treatment numbers were printed on labels adhered to identical-looking study medications. Allocation concealment adequate. Baseline data confirmed the adequacy of randomization. Sample size justified. |
| Warming, 2003(173)<br>N = 301<br>12months after active drug | 12 months after discontinuation of levormeloxifene 1.25, 5, 10, or 20mg/day, | Placebo          | Urogenital prolapse                                                                          | (2/201) [0/50]   | 1.3 (0.1; 25.9)       | 0.01 (-0.02; 0.04)   | Intention to treat not stated. Double-blind. Allocation Concealment unclear. No justification for sample size. Outcomes reported independent of the dose of levormeloxifene.                                                                                                                                             |
| Waetjen, 2004(165)<br>N = 963<br>36 month followup          | Raloxifene 60mg/day or Raloxifene 120mg/day                                  | Placebo          | Restricts daily activities: Most of the time at 3 years                                      | (3/638) [2/325]  | 0.8 (0.1; 4.6)        | 0.00 (-0.01; 0.01)   | No intention to treat Open label. Randomization and allocation concealment not reported. Baseline data confirmed adequacy of randomization. Sample size justified.                                                                                                                                                       |
| Goldstein, 2005(123)<br>N = 619<br>36 month followup        | Raloxifene, 150mg/day                                                        | Placebo          | New or worsening UI during the study                                                         | (1/157) [2/152]  | 0.48 (0.04; 5.3)      | -0.01 (-0.03; 0.02)  | Intention to treat. Double-blind. Randomized block design (block size = 4); baseline data confirmed adequate randomization. No justification of sample size. Incontinence - secondary outcome.                                                                                                                           |

\*Bold - significant relative risk at 95% confidence level. HRT = hormone replacement therapy; UI = urinary incontinence.
