# Supplementary material
Source: HighWire-hosted journal article supplement (https://www.annals.org/content/suppl/2008/02/12/0000605-200803180-00211)
Supplement: Kane_AT08_148-6-458-DC1-8.pdf [file Kane_AT08_148-6-458-DC1-8.pdf]

*Appendix Table 8. Effects of Serotonin and the Noradrenaline Reuptake Inhibitor Duloxetine on Stress UI : Results from Randomized Controlled Clinical Trials (70)\**

| Author Year               | Daily Dose of Duloxetine | Control Treatment | Outcomes           | (Events/Active Treatment) [Events/Control Treatment] | Relative Risk (95% CI)   | Risk Difference (95% CI) | Quality                                                                                       |
|---------------------------|--------------------------|-------------------|--------------------|------------------------------------------------------|--------------------------|--------------------------|-----------------------------------------------------------------------------------------------|
| Dmochowski, 2003(71)      | 80mg                     | Placebo NT        | Failure to cure    | (308/344) [319/339]                                  | 0.95 (0.91; 1.00)        | -0.05 (-0.09; 0.00)      | Intention to treat. Double blind. Allocation concealment adequate. Sample size not justified. |
| Millard, 2004(72)         | 80mg                     | Placebo or NT     | Failure to cure    | (211/227) [217/231]                                  | 0.99 (0.94; 1.04)        | -0.01 (-0.06; 0.04)      | Intention to treat. Double blind. Allocation concealment adequate. Sample size justified      |
| Norton, 2002(73)          | 80mg                     | Placebo or NT     | Failure to cure    | (100/123) [112/132]                                  | 0.96 (0.86; 1.07)        | -0.04 (-0.13; 0.06)      | Intention to treat. Double blind. Allocation concealment adequate. Sample size justified      |
|                           | 40mg                     | Placebo or NT     | Failure to cure    | (93/123) [112/132]                                   | 0.89 (0.79; 1.01)        | -0.09 (-0.19; 0.01)      |                                                                                               |
|                           | 20mg                     | Placebo or NT     | Failure to cure    | (107/128) [112/132]                                  | 0.99 (0.89; 1.09)        | -0.01 (-0.10; 0.08)      |                                                                                               |
| Cardozo, 2004(74)         | 80mg                     | Placebo or NT     | Failure to improve | (16/46) [45/52]                                      | <b>0.40</b> (0.27; 0.61) | -0.52 (-0.68; -0.35)     | Intention to treat. Double blind. Allocation concealment adequate. Sample size justified      |
| Dmochowski, 2003(71)      | 80mg                     | Placebo or NT     | Failure to improve | (167/344) [225/339]                                  | <b>0.73</b> (0.64; 0.84) | -0.18 (-0.25; -0.11)     | Intention to treat. Double blind. Allocation concealment adequate. Sample size not justified. |
| Millard, 200(72)          | 80mg                     | Placebo or NT     | Failure to improve | (92/227) [100/231]                                   | 0.94 (0.75; 1.16)        | -0.03 (-0.12; 0.06)      | Intention to treat. Double blind. Allocation concealment adequate. Sample size justified      |
| Van Kerrebroeck, 2004(75) | 80mg                     | Placebo or NT     | Failure to improve | (119/247) [164/247]                                  | <b>0.73</b> (0.62; 0.85) | -0.18 (-0.27; -0.10)     | Intention to treat. Double blind. Allocation concealment adequate. Sample size justified      |

|                         |      |               |                                        |                        |                                    |                         |                                                                                               |
|-------------------------|------|---------------|----------------------------------------|------------------------|------------------------------------|-------------------------|-----------------------------------------------------------------------------------------------|
| Zinner,<br>1998(77)     | 40mg | Placebo or NT | Failure to improve                     | (18/33)<br>[29/34]     | <b>0.64</b><br><b>(0.45; 0.90)</b> | -0.31<br>(-0.51; -0.10) | Intention to treat. Double blind. Allocation concealment unclear. Sample size justified       |
| Mulcahy,<br>1996(76)    | 20mg | Placebo or NT | Failure to improve                     | (13/55)<br>[19/37]     | <b>0.46</b><br><b>(0.26; 0.81)</b> | -0.28<br>(-0.47; -0.08) | No Intention to treat. Double blind. Allocation concealment unclear. Sample size justified    |
| Zinner,<br>1998(77)     | 20mg | Placebo or NT | Failure to improve                     | (18/34)<br>[29/34]     | <b>0.62</b><br><b>(0.44; 0.88)</b> | -0.32<br>(-0.53; -0.12) | Intention to treat. Double blind. Allocation concealment unclear. Sample size justified       |
|                         | 30mg | Placebo or NT | Failure to improve                     | (10/26)<br>[29/34]     | <b>0.45</b><br><b>(0.27; 0.75)</b> | -0.47<br>(-0.69; -0.25) | Intention to treat. Double blind. Allocation concealment unclear. Sample size justified       |
| Norton,<br>2002(73)     | 80mg | Placebo or NT | Failure to cure<br>(objective - SPT)   | (69/113)<br>[72/114]   | 0.97<br>(0.79; 1.18)               | -0.02<br>(-0.15; 0.11)  | Intention to treat. Double blind. Allocation concealment adequate. Sample size justified      |
|                         | 40mg | Placebo or NT | Failure to cure<br>(objective - SPT)   | (63/111)<br>[72/114]   | 0.90<br>(0.73; 1.11)               | -0.06<br>(-0.19; 0.06)  |                                                                                               |
|                         | 20mg | Placebo or NT | Failure to cure<br>(objective - SPT)   | (75/110)<br>[72/114]   | 1.08<br>(0.89; 1.30)               | 0.05<br>(-0.07; 0.17)   |                                                                                               |
|                         | 80mg | Placebo or NT | Failure to cure<br>(objective - CST)   | (96/114)<br>[103/118]  | 0.96<br>(0.87; 1.07)               | -0.03<br>(-0.12; 0.06)  |                                                                                               |
|                         | 40mg | Placebo or NT | Failure to cure<br>(objective - SPT)   | (86/112)<br>[103/118]  | <b>0.88</b><br><b>(0.78; 0.99)</b> | -0.11<br>(-0.20; -0.01) |                                                                                               |
|                         | 20mg | Placebo or NT | Failure to cure<br>(objective - CST)   | (101/112)<br>[103/118] | 1.03<br>(0.94; 1.13)               | 0.03<br>(-0.05; 0.11)   |                                                                                               |
| Dmochowski,<br>2003(71) | 80mg | Placebo or NT | Failure to cure<br>(objective - diary) | (308/344)<br>[319/339] | 0.95<br>(0.91; 1.00)               | -0.05<br>(-0.09; 0.00)  | Intention to treat. Double blind. Allocation concealment adequate. Sample size not justified. |
| Millard,<br>2004(72)    | 80mg | Placebo or NT | Failure to cure<br>(objective - diary) | (211/227)<br>[217/231] | 0.99<br>(0.94; 1.04)               | -0.01<br>(-0.06; 0.04)  | Intention to treat. Double blind. Allocation concealment adequate. Sample size justified      |
| Norton,<br>2002(73)     | 80mg | Placebo or NT | Failure to cure<br>(objective - diary) | (100/123)<br>[112/132] | 0.96<br>(0.86; 1.07)               | -0.04<br>(-0.13; 0.06)  | Intention to treat. Double blind. Allocation concealment adequate. Sample size justified      |
|                         | 40mg | Placebo or NT |                                        | (93/123)<br>[112/132]  | 0.89<br>(0.79; 1.01)               | -0.09<br>(-0.19; 0.01)  |                                                                                               |
|                         | 20mg | Placebo or NT |                                        | (107/128)<br>[112/132] | 0.99<br>(0.89; 1.09)               | -0.01<br>(-0.10; 0.08)  |                                                                                               |

|                           |             |                              |                                                                             |                                              |                                     |                         |                                                                                             |  |
|---------------------------|-------------|------------------------------|-----------------------------------------------------------------------------|----------------------------------------------|-------------------------------------|-------------------------|---------------------------------------------------------------------------------------------|--|
| Cardozo, 2004(74)         | 80mg        | Placebo or NT                | Status ('very much better,' 'much better,' or 'a little better' from PGI-I) | (17/51)<br>[4/52]                            | <b>4.33</b><br><b>(1.57; 12.00)</b> | 0.26<br>(0.11; 0.40)    | Intention to treat. Double blind. Allocation concealment adequate. Sample size justified    |  |
| Kinchen, 2005(128)        | 80mg        | Placebo or NT                | Status ('very much better,' 'much better,' or 'a little better' from PGI-I) | (110/224)<br>[93/227]                        | 1.20<br>(0.98; 1.47)                | 0.08<br>(-0.01; 0.17)   | No Intention to treat. Double blind. Allocation concealment adequate. Sample size justified |  |
| Millard, 2004(72)         | 80mg        | Placebo or NT                | Status ('very much better,' 'much better,' or 'a little better' from PGI-I) | (167/227)<br>[148/231]                       | 1.15<br>(1.01; 1.30)                | 0.09<br>(0.01; 0.18)    | Intention to treat. Double blind. Allocation concealment adequate. Sample size justified    |  |
| Norton, 2002(73)          | 80mg        | Placebo or NT                | Status ('very much better,' 'much better,' or 'a little better' from PGI-I) | (62/140)<br>[37/138]                         | <b>1.65</b><br><b>(1.18; 2.30)</b>  | 0.17<br>(0.06; 0.29)    | Intention to treat. Double blind. Allocation concealment adequate. Sample size justified    |  |
| Van Kerrebroeck, 2004(75) | 80mg        | Placebo or NT                | Status ('very much better,' 'much better,' or 'a little better' from PGI-I) | (139/247)<br>[119/247]                       | 1.17<br>(0.99; 1.38)                | 0.08<br>(0.01; 0.17)    | Intention to treat. Double blind. Allocation concealment adequate. Sample size justified    |  |
| Ghoniem 2005(78)          | 80mg + PFMT | Placebo                      | Numbers not cured (objective - diary)                                       | (17/44)<br>[33/44]                           | <b>0.52</b><br><b>(0.34;0.78)</b>   | -0.36<br>(-0.56; -0.17) | Intention to treat. Double blind.                                                           |  |
|                           | 80mg        | Pelvic Floor Muscle Training |                                                                             | (20/46)<br>[34/46]                           | <b>0.59</b><br><b>(0.41;0.85)</b>   | -0.30<br>(-0.50; -0.11) | Allocation concealment adequate. Sample size justified                                      |  |
| Steers† 2007(129)         | 120mg       | Placebo                      | Status ('very much better,' 'much better' or 'a little better' from PGI-I)  | (81/153)<br>[63/153]                         | <b>1.29</b><br><b>(1.01;1.64)</b>   | 0.12<br>(0.01; 0.23)    | Intention to treat. Double blind. Allocation concealment unclear. Sample size justified     |  |
| Norton, 2002(73)          | 40mg        | Placebo or NT                | Status ('very much better,' 'much better,' or 'a little better' from PGI-I) | (51/137)<br>[37/138]                         | 1.39<br>(0.98; 1.97)                | 0.10<br>(-0.01; 0.21)   | Intention to treat. Double blind. Allocation concealment adequate.                          |  |
|                           | 20mg        | Placebo or NT                |                                                                             | (43/138)<br>[37/138]                         | 1.16<br>(0.80; 1.68)                | 0.04<br>(-0.06; 0.15)   | Sample size justified                                                                       |  |
|                           | 80mg        | Duloxetine 40mg              |                                                                             | Failure to cure (quantification of symptoms) | (100/123)<br>[93/123]               | 1.08<br>(0.94; 1.23)    | 0.06<br>(-0.05; 0.16)                                                                       |  |
|                           | 80mg        | Duloxetine 20mg              |                                                                             |                                              | (100/123)<br>[107/128]              | 1.08<br>(0.94; 1.23)    | -0.02<br>(-0.12; 0.07)                                                                      |  |

|                     |      |                    |                                                                                                        |                        |                                    |                         |                                                                                                   |
|---------------------|------|--------------------|--------------------------------------------------------------------------------------------------------|------------------------|------------------------------------|-------------------------|---------------------------------------------------------------------------------------------------|
|                     | 80mg | Duloxetine<br>20mg |                                                                                                        | (100/123)<br>[107/128] | 0.97<br>(0.87; 1.09)               | -0.02<br>(-0.12; 0.07)  |                                                                                                   |
|                     | 40mg | Duloxetine<br>20mg |                                                                                                        | (93/123)<br>[107/128]  | 0.90<br>(0.80; 1.03)               | -0.08<br>(-0.18; 0.02)  |                                                                                                   |
| Zinner,<br>1998(77) | 30mg | Duloxetine<br>20mg | Failure to cure<br>(quantification of<br>symptoms)                                                     | (10/26)<br>[18/34]     | 0.73<br>(0.41; 1.30)               | -0.14<br>(-0.40; 0.11)  | Intention to treat. Double<br>blind. Allocation<br>concealment unclear.<br>Sample size justified  |
|                     | 40mg | Duloxetine<br>20mg |                                                                                                        | (18/33)<br>[18/34]     | 1.03<br>(0.66; 1.61)               | 0.02<br>(-0.22; 0.25)   |                                                                                                   |
|                     | 40mg | Duloxetine<br>30mg |                                                                                                        | (18/33)<br>[10/26]     | 1.42<br>(0.80; 2.53)               | 0.16<br>(-0.09; 0.41)   |                                                                                                   |
|                     |      |                    |                                                                                                        |                        |                                    |                         |                                                                                                   |
| Norton,<br>2002(73) | 80mg | Duloxetine<br>40mg | Failure to cure<br>(objective - SPT)                                                                   | (6/113)<br>[63/111]    | 1.08<br>(0.86; 1.34)               | -0.51<br>(-0.62; -0.41) | Intention to treat. Double<br>blind. Allocation<br>concealment adequate.<br>Sample size justified |
|                     | 80mg | Duloxetine<br>20mg |                                                                                                        | (69/113)<br>[75/110]   | 0.90<br>(0.74; 1.09)               | -0.07<br>(-0.20; 0.05)  |                                                                                                   |
|                     | 40mg | Duloxetine<br>20mg | Failure to cure<br>(objective - CST)                                                                   | (63/111)<br>[75/110]   | 0.83<br>(0.68; 1.02)               | -0.11<br>(-0.24; 0.01)  |                                                                                                   |
|                     | 80mg | Duloxetine<br>40mg |                                                                                                        | (96/114)<br>[86/112]   | 1.10<br>(0.96; 1.25)               | 0.07<br>(-0.03; 0.18)   |                                                                                                   |
|                     | 80mg | Duloxetine<br>20mg | Failure to cure<br>(objective - diary)                                                                 | (96/114)<br>[101/112]  | 0.93<br>(0.84; 1.03)               | -0.06<br>(-0.15; 0.03)  |                                                                                                   |
|                     | 40mg | Duloxetine<br>20mg |                                                                                                        | (86/112)<br>[101/112]  | <b>0.85</b><br><b>(0.76; 0.96)</b> | -0.13<br>(-0.23; -0.04) |                                                                                                   |
|                     | 80mg | Duloxetine<br>40mg | General Health<br>Status ('very much<br>better,' 'much<br>better,' or 'a little<br>better' from PGI-I) | (100/123)<br>[93/123]  | 1.08<br>(0.94; 1.23)               | 0.06<br>(-0.05; 0.16)   |                                                                                                   |
|                     | 80mg | Duloxetine<br>20mg |                                                                                                        | (100/123)<br>[107/128] | 0.97<br>(0.87; 1.09)               | -0.02<br>(-0.12; 0.07)  |                                                                                                   |
|                     | 40mg | Duloxetine<br>20mg | General Health<br>Status ('very much<br>better,' 'much<br>better,' or 'a little<br>better' from PGI-I) | (93/123)<br>[107/128]  | 0.90<br>(0.80; 1.03)               | -0.08<br>(-0.18; 0.02)  |                                                                                                   |
|                     | 80mg | Duloxetine<br>40mg |                                                                                                        | (62/140)<br>[51/137]   | 1.19<br>(0.89; 1.58)               | 0.07<br>(-0.04; 0.19)   |                                                                                                   |
|                     | 80mg | Duloxetine<br>20mg | General Health<br>Status ('very much<br>better,' 'much<br>better,' or 'a little<br>better' from PGI-I) | (62/140)<br>[43/138]   | <b>1.42</b><br><b>(1.04; 1.94)</b> | 0.13<br>(0.02; 0.24)    |                                                                                                   |
|                     | 40mg | Duloxetine<br>20mg |                                                                                                        | (51/137)<br>[43/138]   | 1.19<br>(0.86; 1.66)               | 0.06<br>(-0.05; 0.17)   |                                                                                                   |

\*Bold - significant relative risk at 95% confidence level. CST = cough stress test; NT = no treatment; PCT = positive cough stress test; PGI-I = Patient Global Impression of Improvement; PFMT = pelvic floor muscle training; SPT = stress pad test.

†not in the review (70).
