# Supplementary material
Source: HighWire-hosted journal article supplement (https://www.annals.org/content/suppl/2008/02/12/0000605-200803180-00211)
Supplement: Kane_AT09_148-6-458-DC1-9.pdf [file Kane_AT09_148-6-458-DC1-9.pdf]

Appendix Table 9. Effects of Anticholinergic Drugs Compared with Placebo on Self-Reported Urinary Continence or Improvement in UI in Women with Overactive Bladder (90)\*

| Author<br>Year         | Active<br>Treatment                        | Control<br>Treatment  | (Events/Active<br>Treatment)<br>[Events / Control<br>Treatment] | Relative Risk<br>(95% CI) | Risk Difference<br>(95%CI) | Quality                                                                                                                                                                         |
|------------------------|--------------------------------------------|-----------------------|-----------------------------------------------------------------|---------------------------|----------------------------|---------------------------------------------------------------------------------------------------------------------------------------------------------------------------------|
| Burgio†, 1998<br>(174) | Oxybutynin 5-<br>10mg                      | Placebo               | (45/55)<br>[34/52]                                              | 1.25 (0.99; 1.58)         | 0.16 (0.00; 0.33)          | Intention to treat.<br>Modified crossover design<br>(extension of a randomized<br>double blind clinical trial).<br>Allocation concealment<br>adequate. Sample size<br>justified |
| DuBeau,<br>2005(91)    | Tolterodine ER 4<br>mg                     | Placebo               | (383/569)<br>[134/285]                                          | <b>1.43 (1.25; 1.64)</b>  | 0.20 (0.13; 0.27)          | Not Intention to treat.<br>Double blind. Allocation<br>concealment adequate.<br>Sample size justified                                                                           |
| Diokno,<br>2003(92)    | Oxybutynin ER<br>10 mg                     | Tolterodine ER<br>4mg | (90/391)<br>[67/399]                                            | <b>1.37 (1.03; 1.82)</b>  | 0.06 (0.01; 0.12)          | Intention to treat.<br>Double blind. Allocation<br>concealment unclear.<br>Sample size not justified                                                                            |
| Khullar,<br>2004†(93)  | Tolterodine ER 4<br>mg                     | Placebo               | (347/569)<br>[131/285]                                          | <b>1.33 (1.15; 1.53)</b>  | 0.15 (0.08; 0.22)          | Intention to treat.<br>Double-blind.<br>Randomization by<br>permuted blocks.<br>Allocation concealment<br>adequate. Sample size<br>justified                                    |
| Anderson,<br>1999(94)  | Oxybutynin<br>controlled release<br>5-20mg | Oxybutynin IR<br>5mg  | (4/53)<br>[8/52]                                                | 0.49 (0.16; 1.53)         | -0.08 (-0.20; 0.04)        | Not Intention to treat<br>Double-blind. Allocation<br>concealment unclear.<br>Sample size not justified                                                                         |

\*Bold - significant relative risk at 95% confidence level. ER = extended release; IR = immediate release.

† included in the review (90).
