# Supplementary material
Source: HighWire-hosted journal article supplement (https://www.annals.org/content/suppl/2008/02/12/0000605-200803180-00211)
Supplement: Kane_AT10_148-6-458-DC1-10.pdf [file Kane_AT10_148-6-458-DC1-10.pdf]

Appendix Table 10. Effects of Adrenergic Drugs on Self-Reported Urinary Continence in Women: Results from Randomized Controlled Clinical Trials (43)\*

| Author Year        | Active Treatment    | Control Treatment            | (Events/Active Treatment)<br>[Events/Control Treatment] | Relative Risk (95% CI)    | Risk Difference (95%CI) | Quality                                                                                                                           |
|--------------------|---------------------|------------------------------|---------------------------------------------------------|---------------------------|-------------------------|-----------------------------------------------------------------------------------------------------------------------------------|
| Yasuda, 1993(136)  | Clenbuterol         | Placebo                      | (8/77)<br>[2/88]                                        | <b>4.57 (1.00; 20.88)</b> | 0.08 (0.01; 0.16)       | No Intention to treat. Double blind. Allocation concealment adequate. Sample size not justified.                                  |
| Lose, 1988(175)    | Norepinephrine      | Placebo                      | (6/23)<br>[3/21]                                        | 1.83 (0.52; 6.39)         | 0.12 (-0.12; 0.35)      | Intention to treat. Double blind. Allocation concealment adequate. Sample size justified                                          |
| Hilton, 1990(132)  | Phenylpropanolamine | Placebo                      | (0/9)<br>[2/11]                                         | 0.24 (0.01; 4.44)         | -0.18 (-0.45; 0.08)     | No Intention to treat. Double blind crossover RCT. Allocation concealment adequate. Sample size not justified                     |
| Lehtonen, 1986(44) | Phenylpropanolamine | Placebo                      | (15/21)<br>[8/22]                                       | <b>1.96 (1.06; 3.63)</b>  | 0.35 (0.07; 0.63)       | No Intention to treat. Double blind. Allocation concealment adequate. Sample size not justified.                                  |
| Yasuda, 1993(136)  | Clenbuterol         | Placebo                      | (36/77)<br>[21/88]                                      | <b>1.96 (1.26; 3.05)</b>  | 0.23 (0.09; 0.37)       | No Intention to treat. Double blind. Allocation concealment adequate. Sample size not justified.                                  |
| Wells, 1991(135)   | Phenylpropanolamine | Pelvic floor muscle training | (54/75)<br>[42/82]                                      | <b>1.41 (1.09; 1.81)</b>  | 0.21 (0.06; 0.36)       | No Intention to treat (ITT assuming dropouts are failures) Open label. Allocation concealment unclear. Sample size not justified. |
| Ishiko, 2000(133)  | Clenbuterol         | Pelvic floor muscle          | (10/15)<br>[10/19]                                      | 1.27 (0.73; 2.21)         | 0.14 (-0.19; 0.47)      | No Intention to treat (ITT assuming dropouts are                                                                                  |

|                      |                                   |                                                               |                                        |                                         |                                         |                                                                                                                                                  |
|----------------------|-----------------------------------|---------------------------------------------------------------|----------------------------------------|-----------------------------------------|-----------------------------------------|--------------------------------------------------------------------------------------------------------------------------------------------------|
|                      |                                   | training<br>Clenbuterol<br>Pelvic floor<br>muscle<br>training | (10/15)<br>[17/22]                     | 0.86 (0.56; 1.32)                       | -0.11 (-0.40; 0.19)                     | failures) Allocation<br>concealment not adequate.<br>Sample size not justified.                                                                  |
| Wells,<br>1991(135)  | Phenylpropanolamine               | <u>Pelvic floor<br/>muscle<br/>training</u>                   | (2/52)<br>[9/34]<br>(22/52)<br>[16/34] | <b>0.15 (0.03; 0.63)</b>                | -0.23 (-0.38; -0.07)                    | No Intention to treat (ITT<br>assuming dropouts are<br>failures) Open label.<br>Allocation concealment<br>unclear. Sample size not<br>justified. |
| Walter,<br>1990(134) | Phenylpropanolamine<br>+ estrogen | Estrogen                                                      | (2/15)<br>[2/14]                       | 0.93 (0.15; 5.76)                       | -0.01 (-0.26; 0.24)                     | No Intention to treat Double<br>blind. Allocation<br>concealment adequate.<br>Sample size not justified                                          |
| Hilton,<br>1990(132) | Phenylpropanolamine<br>+ estrogen | Estrogen                                                      | (13/29)<br>[3/19]                      | 2.84 (0.93; 8.65)                       | 0.29 (0.05; 0.53)                       | No Intention to treat. Double<br>blind crossover RCT.<br>Allocation concealment<br>adequate. Sample size not<br>justified                        |
| Walter,<br>1990(134) | Phenylpropanolamine<br>+ estrogen | Estrogen                                                      | (4/15)<br>[6/14]                       | 0.62 (0.22; 1.75)                       | -0.16 (-0.50; 0.18)                     | No Intention to treat Double<br>blind. Allocation<br>concealment adequate.<br>Sample size not justified                                          |
| Hilton,<br>1990(132) | Phenylpropanolamine<br>+ estrogen | Placebo                                                       | (13/29)<br>[2/11]<br>(12/20)<br>[2/11] | 2.47 (0.66; 9.20)<br>3.30 (0.90; 12.15) | 0.27 (-0.02; 0.56)<br>0.42 (0.11; 0.73) | No Intention to treat. Double<br>blind crossover RCT.<br>Allocation concealment<br>adequate. Sample size not<br>justified                        |
|                      | Phenylpropanolamine               | Estrogen                                                      | (12/20)<br>[0/9]                       | 11.90 (0.78; 181.54)                    | 0.60 (0.35; 0.85)                       |                                                                                                                                                  |

\*Bold - significant relative risk at 95% confidence level. ITT = intention to treat; PFMT = pelvic floor muscle training; RCT = randomized, controlled trial.
